# Supplementary material for: A close look at using national ground stations for the statistical modeling of NO 2
Source: Copernicus journal article supplement (doi:10.5194/gmd-18-6717-2025), 2025-10-02
Supplement: Supplementary file 1 [file gmd-18-6717-2025-supplement.zip]

*In the main text, "suburban" refers to low population areas, while "rural" refers to far from road areas.*

Figure S1 voronoi map - the spatial distribution of NO<sub>2</sub> measurement stations (global)

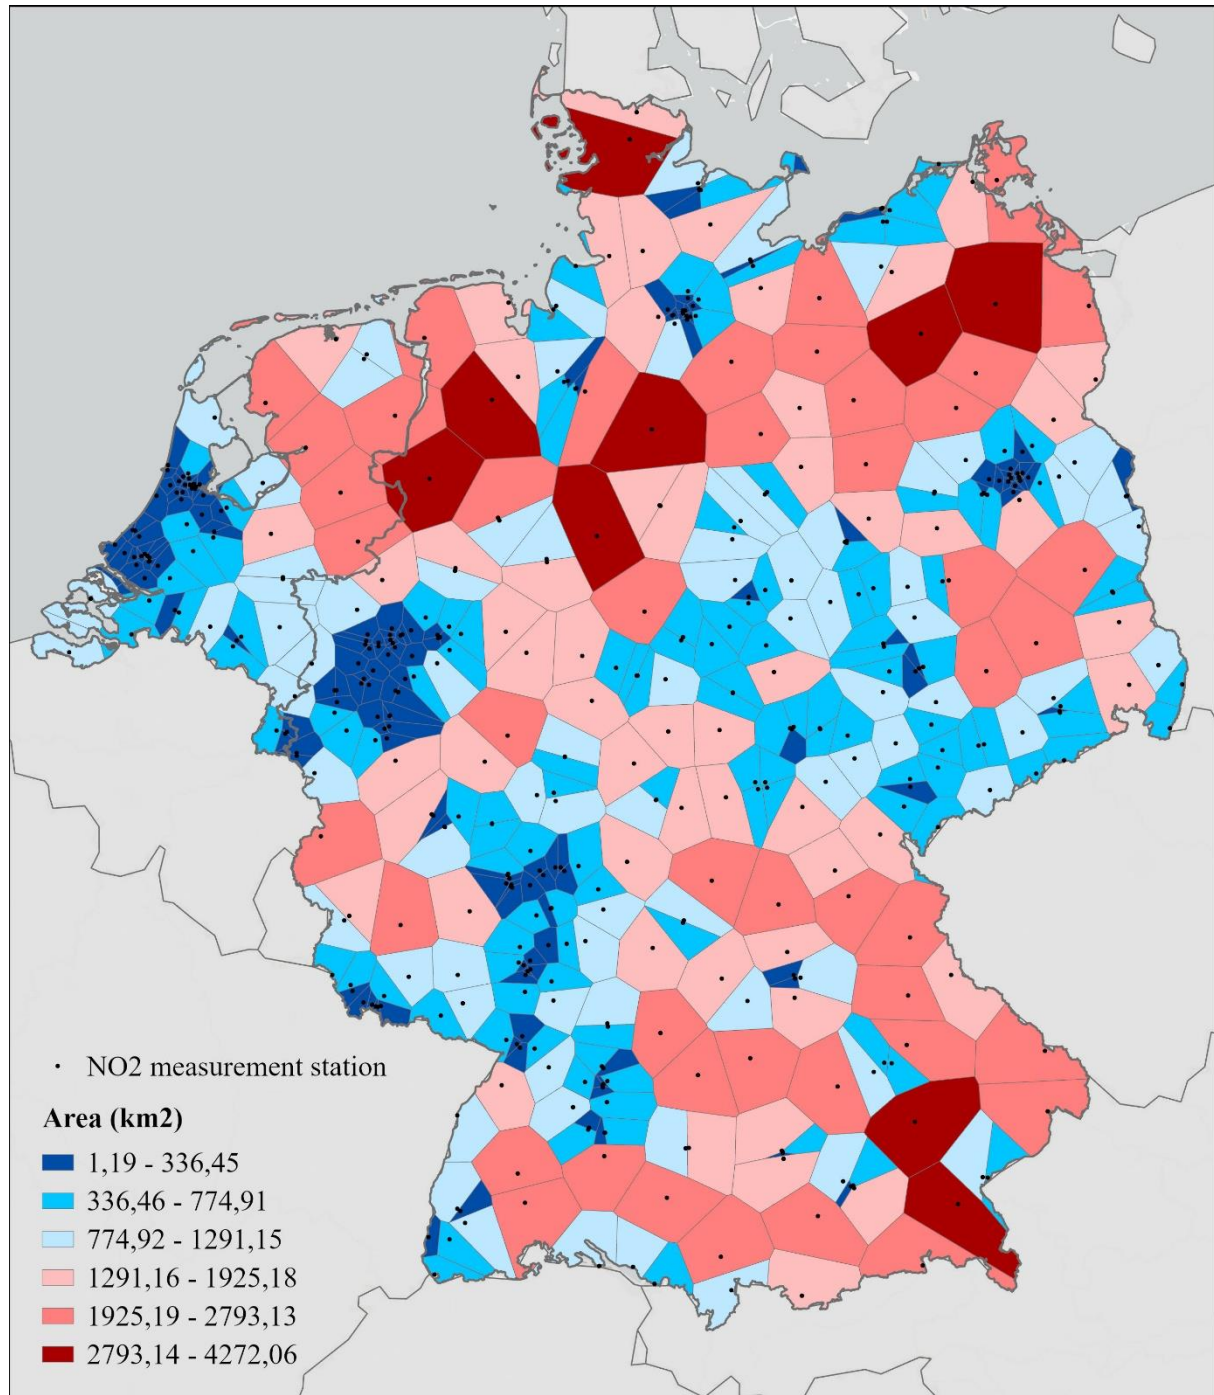

Figure S2 voronoi map - the spatial distribution of NO2 measurement stations (local)

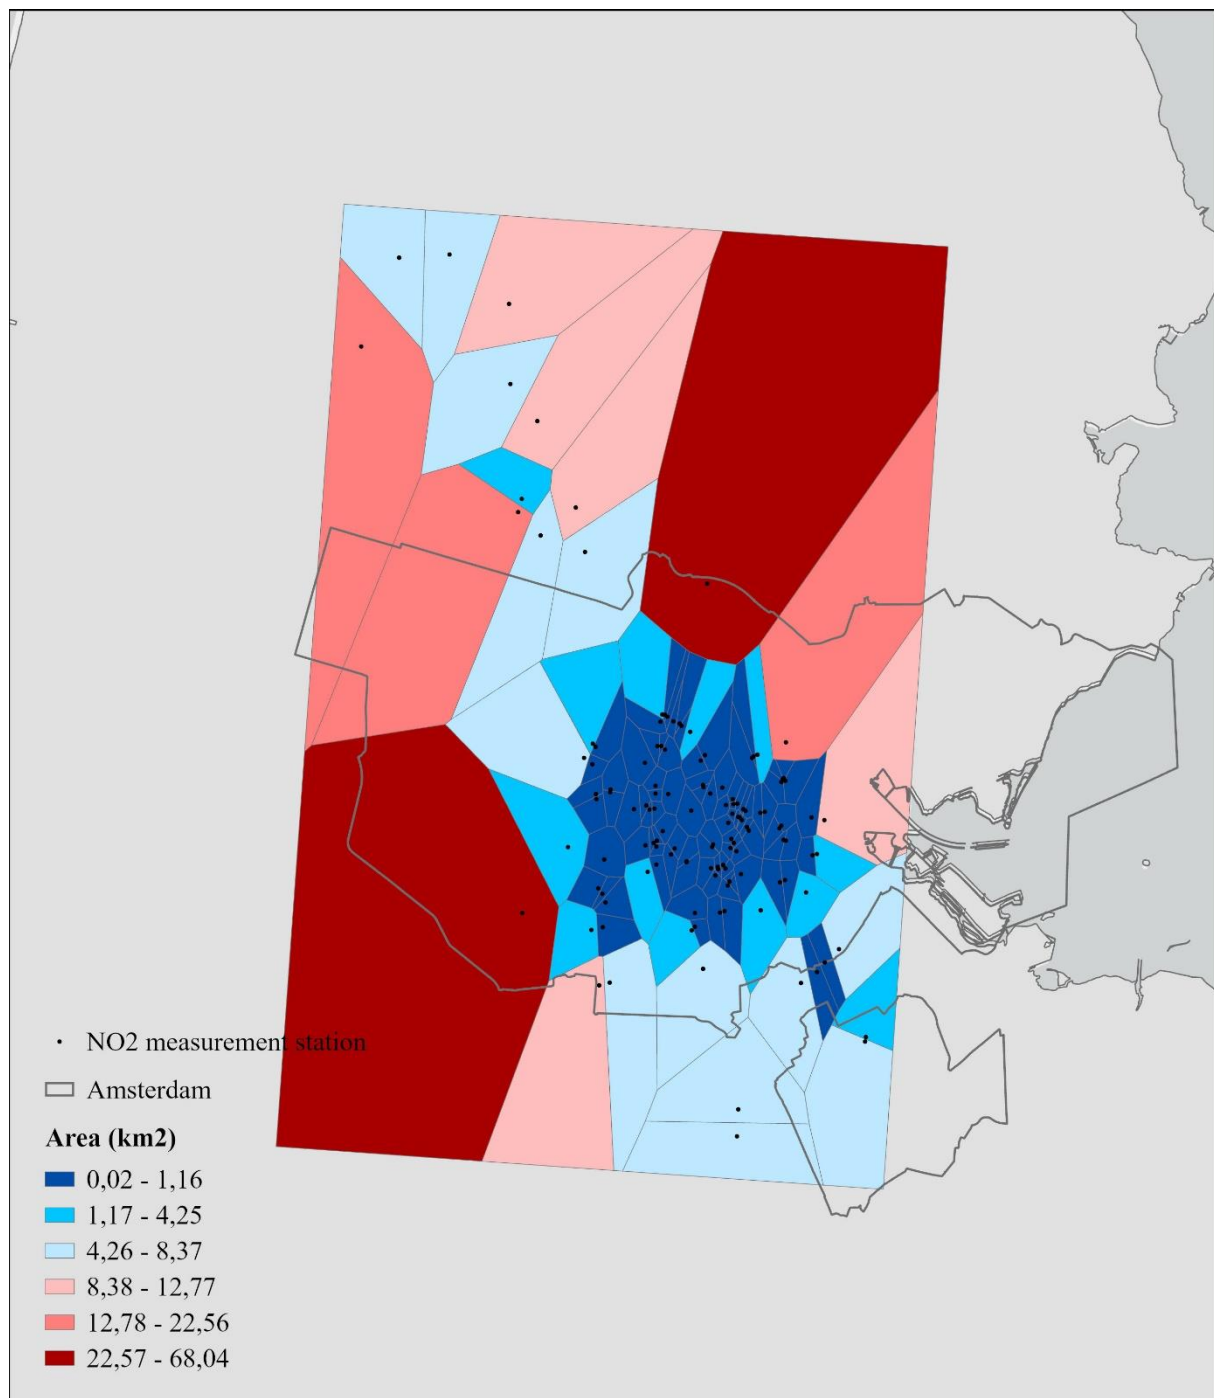

Figure S3 Spatial distribution per spatial group (global)

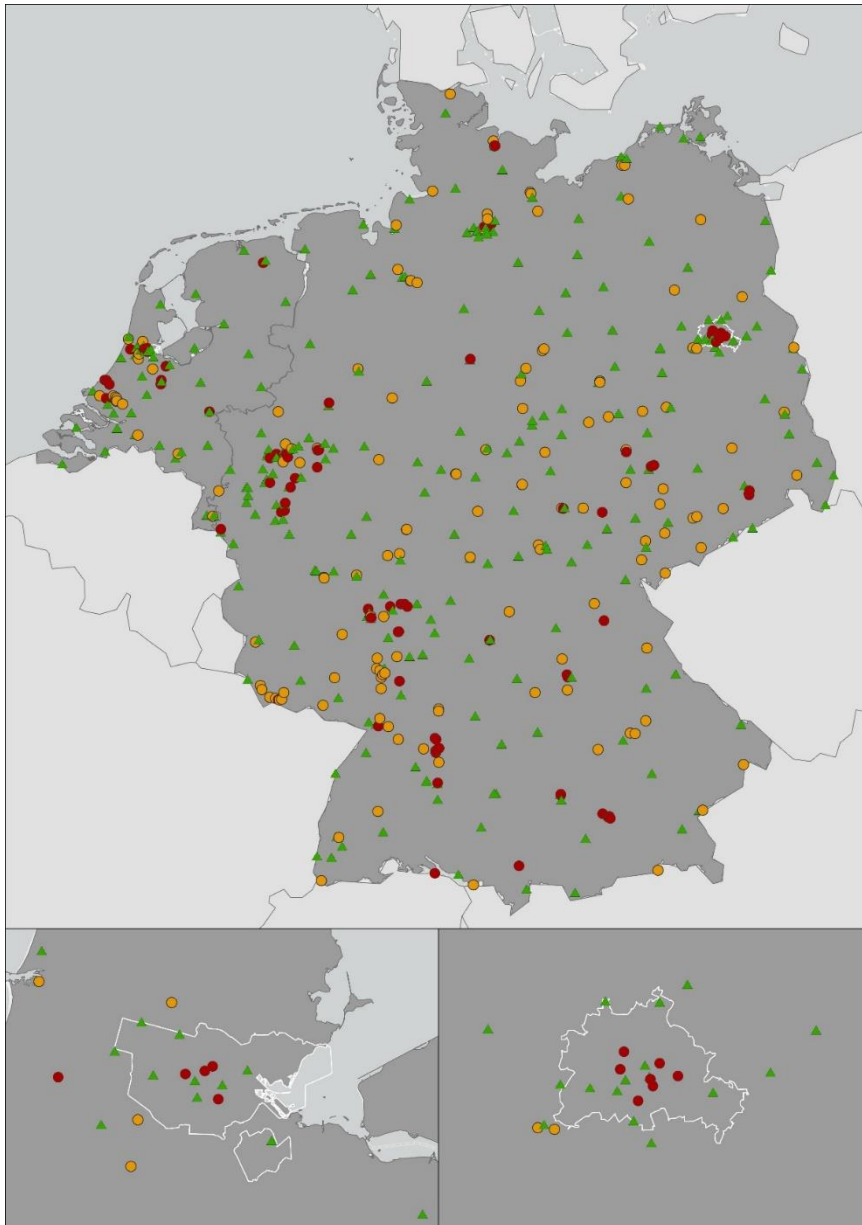

Spatial group

- Urban (close to road (<100m) ; in 25% highest populated areas)
- Suburban . (close to road (<100m); in 75% lowest populated areas)
- ▲ Rural (>100m)

Figure S4 Spatial distribution per spatial group (local)

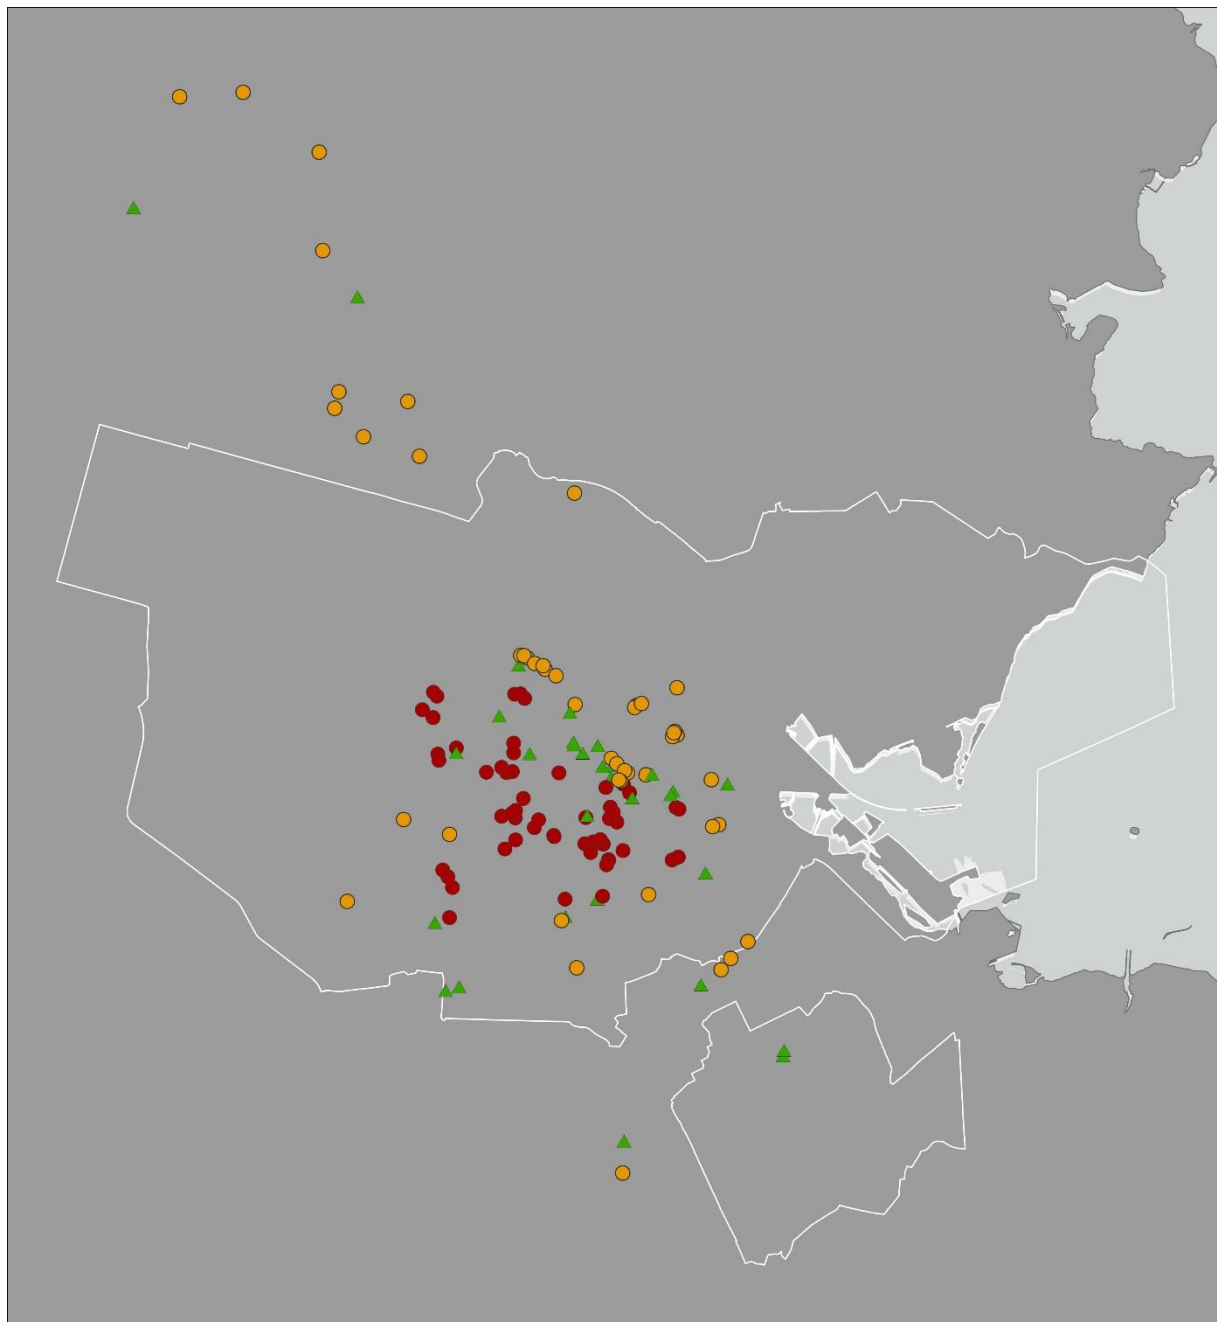

Spatial group

- Urban (close to road (<100m) ; in 25% highest populated areas)
- Suburban (close to road (<100m); in 75% lowest populated areas)
- ▲ Rural (>100m)

Figure S5 Spatial distribution of NO2 concentration values (global)



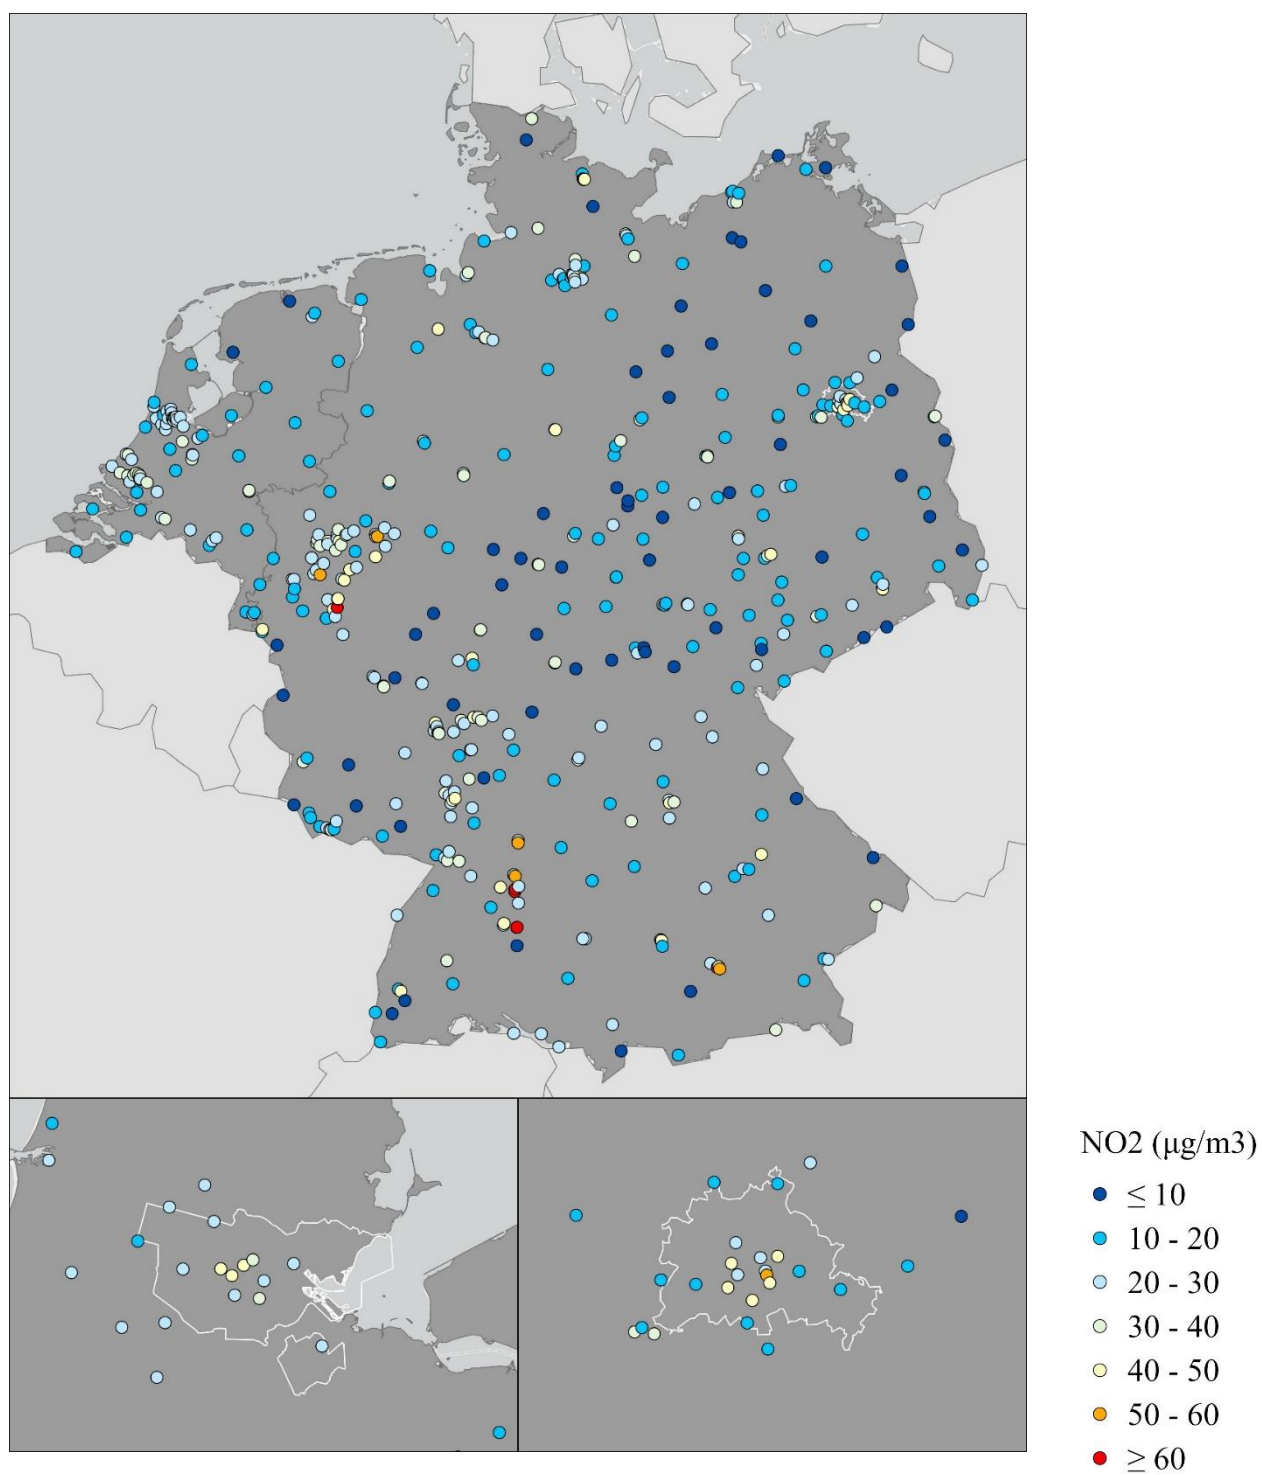

Figure S6 Spatial distribution of NO<sub>2</sub> concentration values (local)

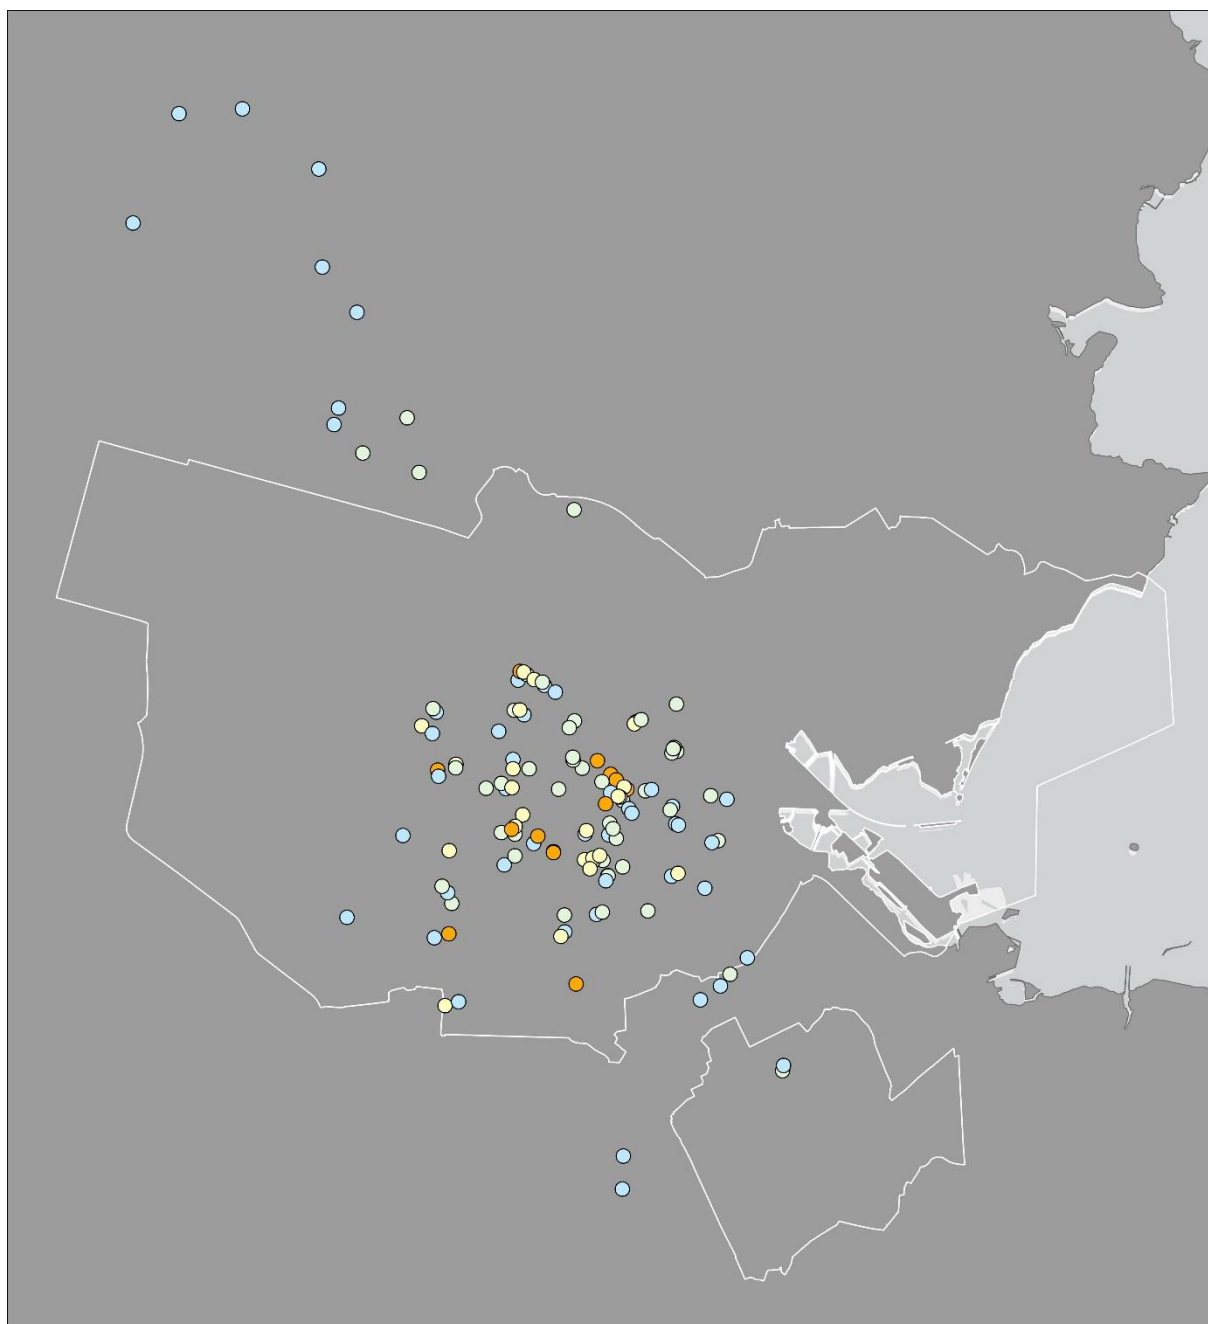

NO<sub>2</sub> (µg/m<sup>3</sup>)

- ≤ 10
- 10 - 20
- 20 - 30
- 30 - 40
- 40 - 50
- 50 - 60
- ≥ 60

Figure S7 performance ( $r^2$ ) of the xgboost model as a function of number of estimators

Figure S8 performance (RMSE) of the xgboost model as a function of number of estimators

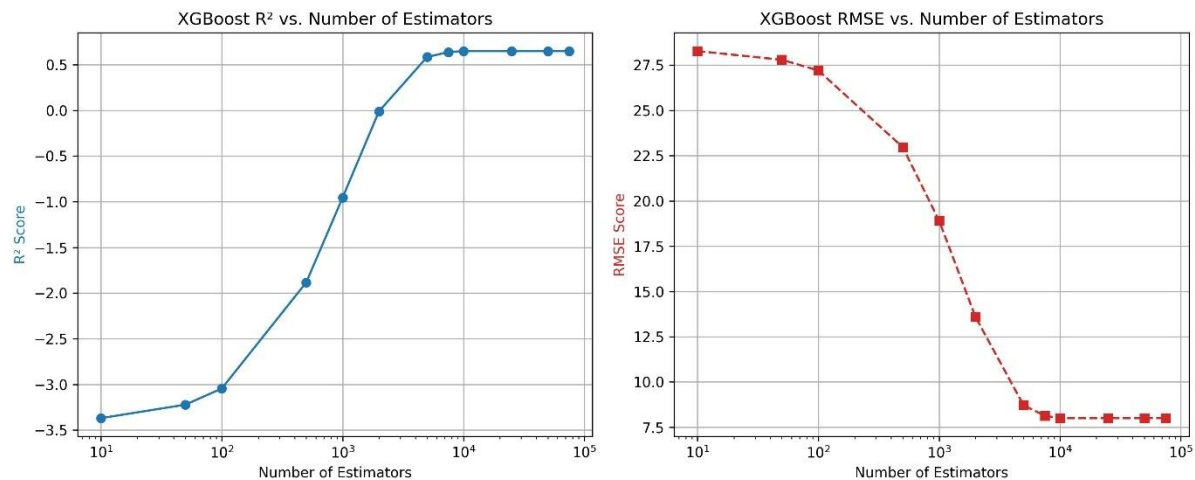

Figure S9 Out-of-sample performances evaluated using 20-fold repeated random sampling validation including LightGBM results – (global) - metric variability in  $R^2$

Rf = random forest, lgb = LightGBM, xgb = XGBoost

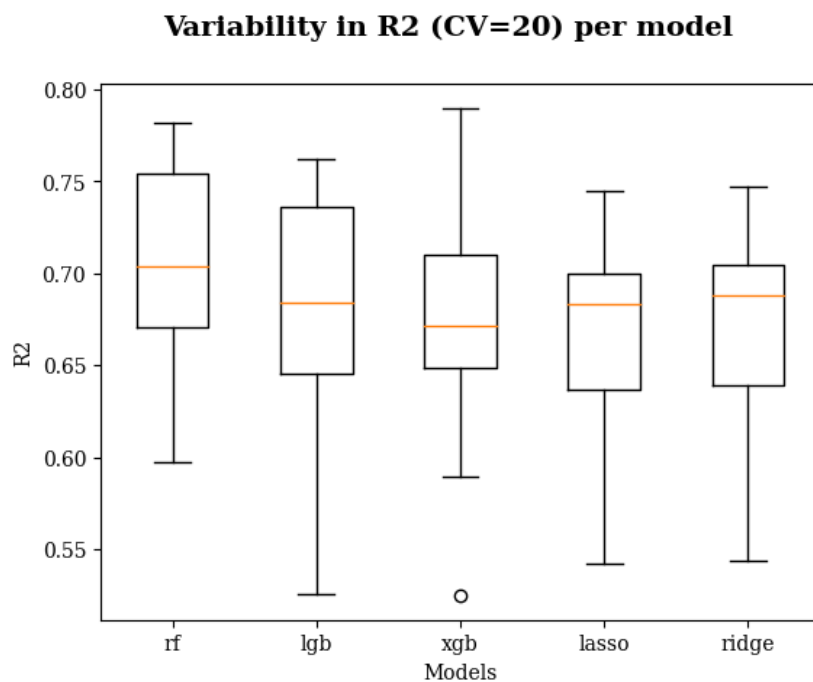

Figure S10 Out-of-sample performances evaluated using 20-fold repeated random sampling validation including LightGBM results – (global) - Figure S11 metric variability in RMSE

### Variability in Root Mean Square Error (CV=20) per model

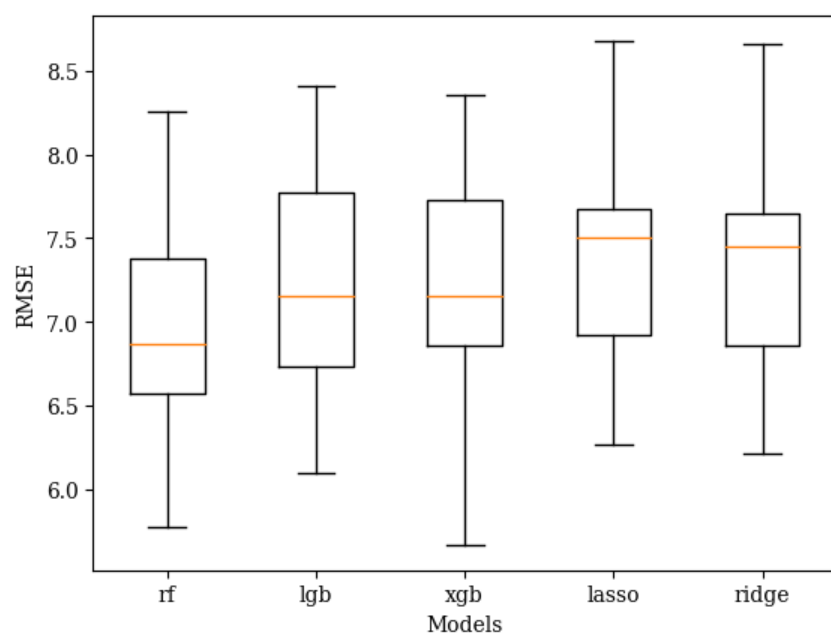

Figure S11 Out-of-sample performances evaluated using 20-fold repeated random sampling validation including LightGBM results – (global) - Figure S12 metric variability in MAE

### Variability in MAE (CV=20) per model

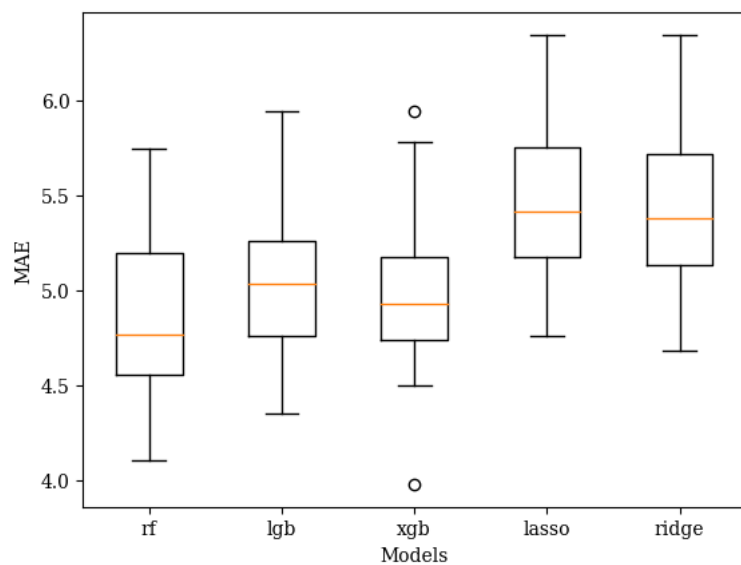

Figure S12 Spatial patterns of predicted NO<sub>2</sub> (100m), measured in  $\mu\text{g}/\text{m}^3$ , LightGBM for Amsterdam area

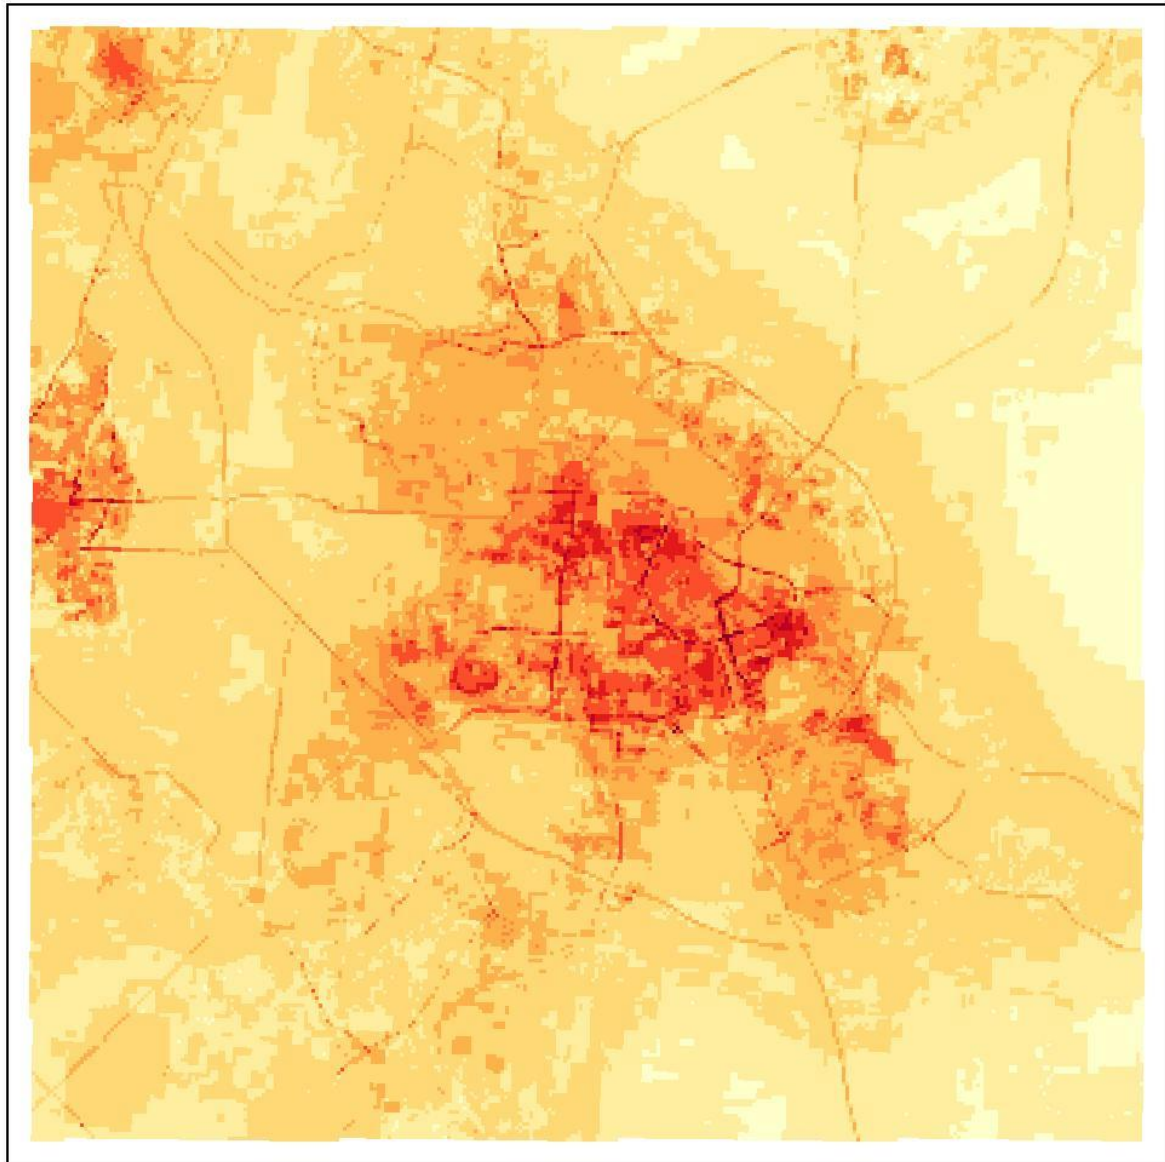



Figure S13 mean Shapley ranking against median Shapley ranking (global)

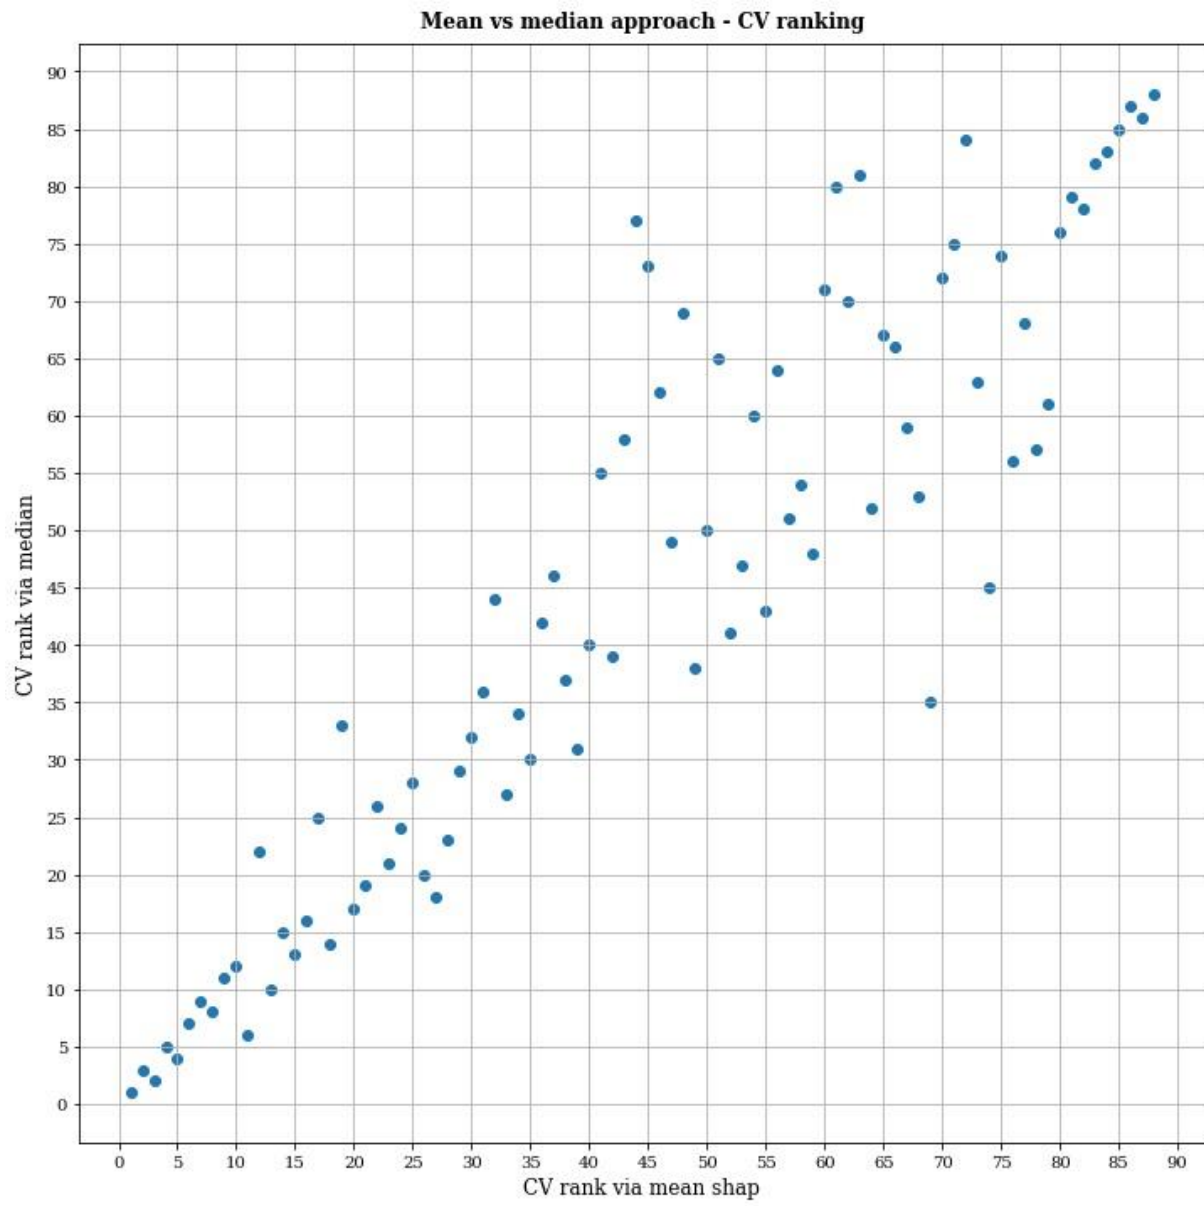

Figure S14 – Shapley seismic (global)

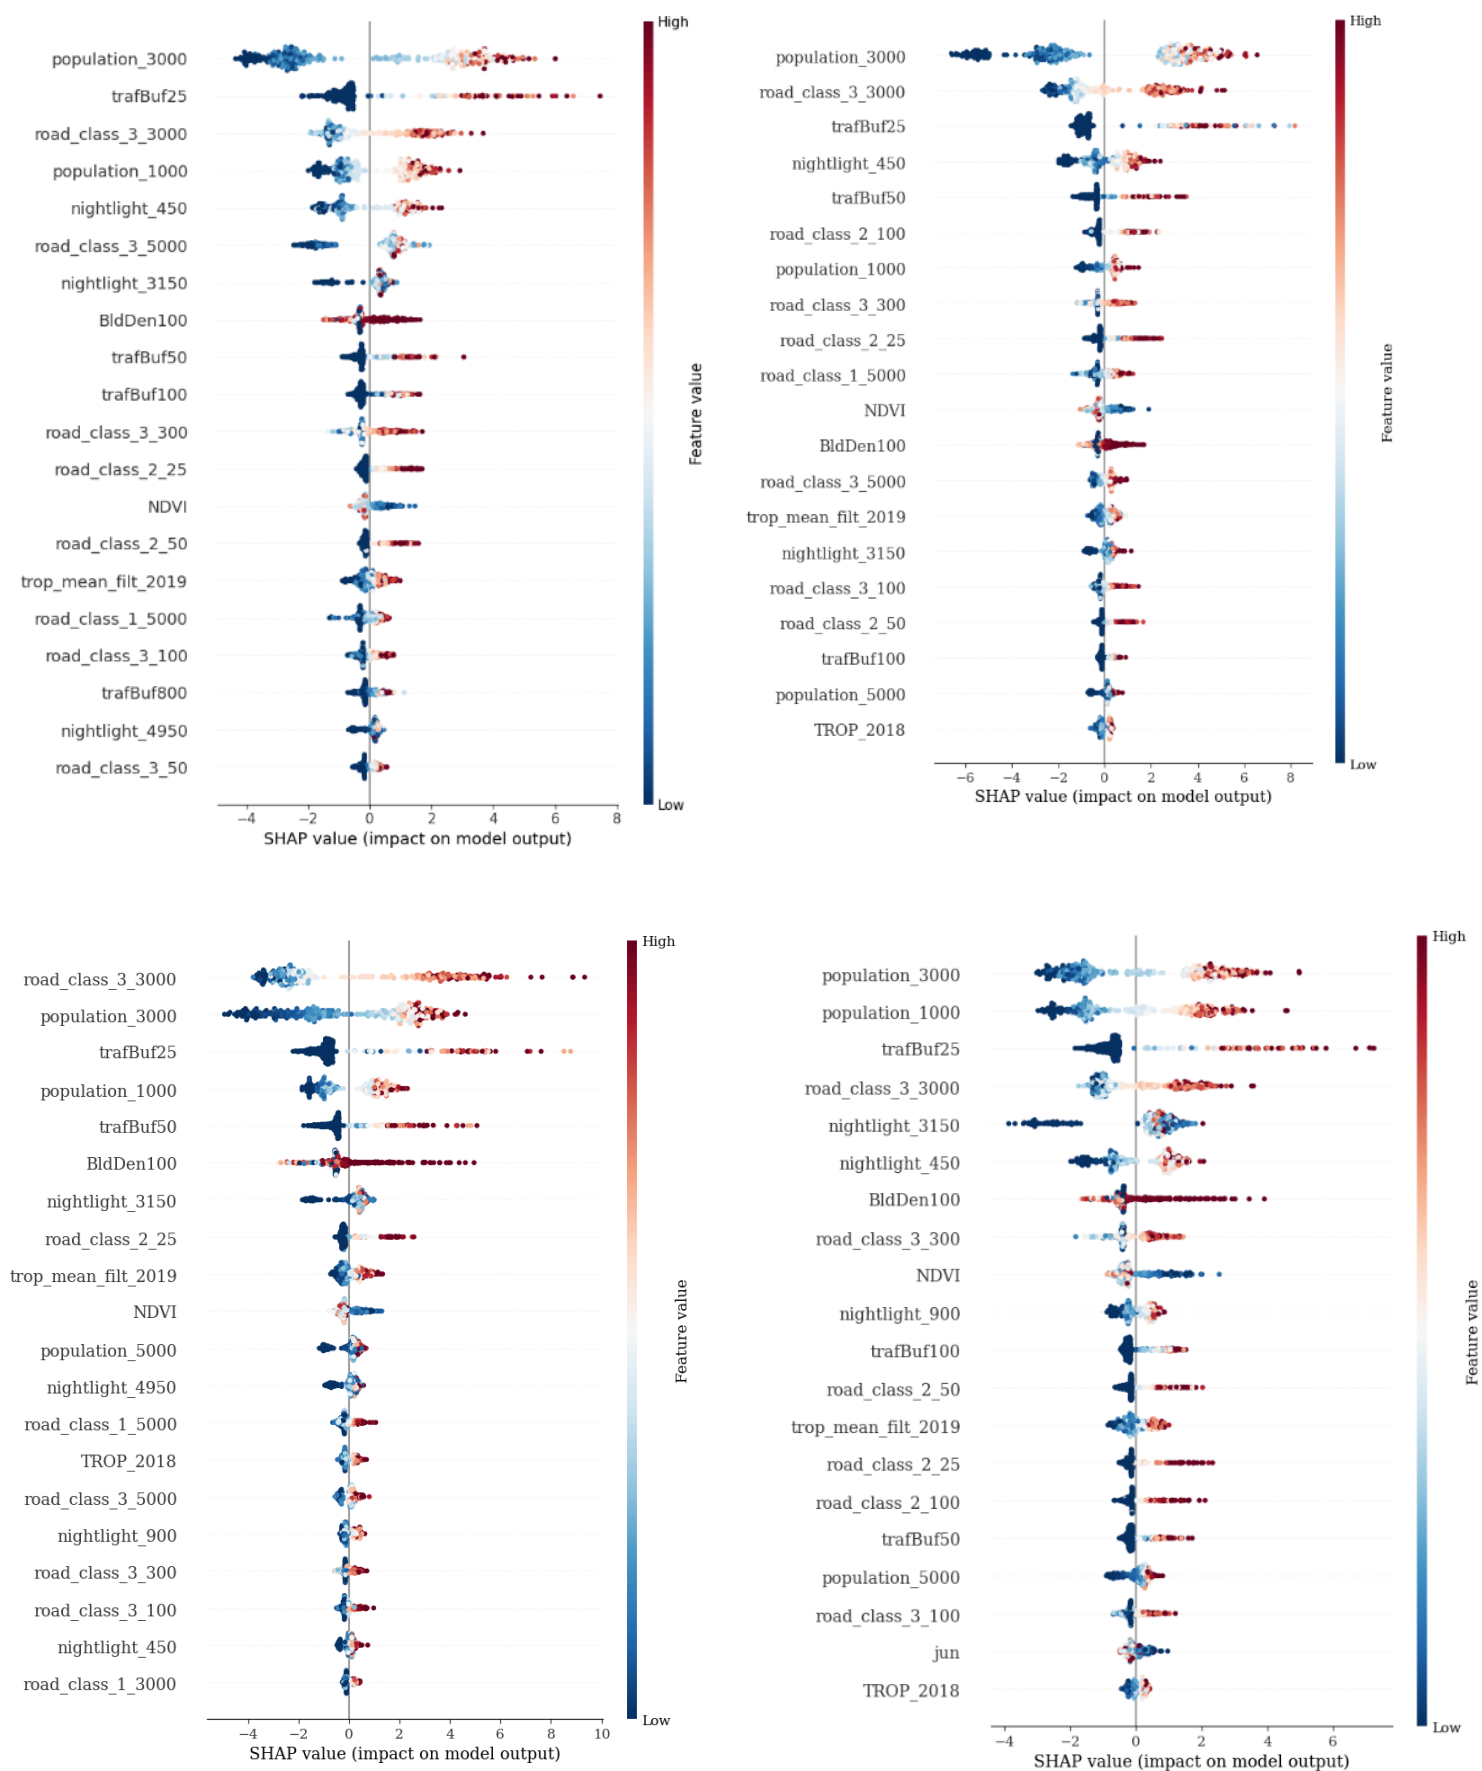

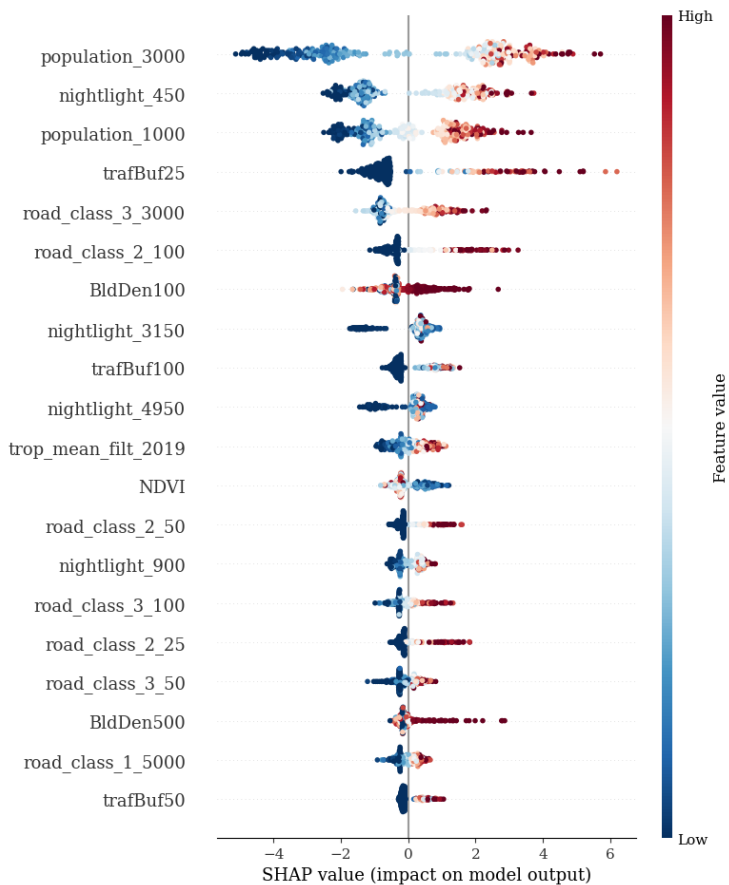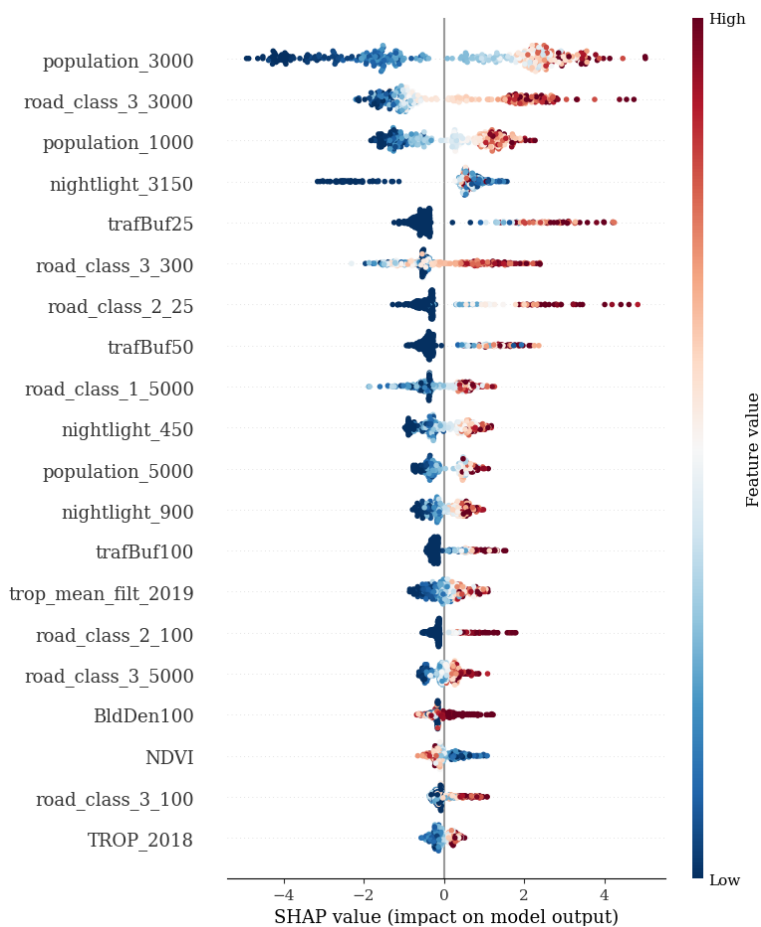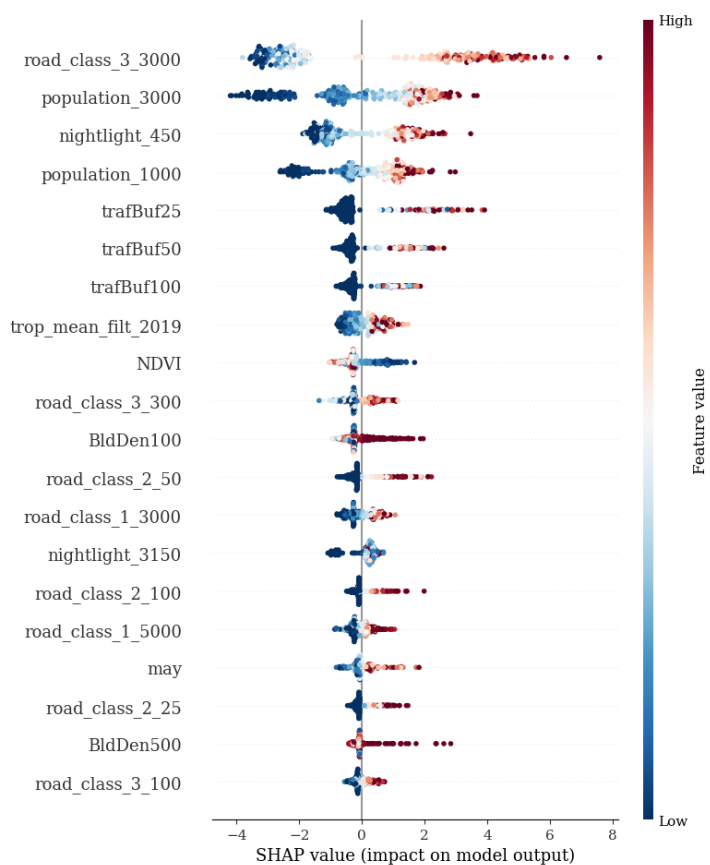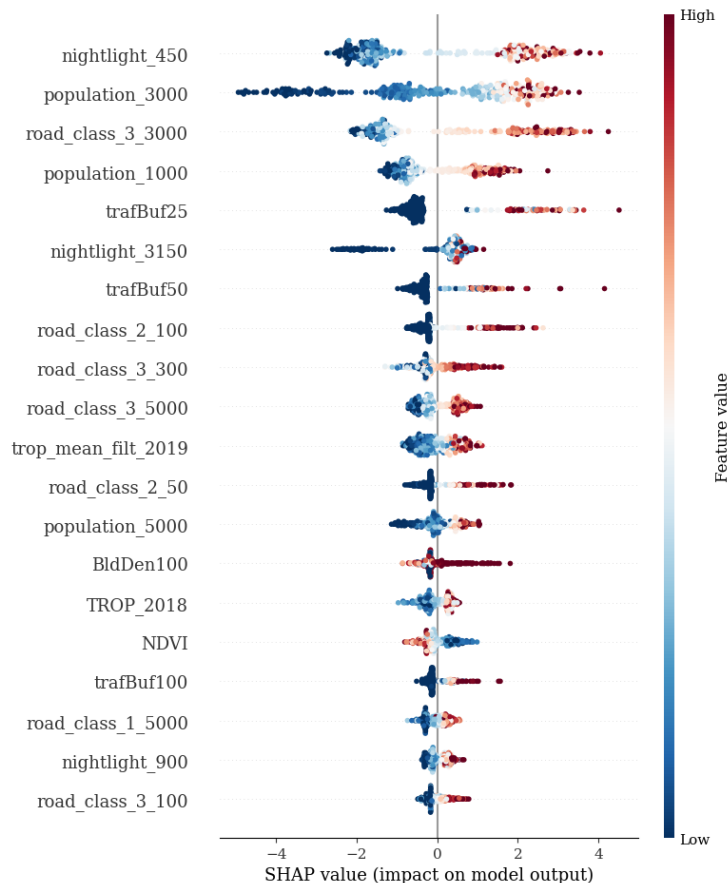

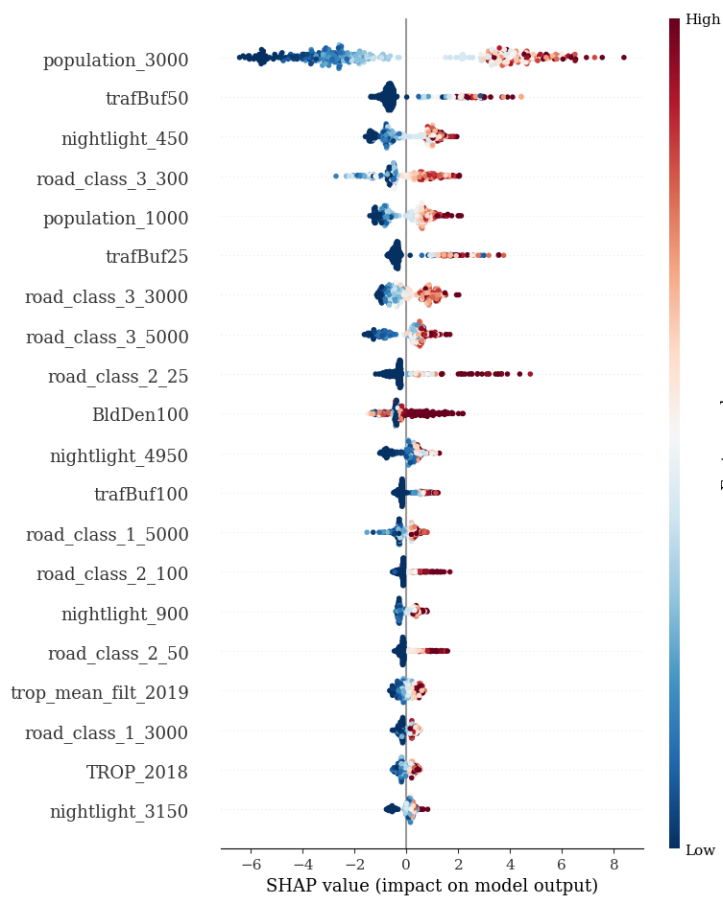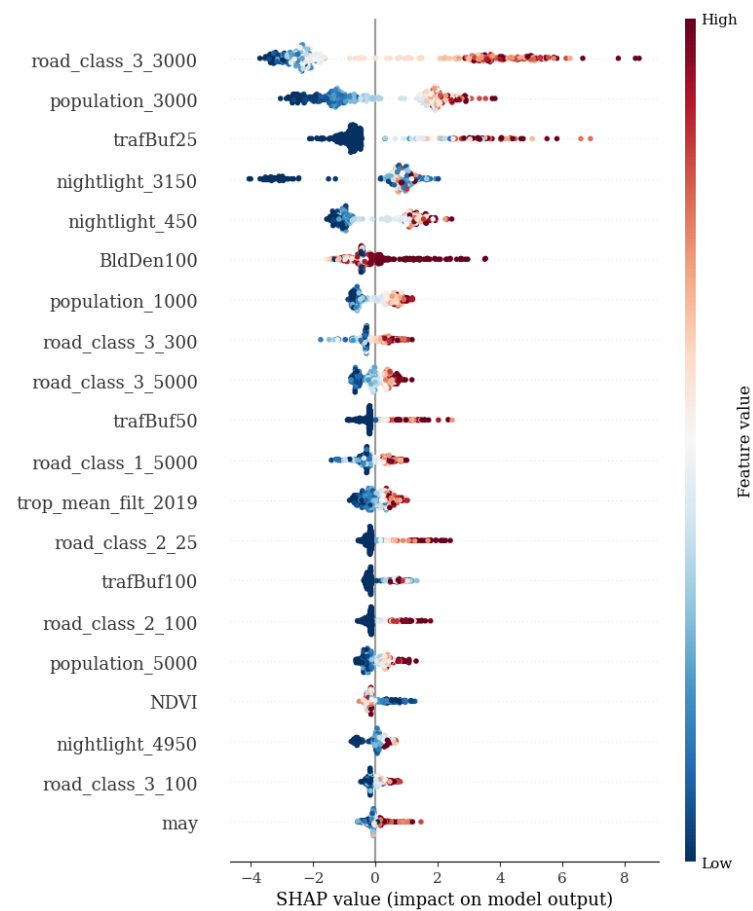

Figure S15 – R2 – Out-of-sample performances evaluated using 20-fold repeated random sampling validation – (local)

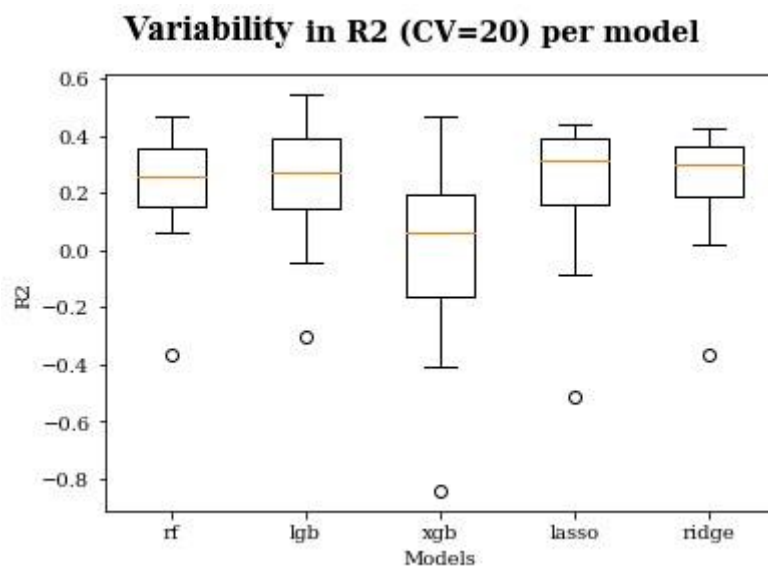

Figure S16 – RMSE – Out-of-sample performances evaluated using 20-fold repeated random sampling validation – (local)

**Variability in Root Mean Square Error (CV=20) per model**

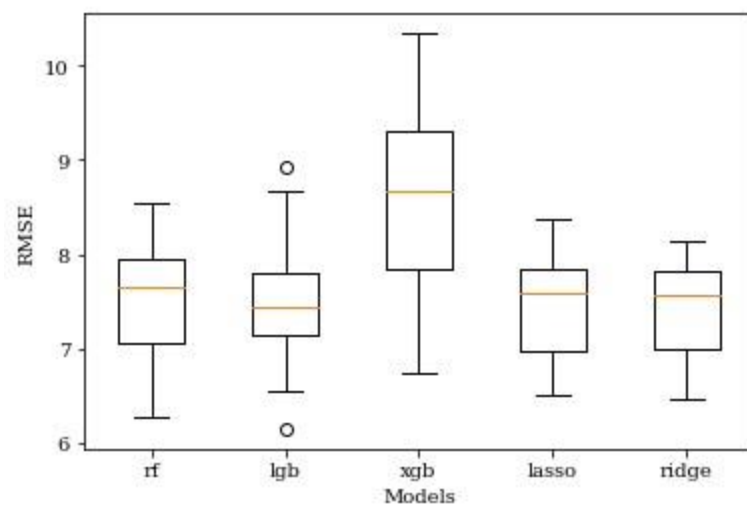

Figure S17 – MAE – Out-of-sample performances evaluated using 20-fold repeated random sampling validation – (local)

**Variability in MAE (CV=20) per model**

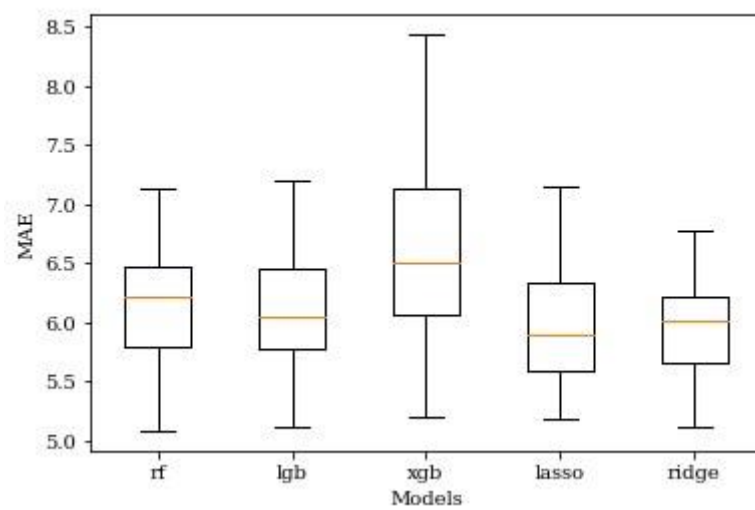



Figure S18 Spatial references Amsterdam area

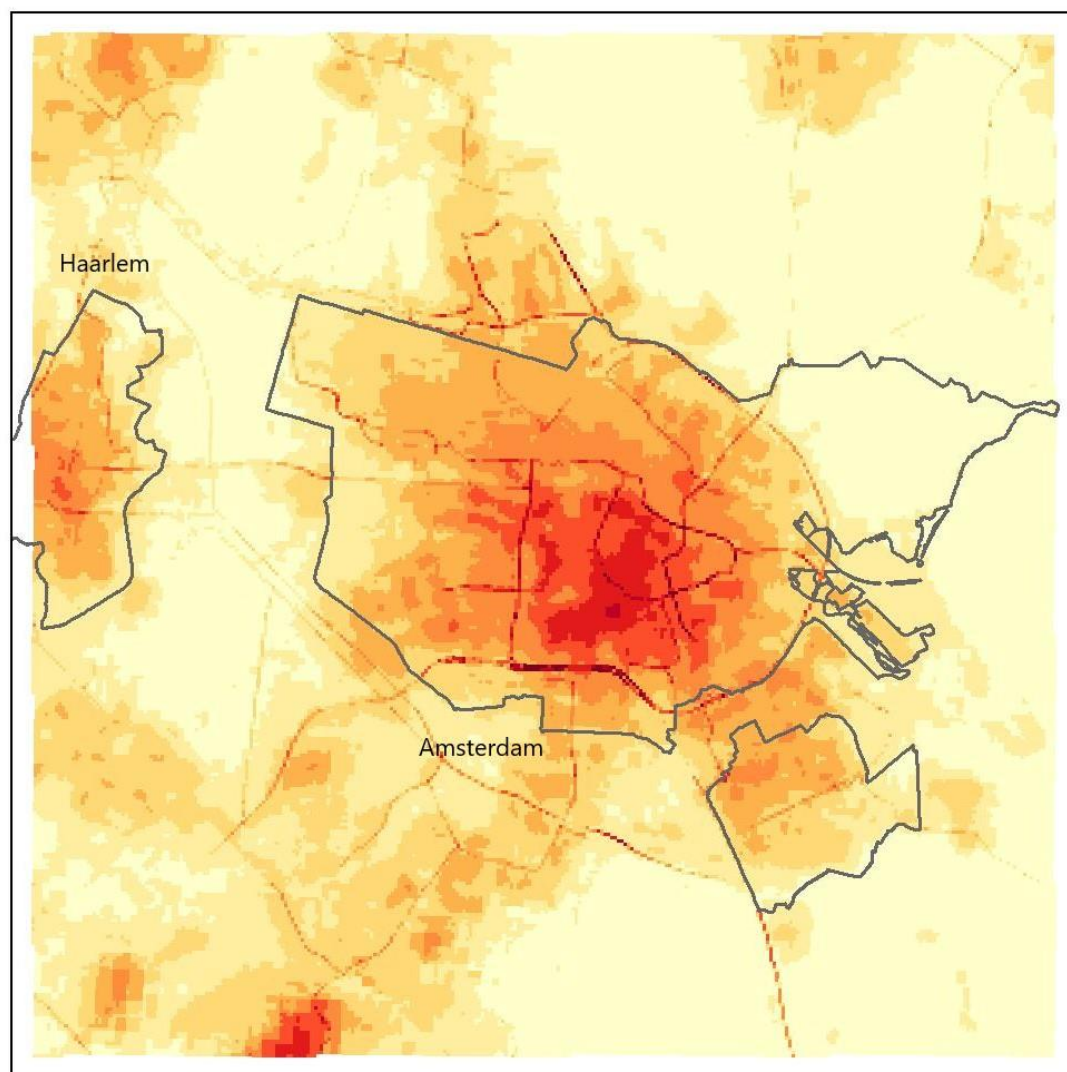

Figure S19 Hamburg predicted NO2 LASSO (colorblindfriendly)

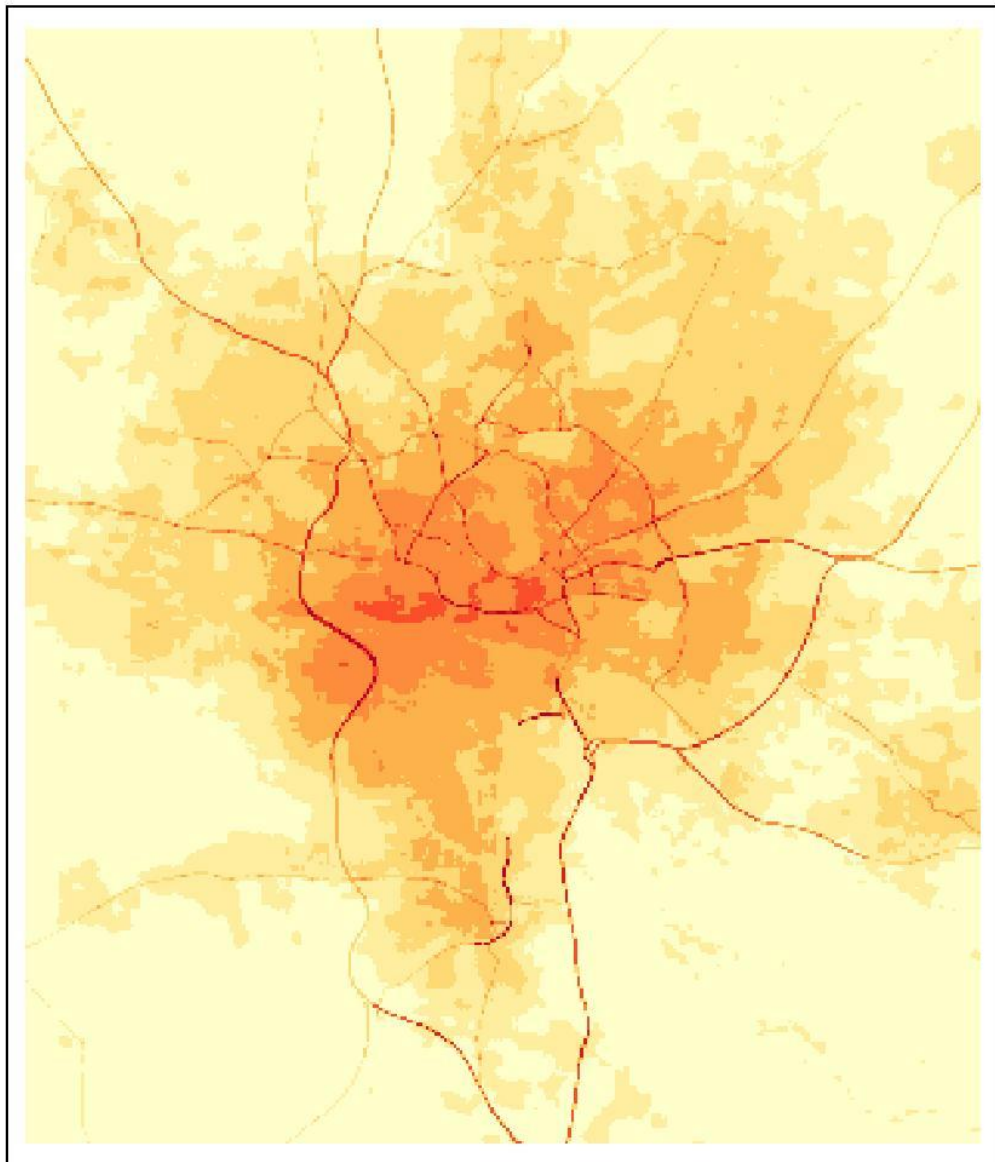

Figure S20 Hamburg predicted NO2 LightGBM (colorblindfriendly)

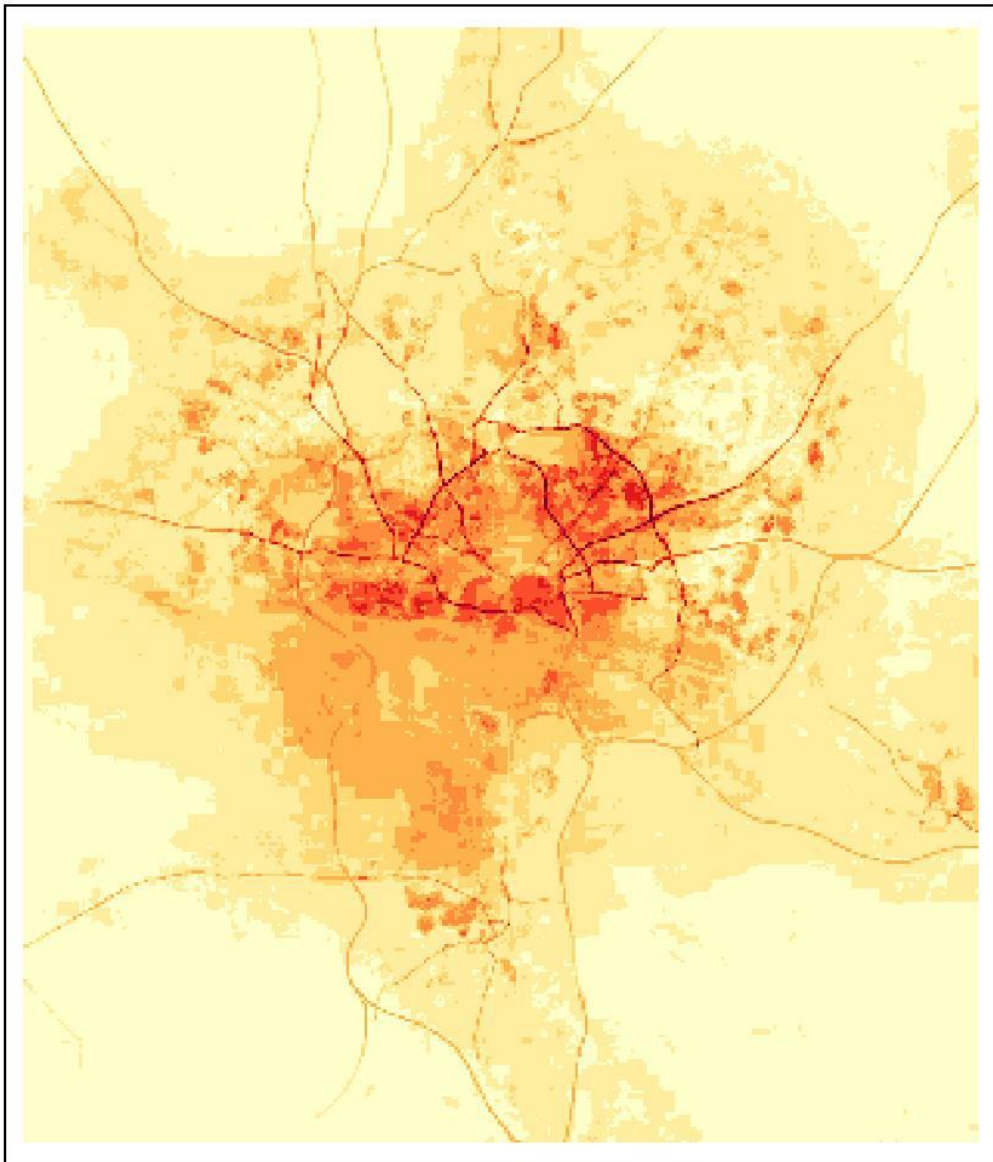

Figure S21 Hamburg predicted NO2 XGBoost (colorblindfriendly)

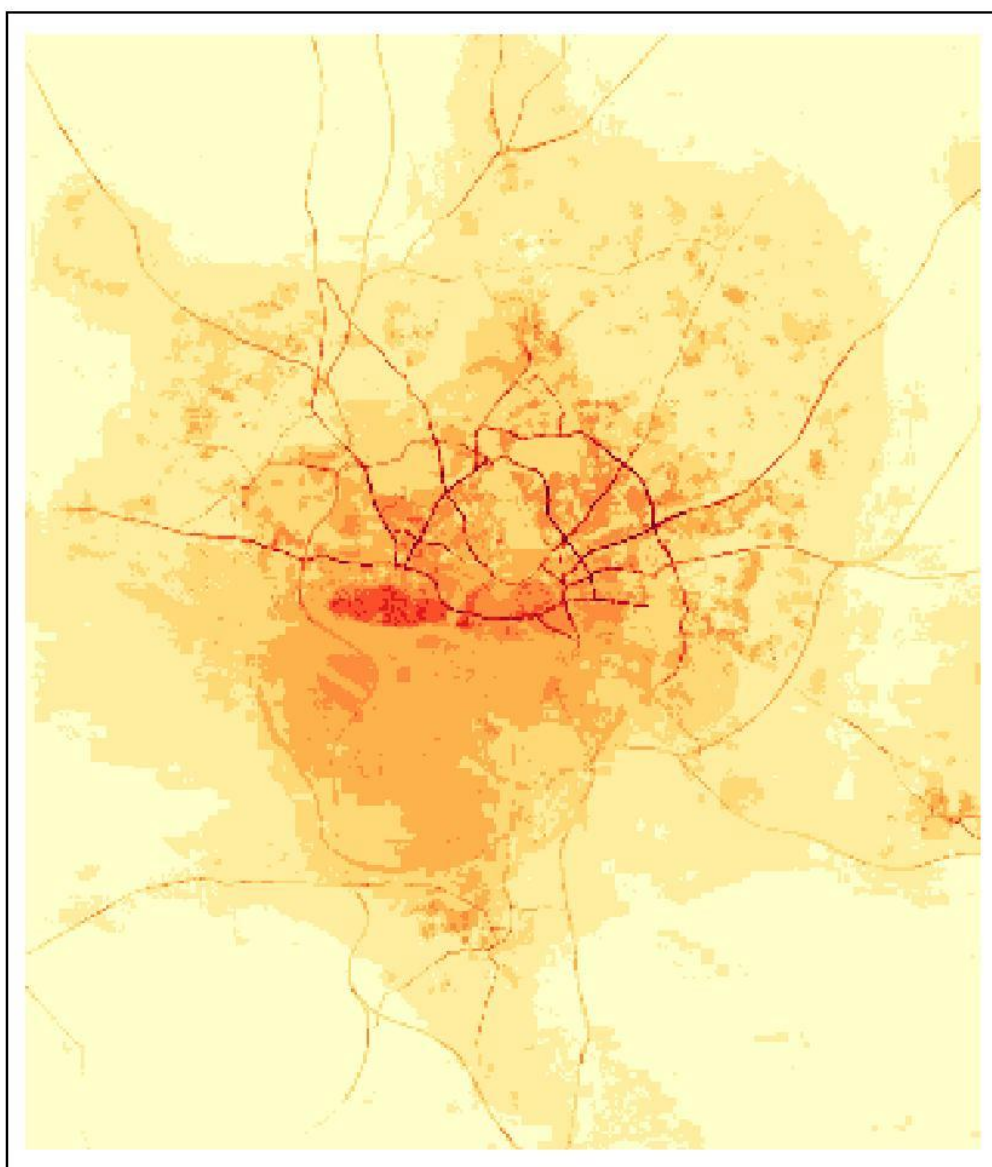

Figure S22 Utrecht predicted NO2 LASSO (colorblindfriendly)

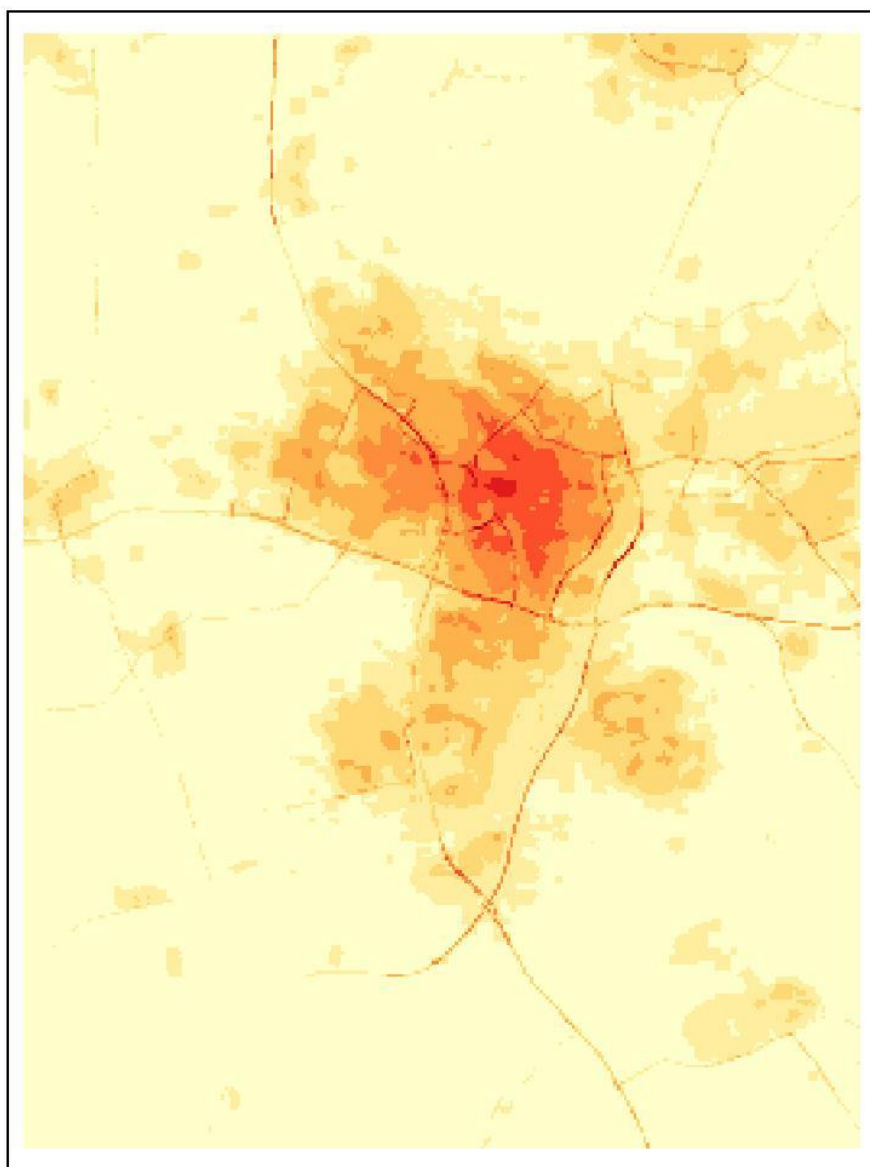

Figure S23 Utrecht predicted NO2 LightGBM (colorblindfriendly)



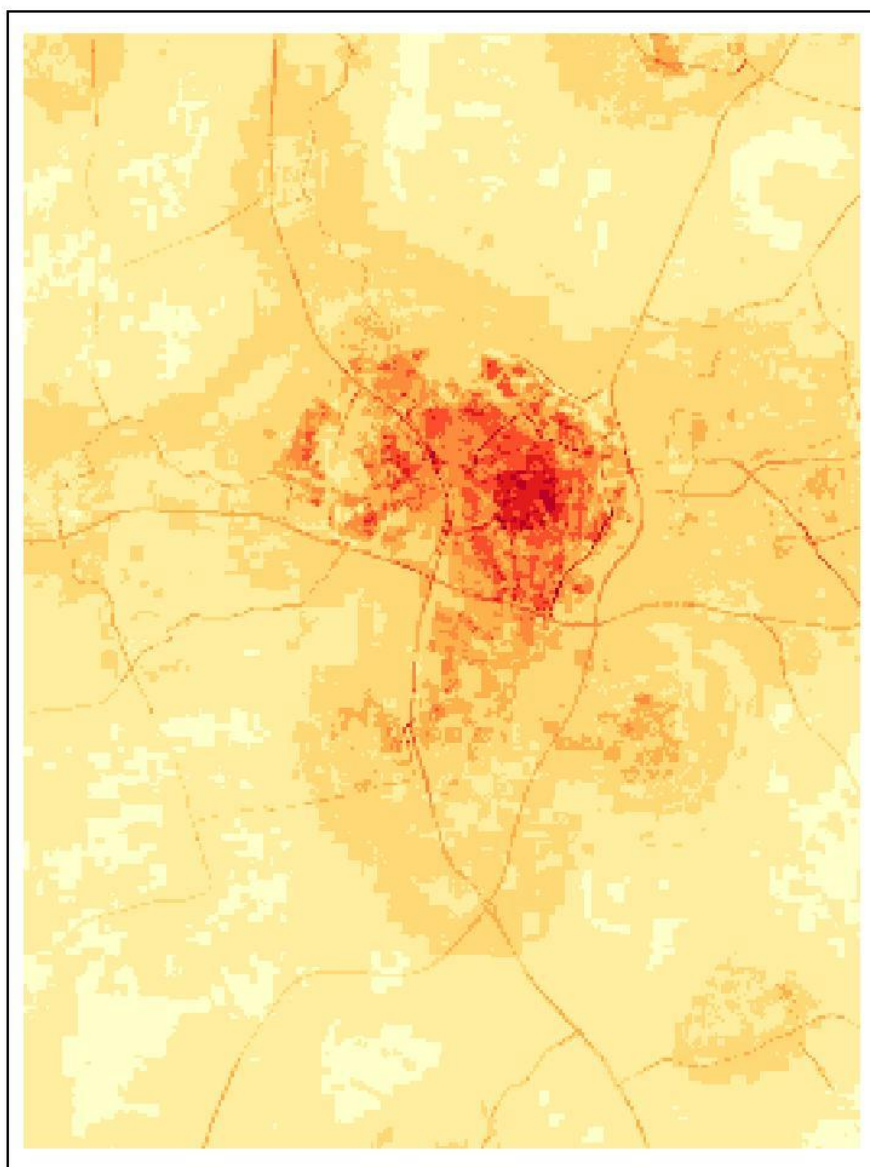

Figure S24 Utrecht predicted NO2 XGBoost (colorblindfriendly)

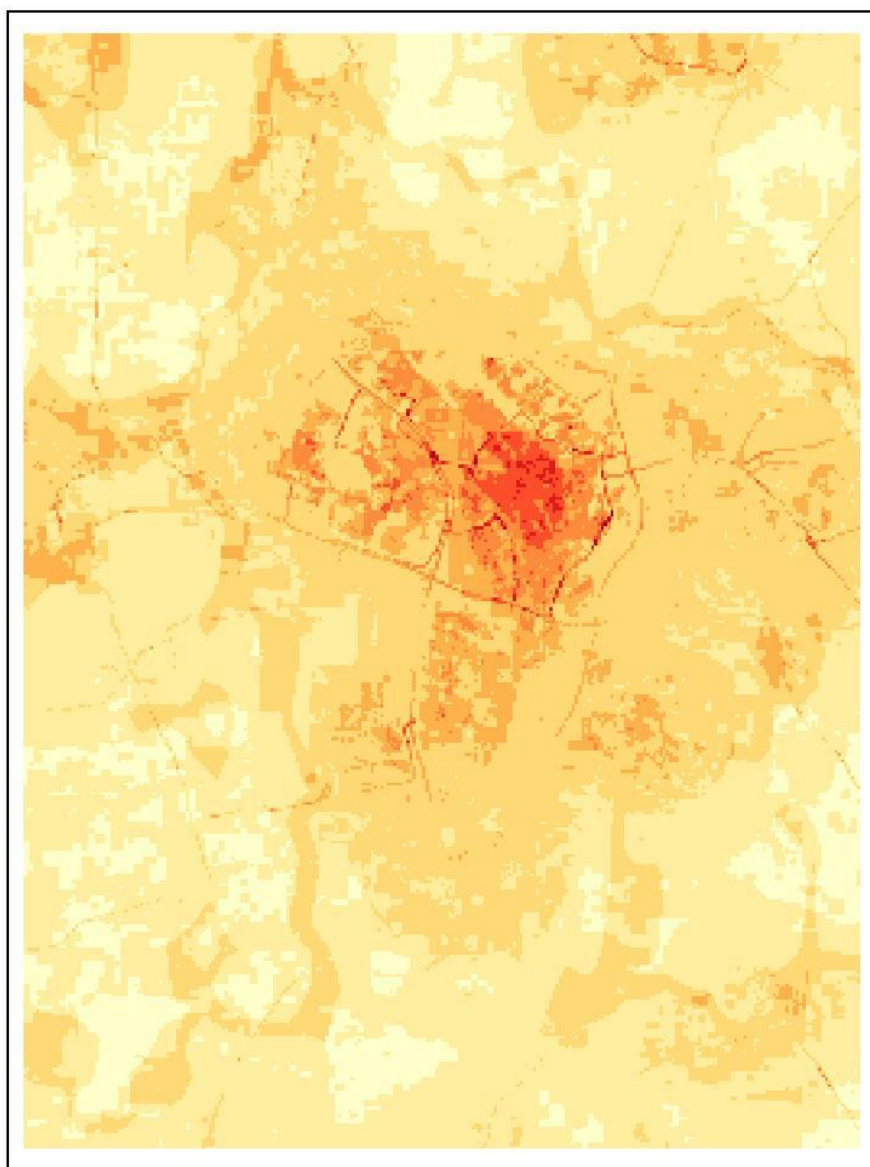

Figure S25 Bayreuth predicted NO2 LASSO (colorblindfriendly)

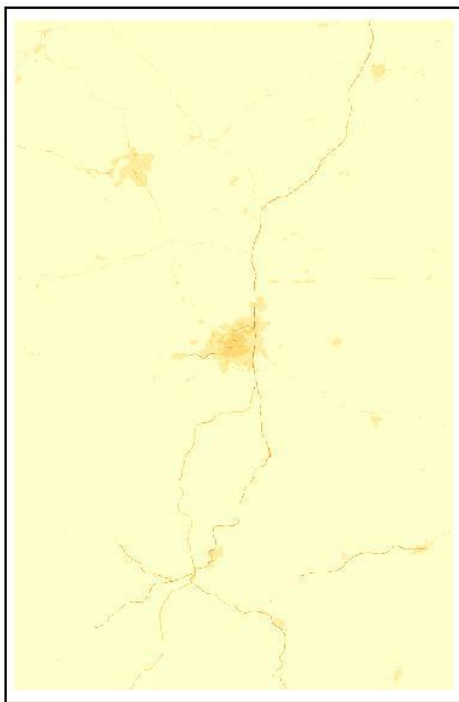

Figure S26 Bayreuth predicted NO2 LightGBM (colorblindfriendly)

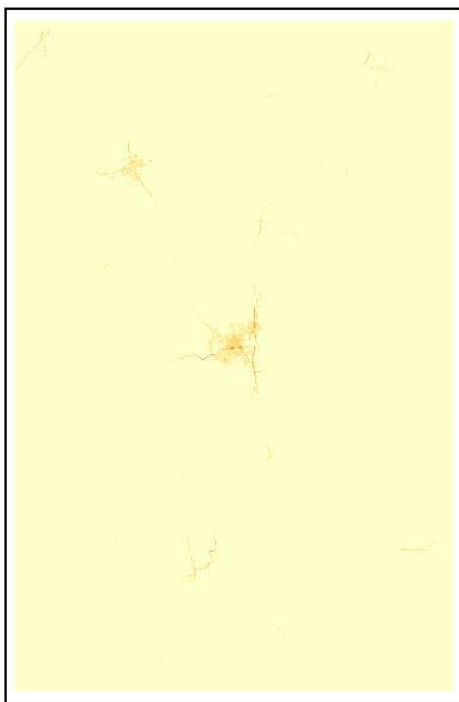

Figure S27 Bayreuth predicted NO2 XGBoost (colorblindfriendly)

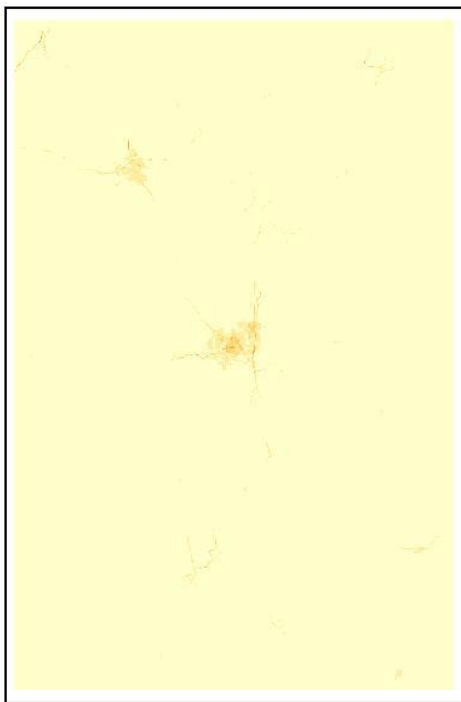

Figure S28 Bayreuth zoomed in predicted NO2 LASSO (colorblindfriendly)

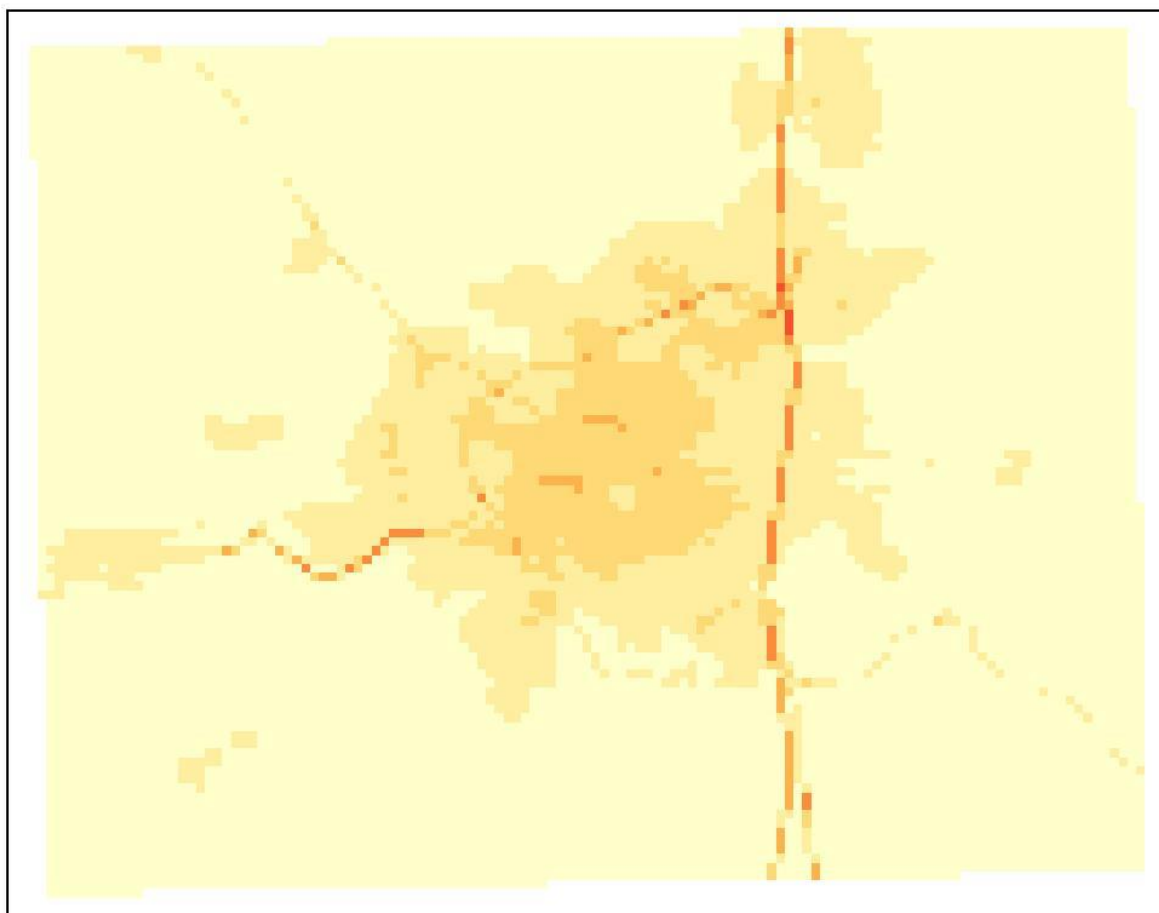

Figure S29 Bayreuth zoomed in predicted NO2 LightGBM



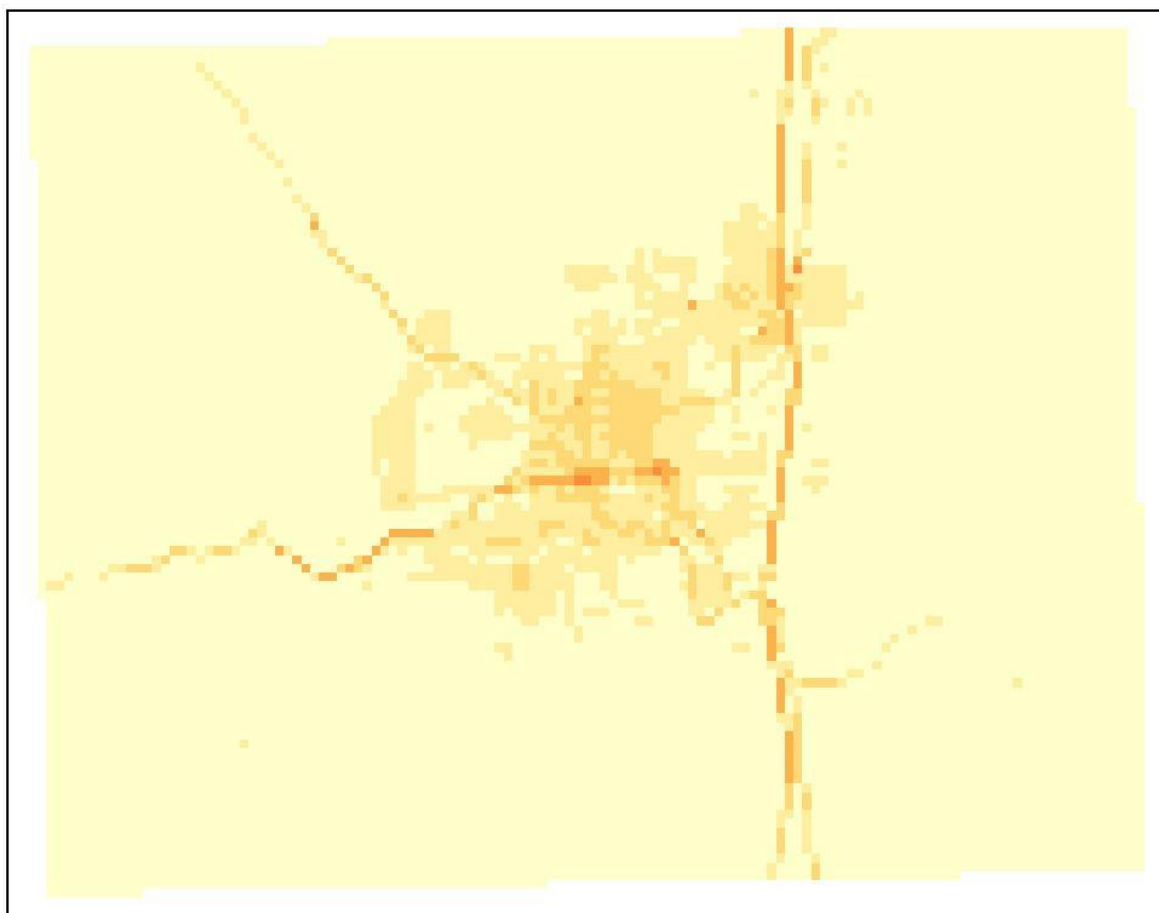

Figure S30 Bayreuth zoomed in predicted NO2 XGBoost (colorblindfriendly)

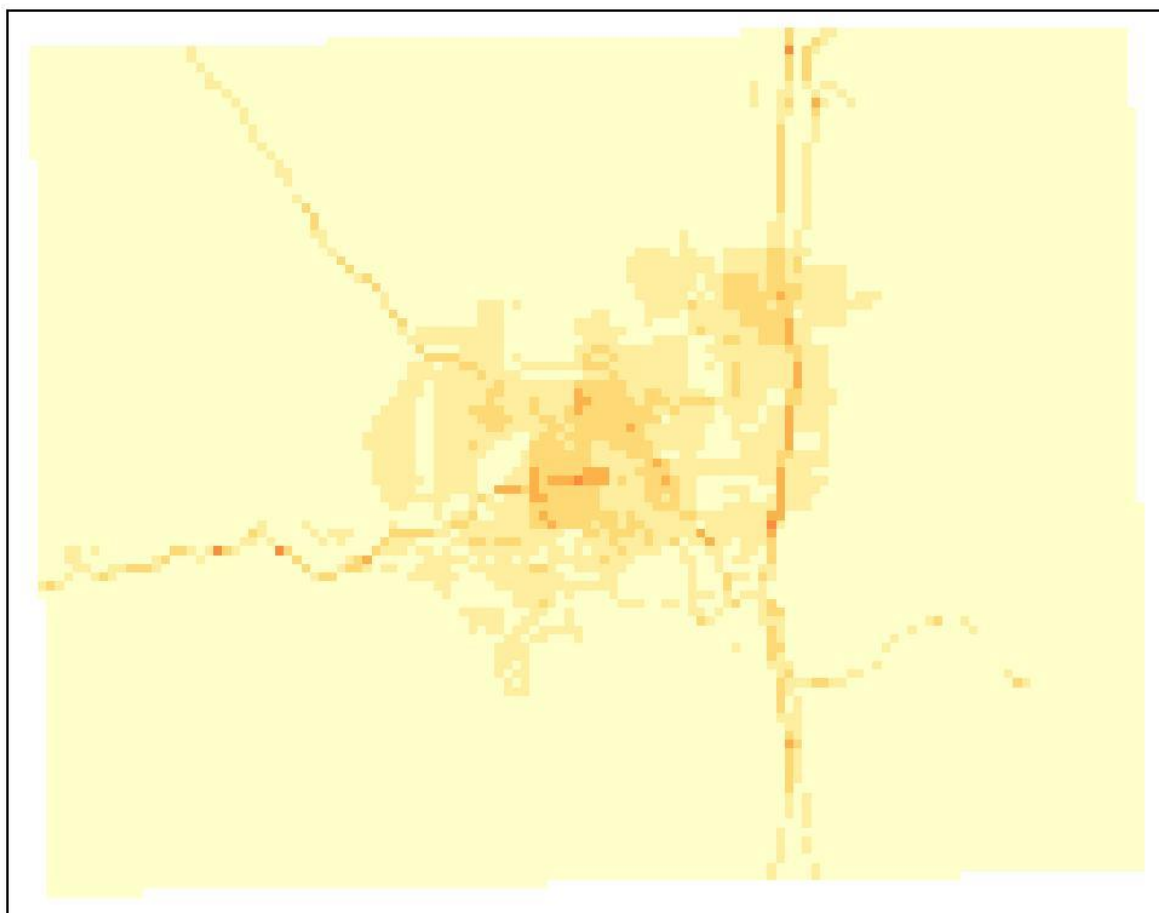

Figure S31 - Distribution predicted NO2 per global model per area of interest (global)

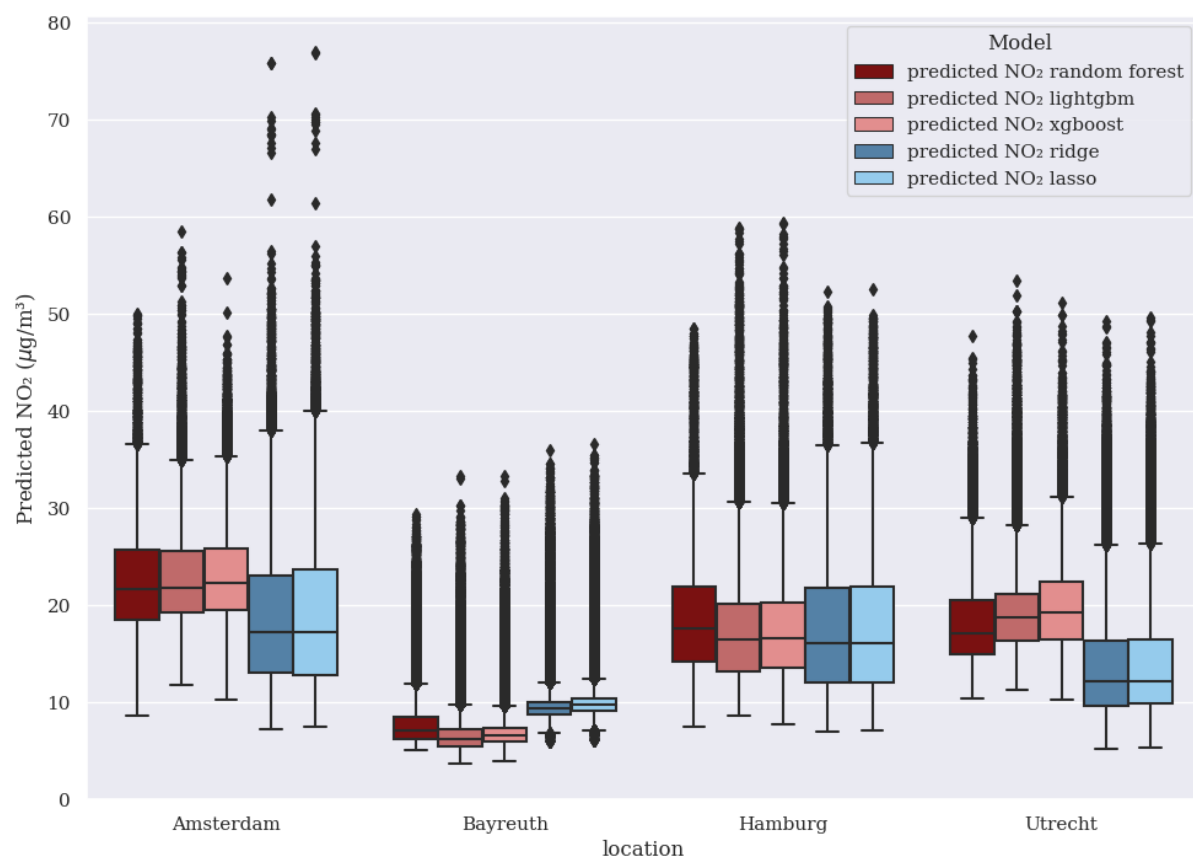

Figure S32 – Spatial distribution of local road class 2 5000 in Amsterdam Area

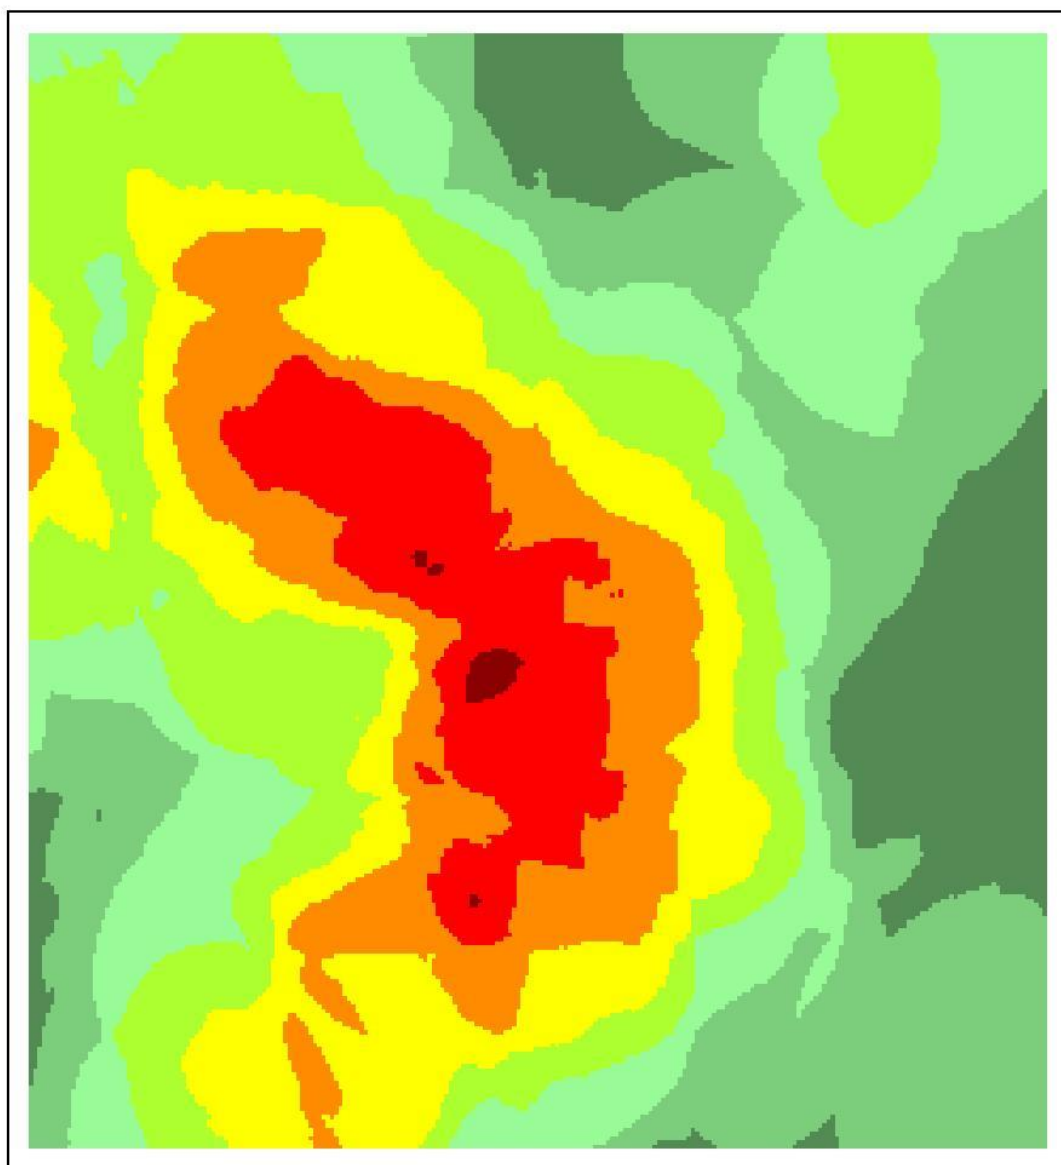

road\_class\_2\_5000

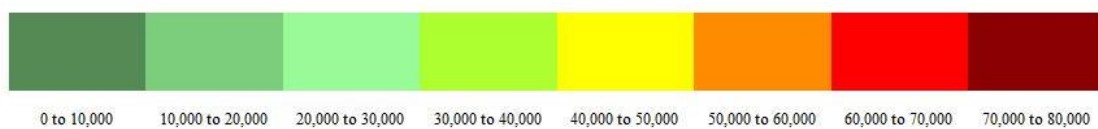

Figure S33 – local predictor nightlight 450

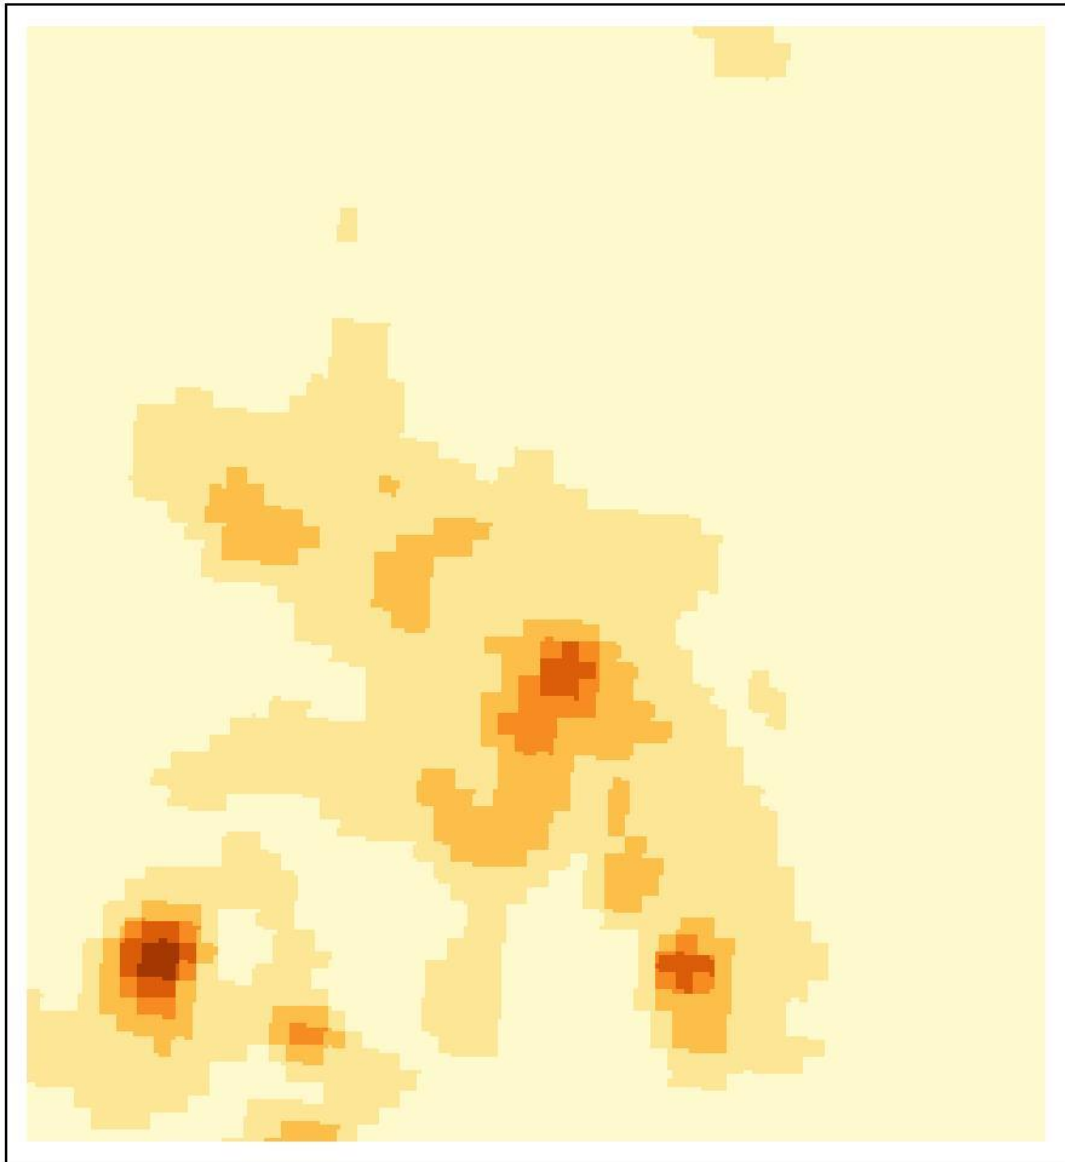

Figure S34 – local predictor nightlight 4950

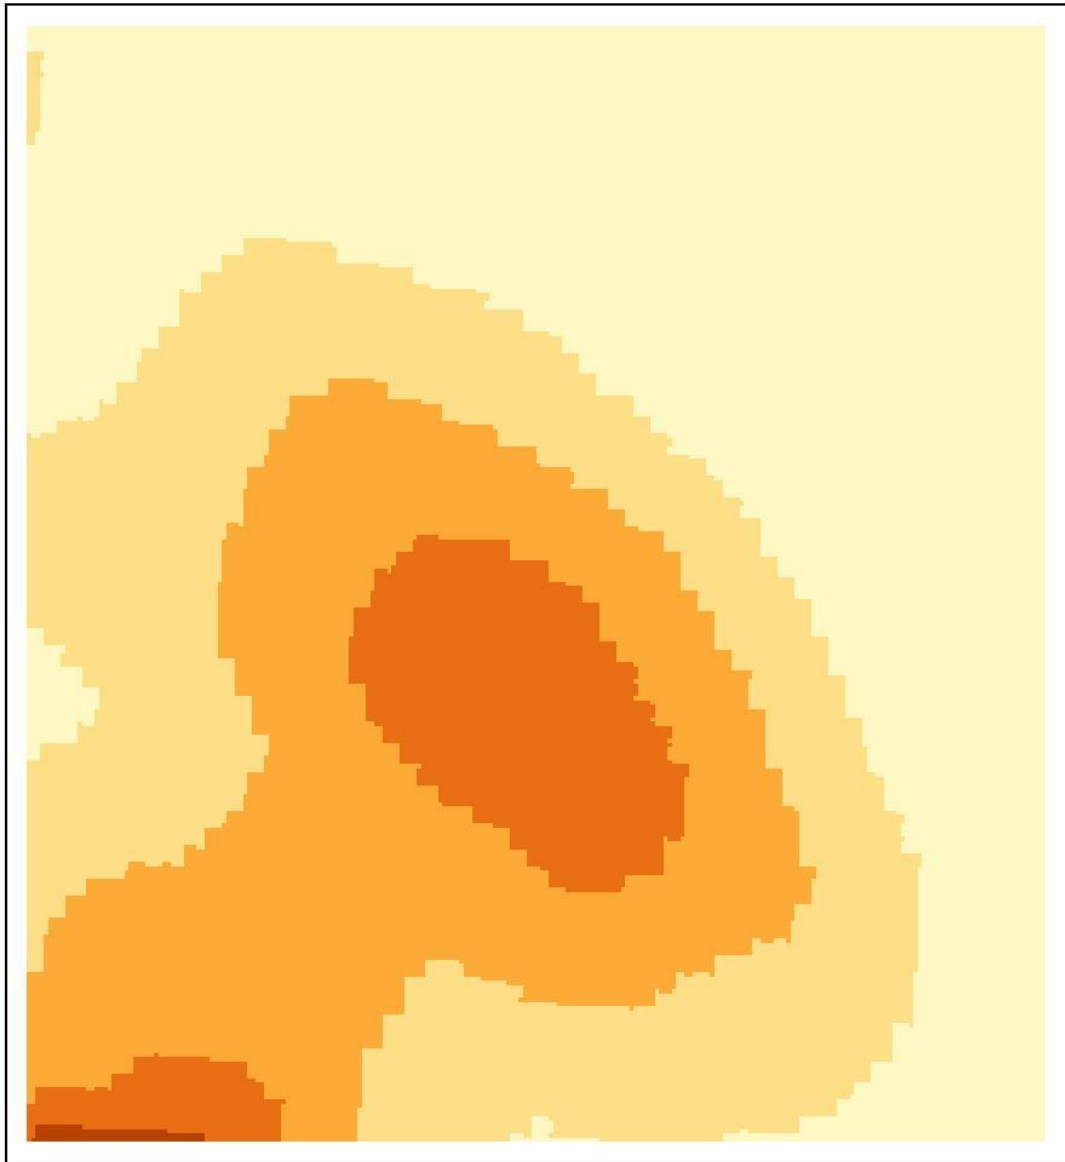

Figure S35 – local predictor population 3000



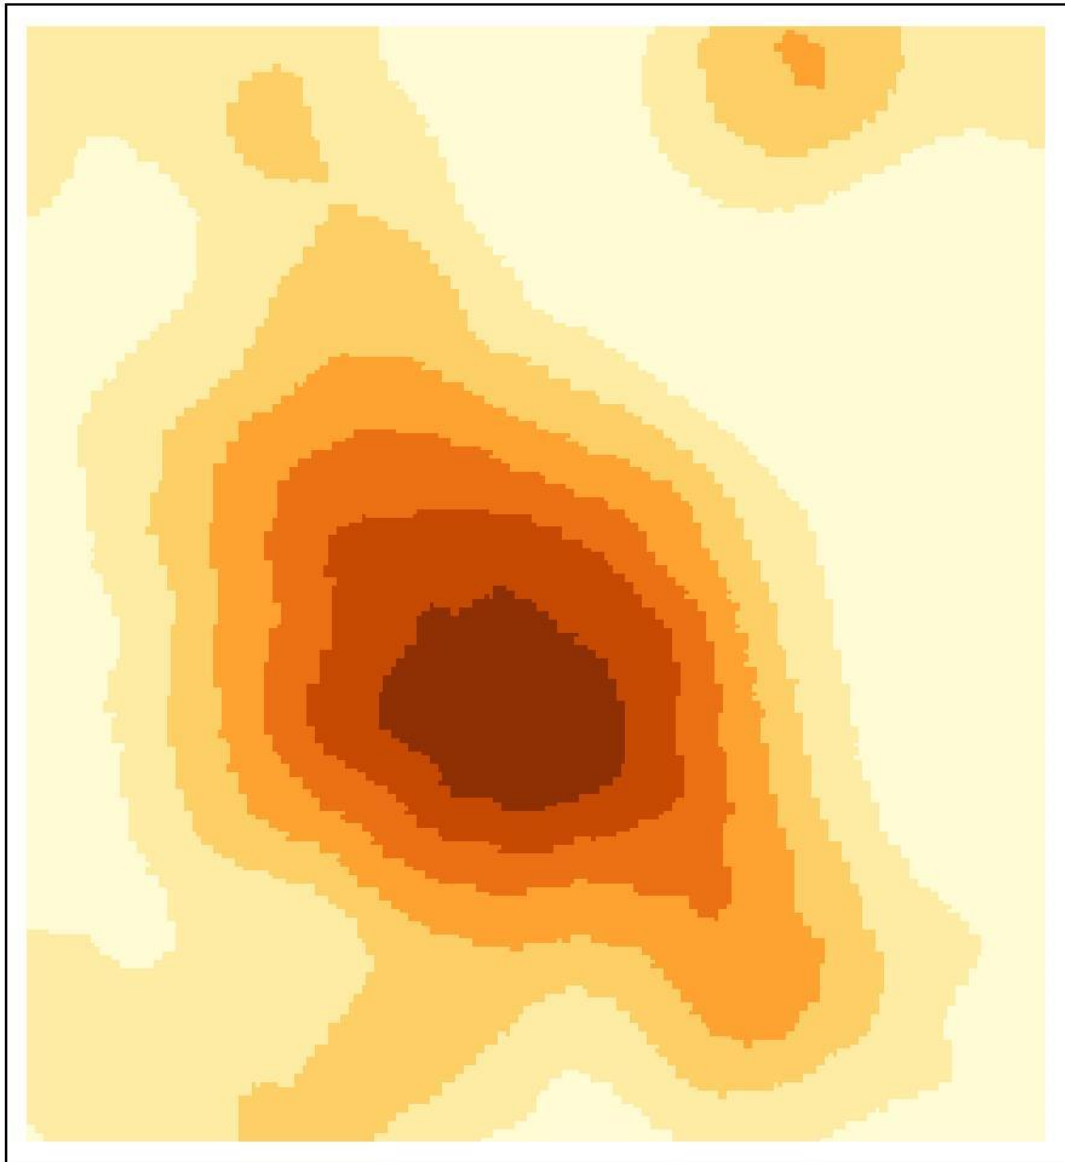

Figure S36 – local predictor road class 1 5000

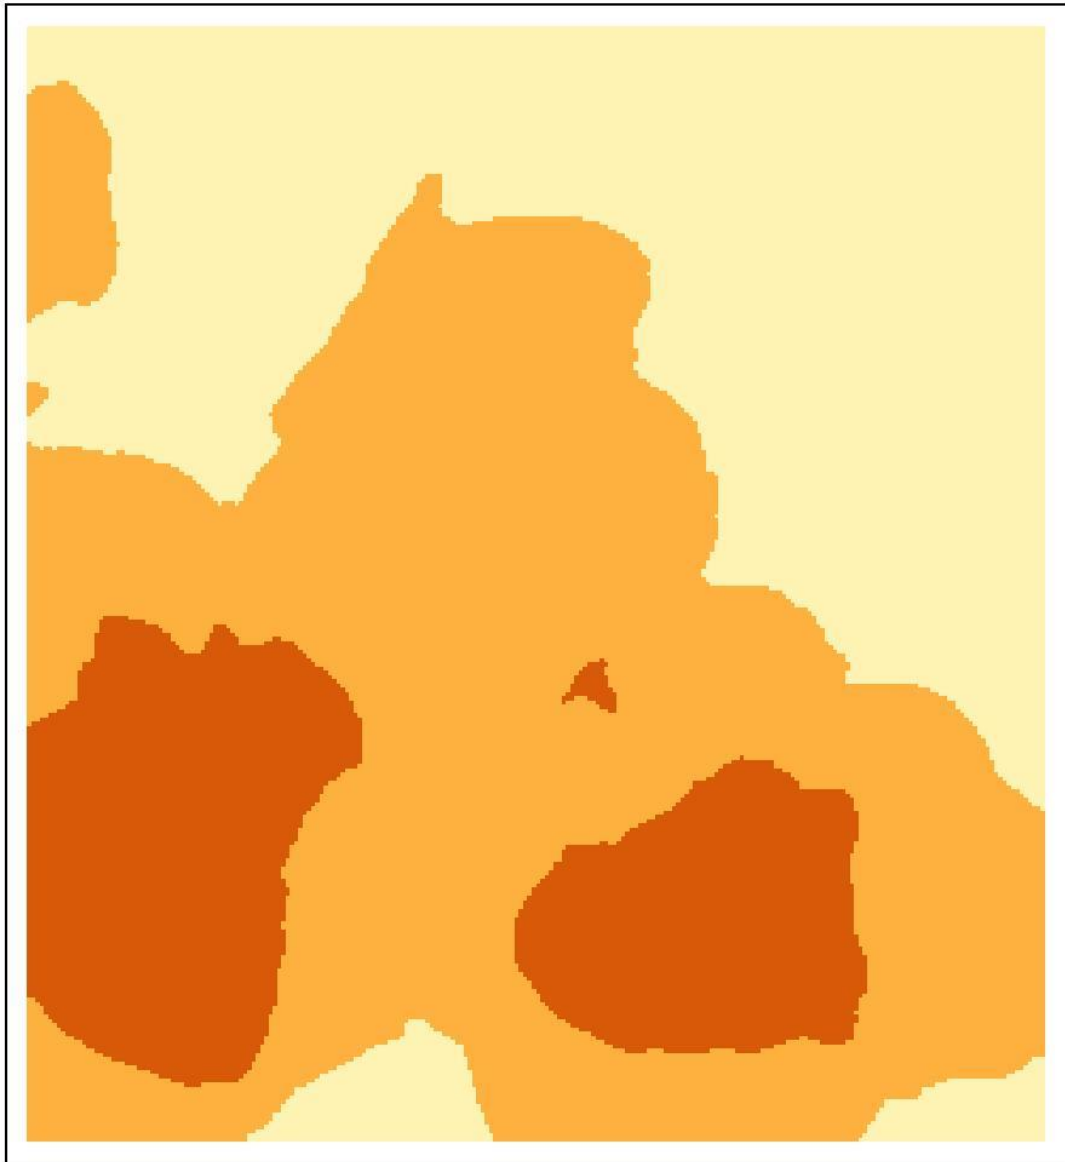

Figure S37 – local predictor road class 2 1000

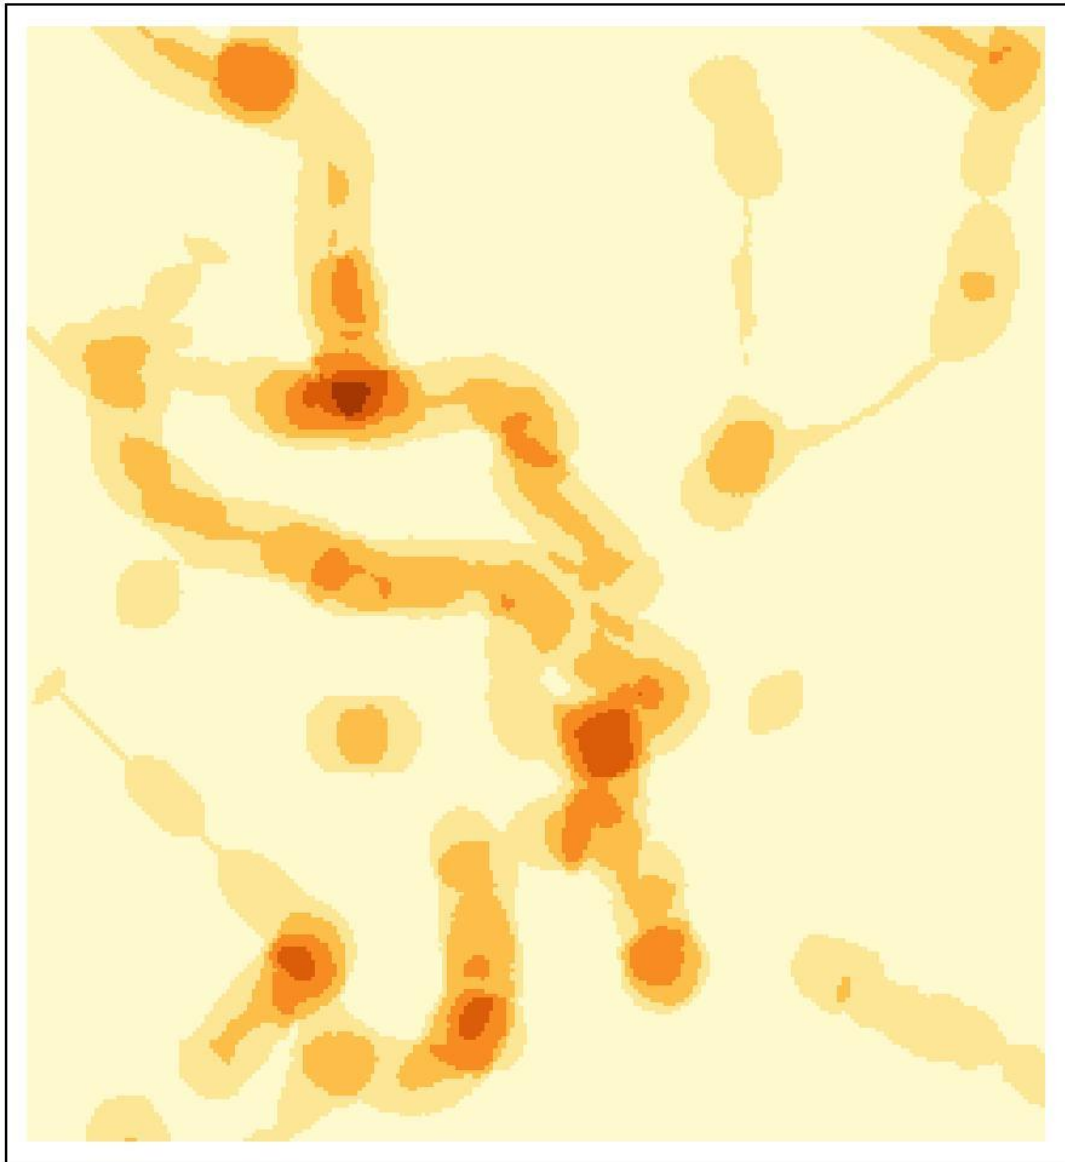

Figure S38 – local predictor road class 2 5000

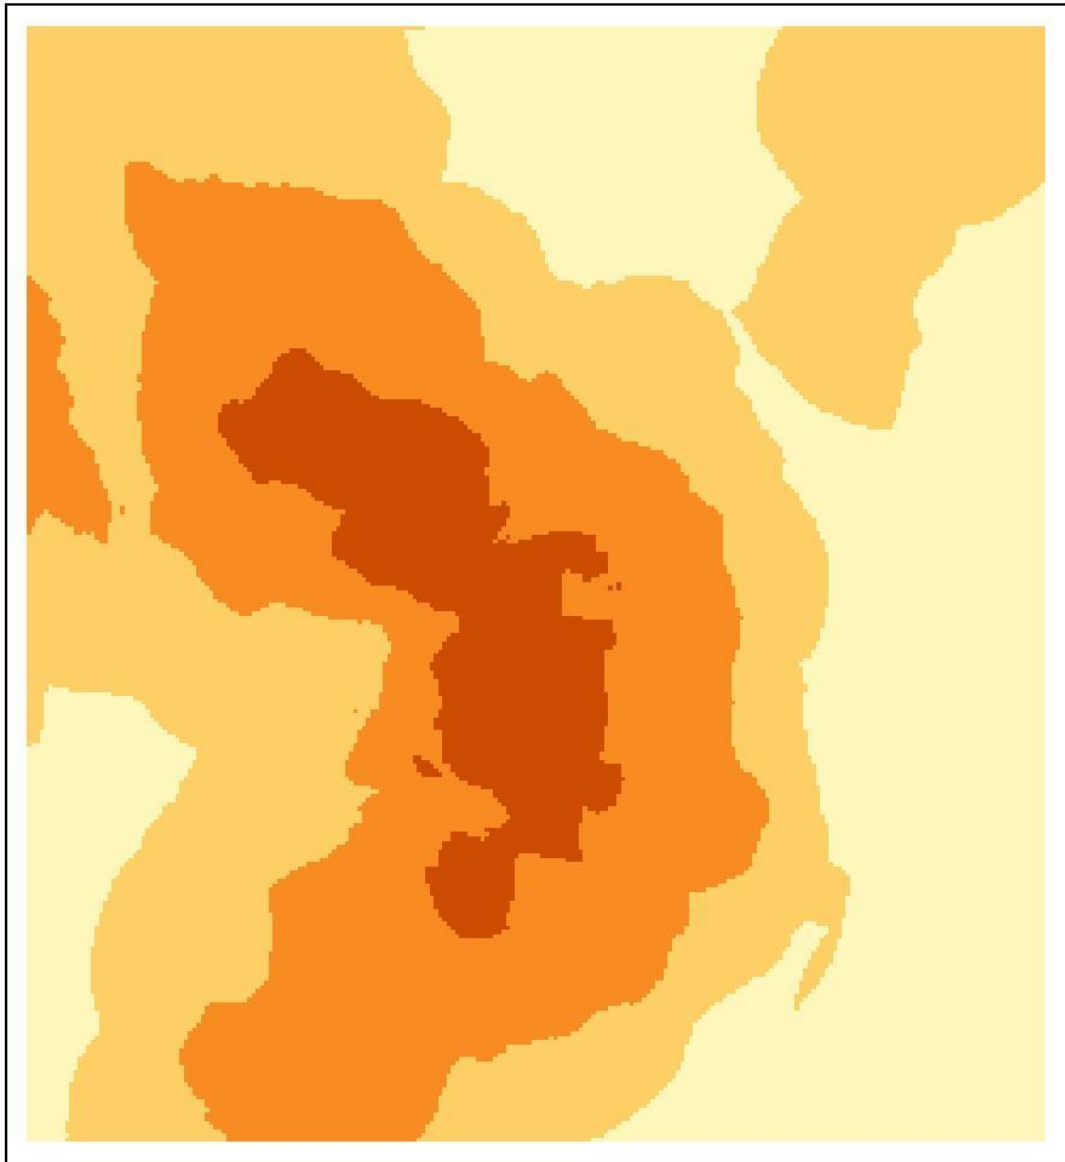

Figure S39 – local predictor road class 3 100

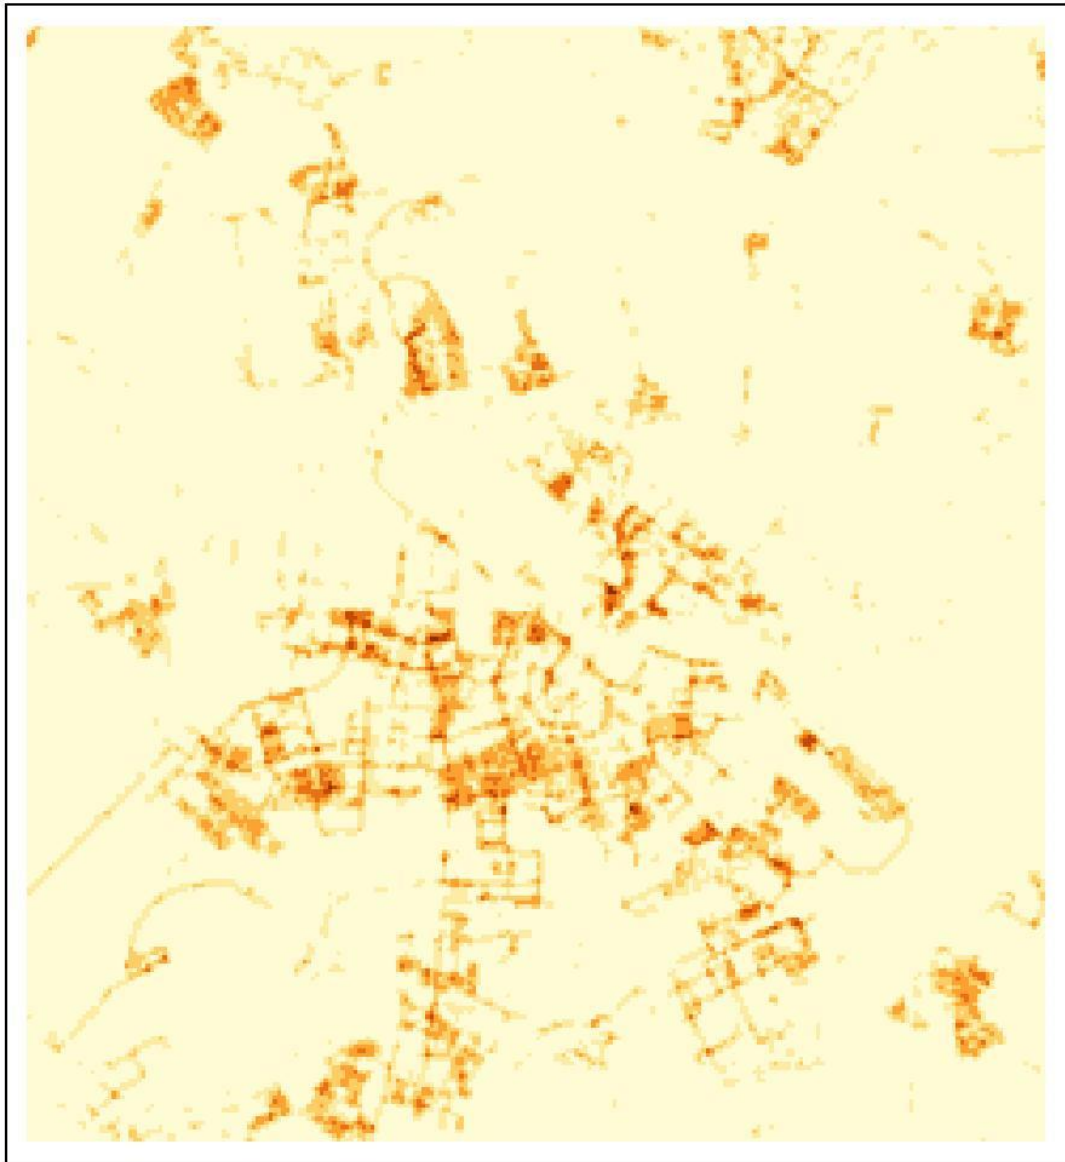

Figure S40 – local predictor road class 3 300

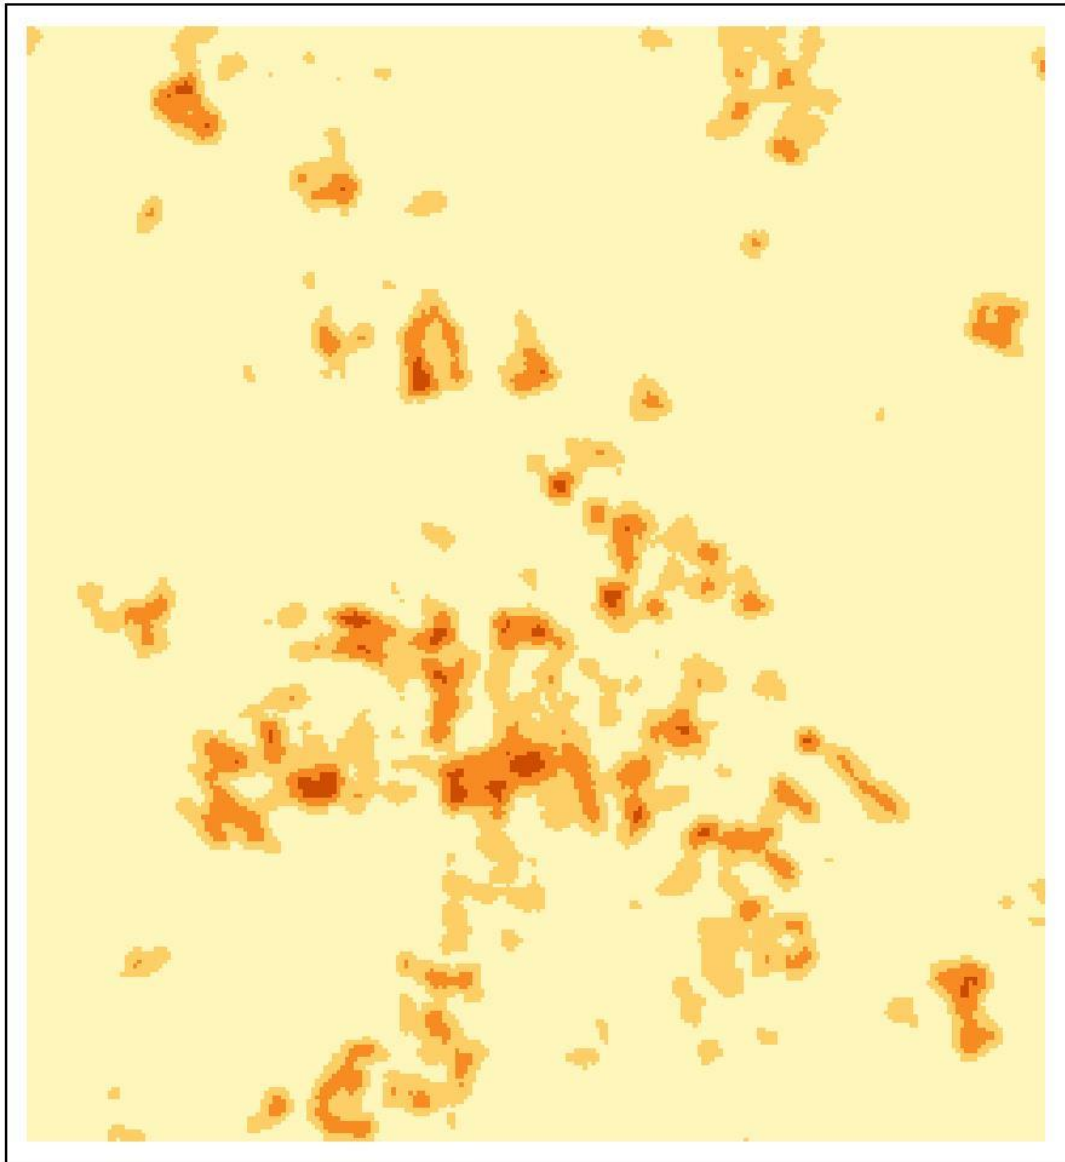

Figure S41 – local predictor trafbuf50



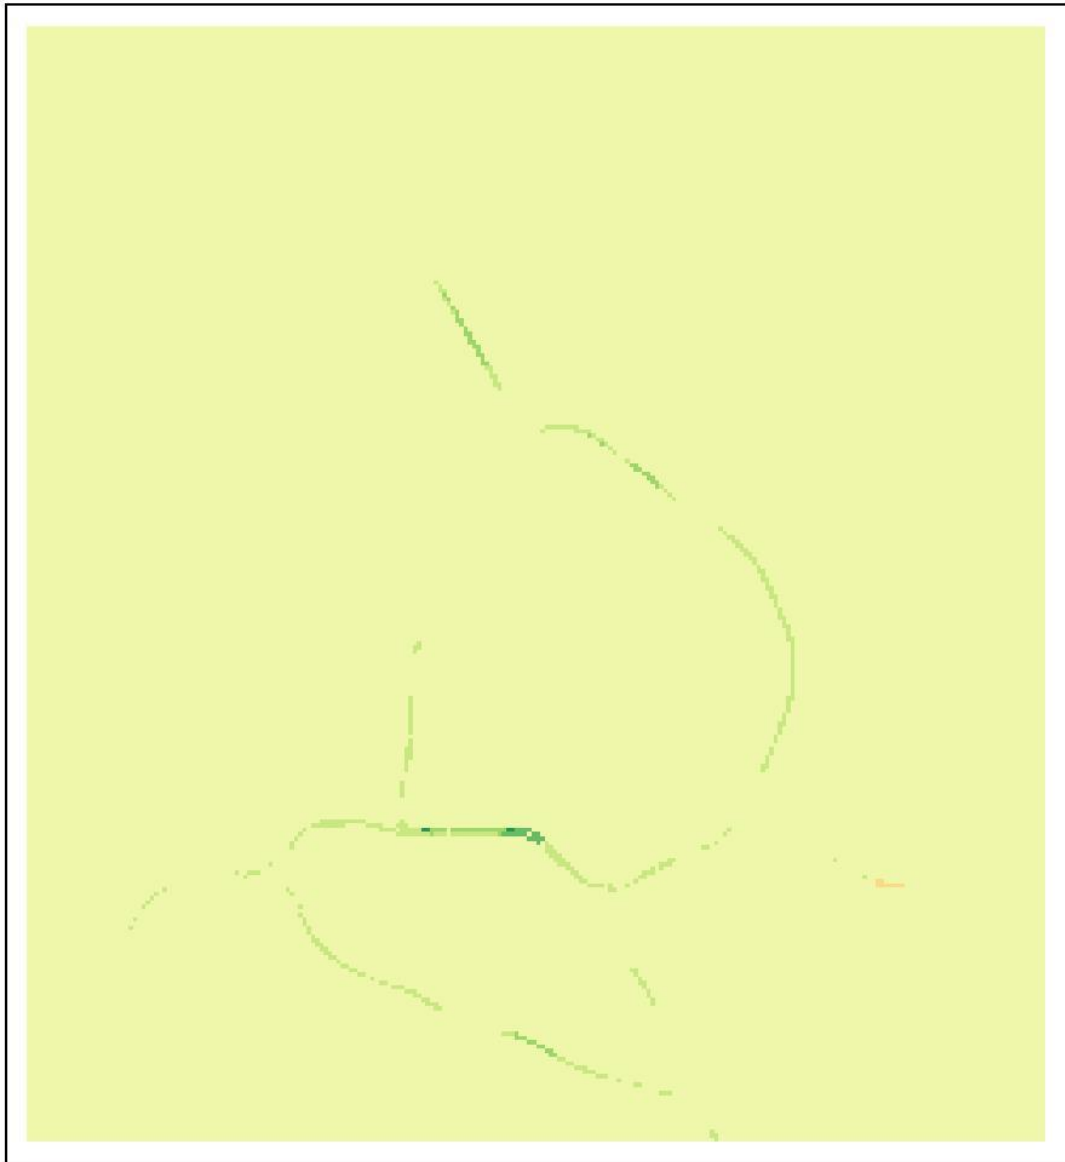

Figure S42 – Spatial distribution per spatial group – local - GRID100mx100m

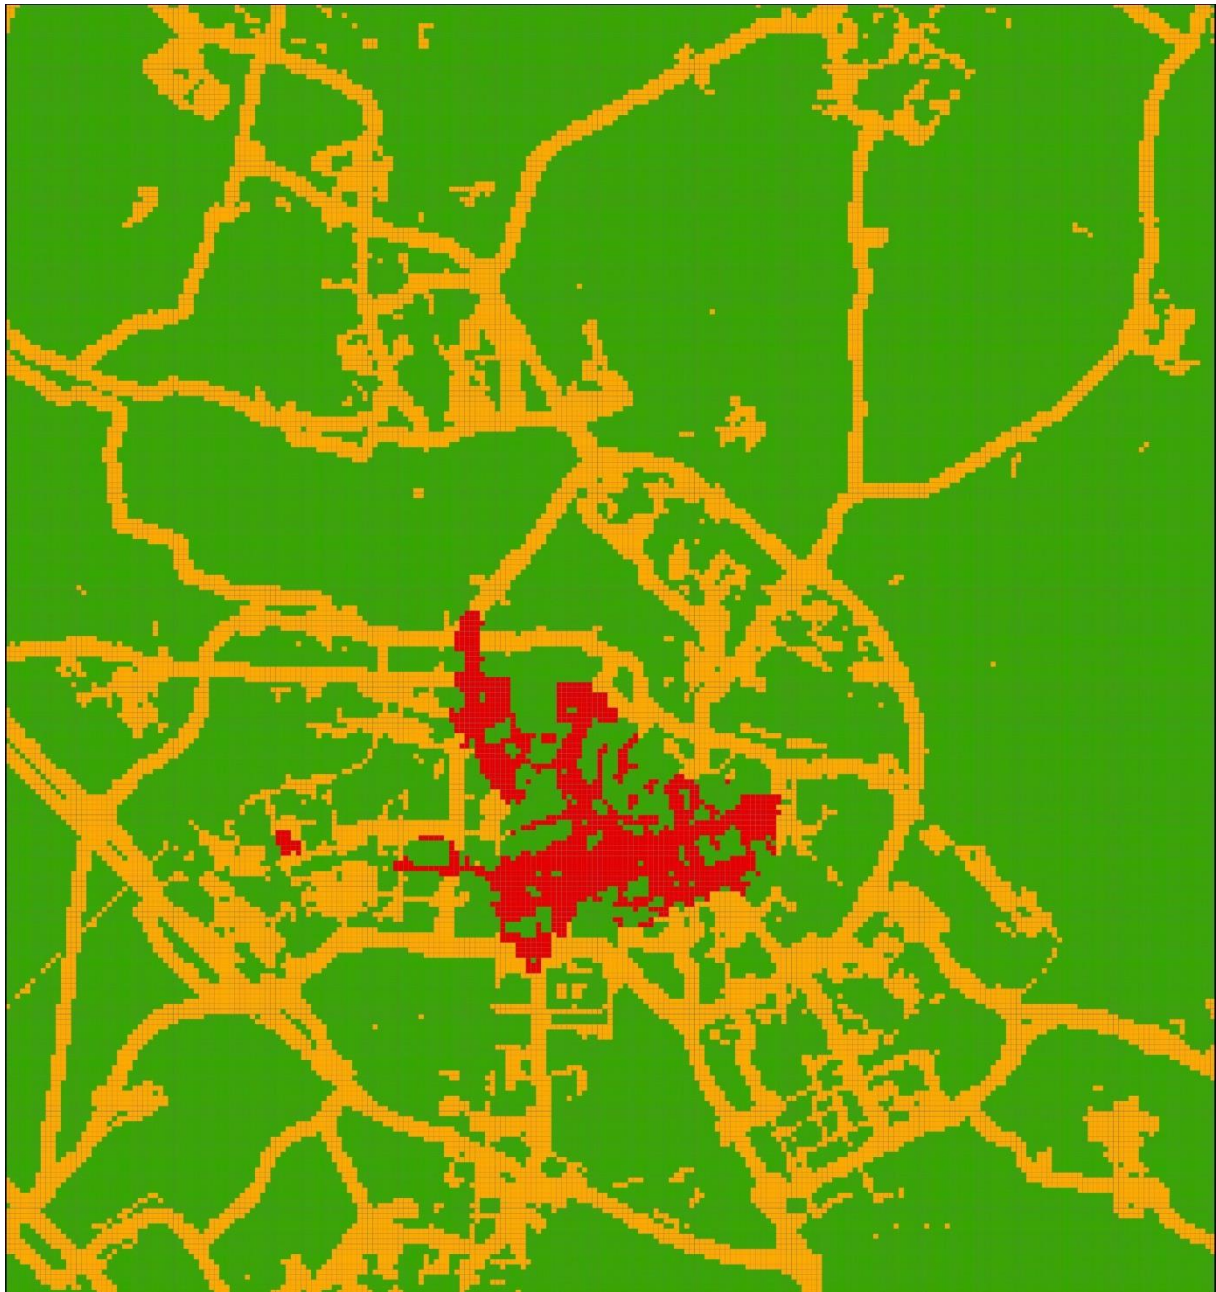

Spatial group

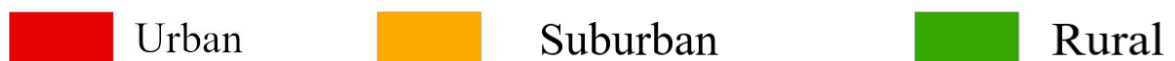

Figure S43 – Local data distribution per spatial group - nightlight\_450

*\*In the main text, "suburban" refers to low population areas, while "rural" refers to far from road areas.*

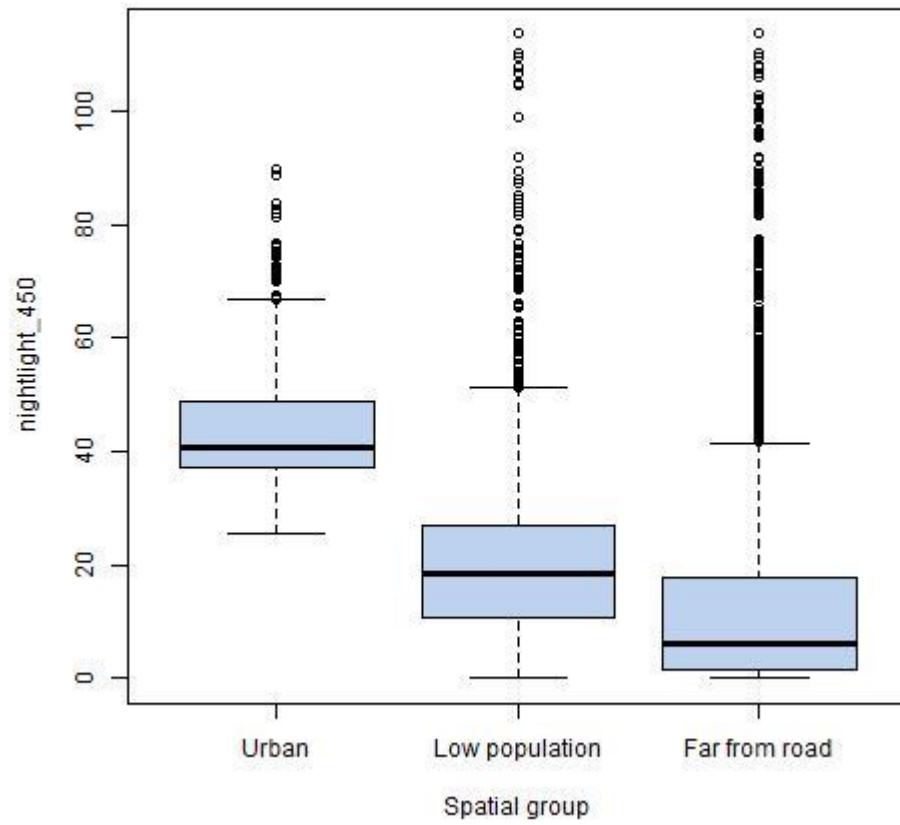

Figure S44 - Local data distribution per spatial group - nightlight\_4950

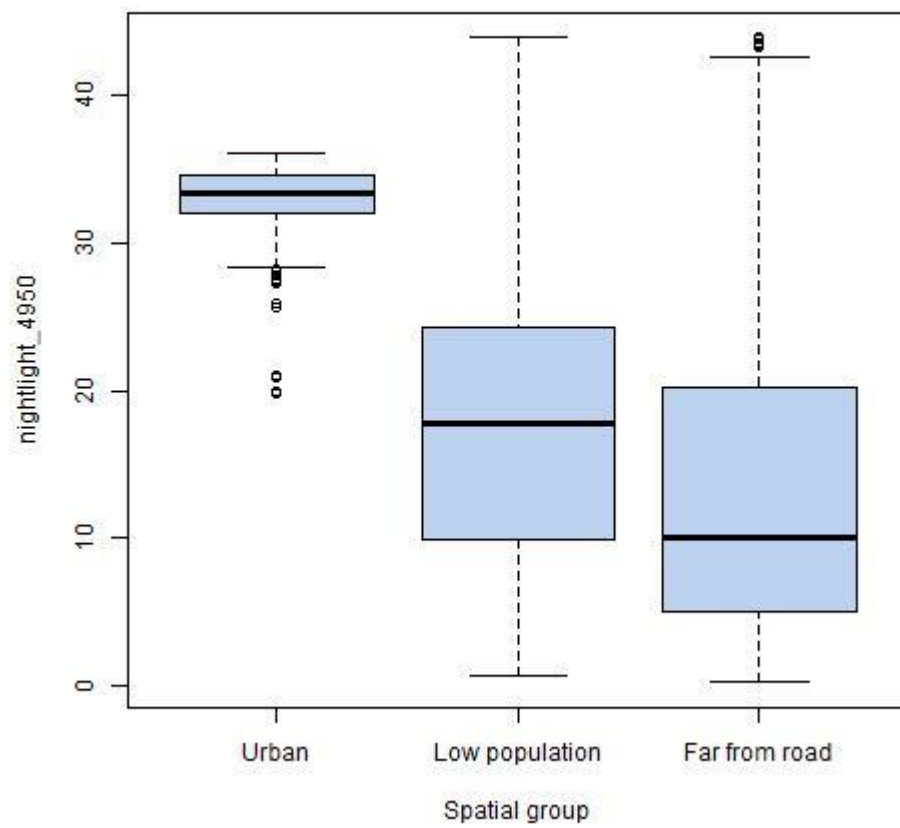

Figure S45 Local data distribution per spatial group – population 3000

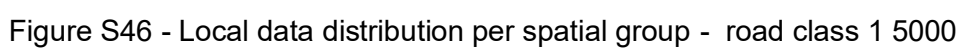

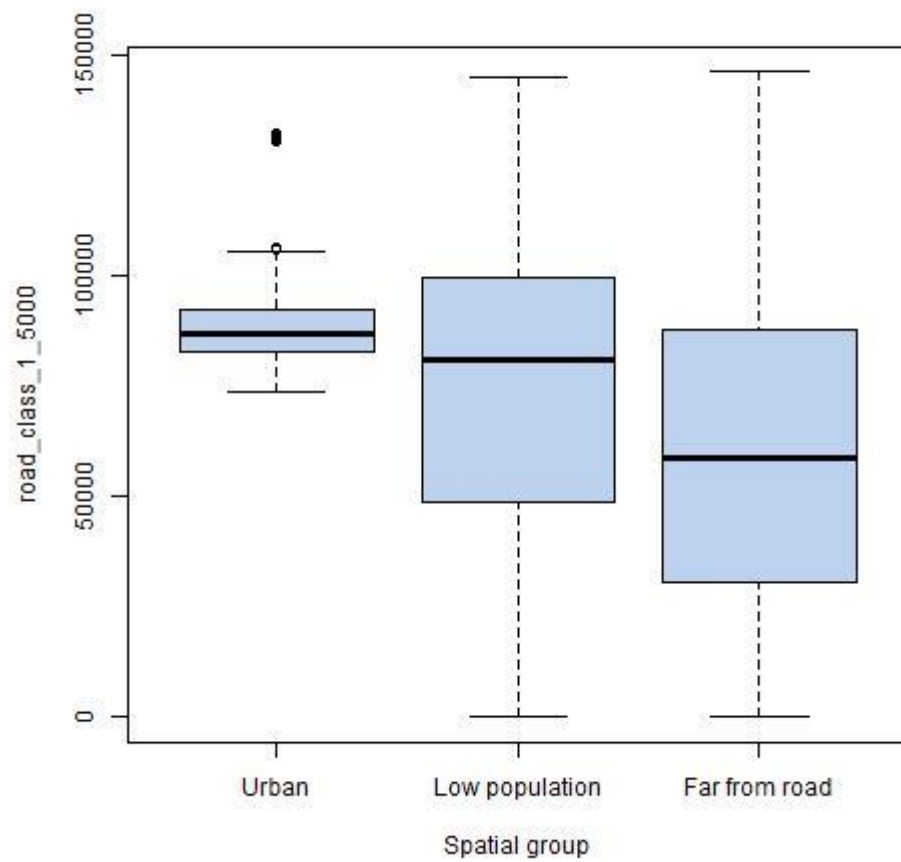

Figure S47 - Local data distribution per spatial group - road class 2 1000



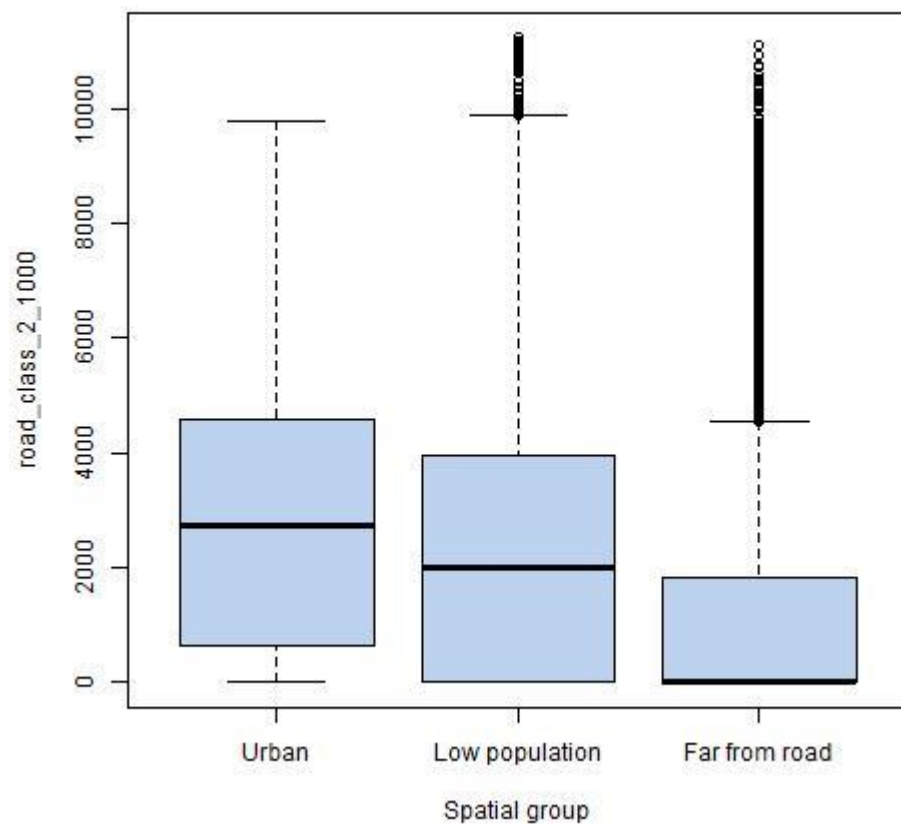

Figure S48 - Local data distribution per spatial group - road class 2 5000

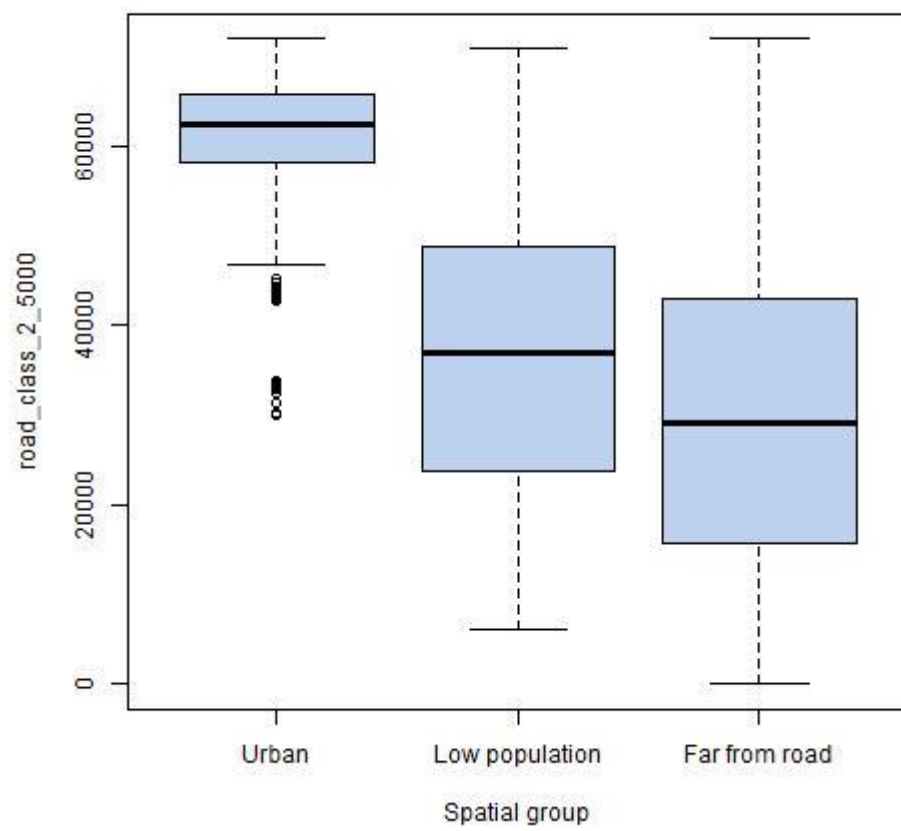

Figure S49 - Local data distribution per spatial group - road class 3 100

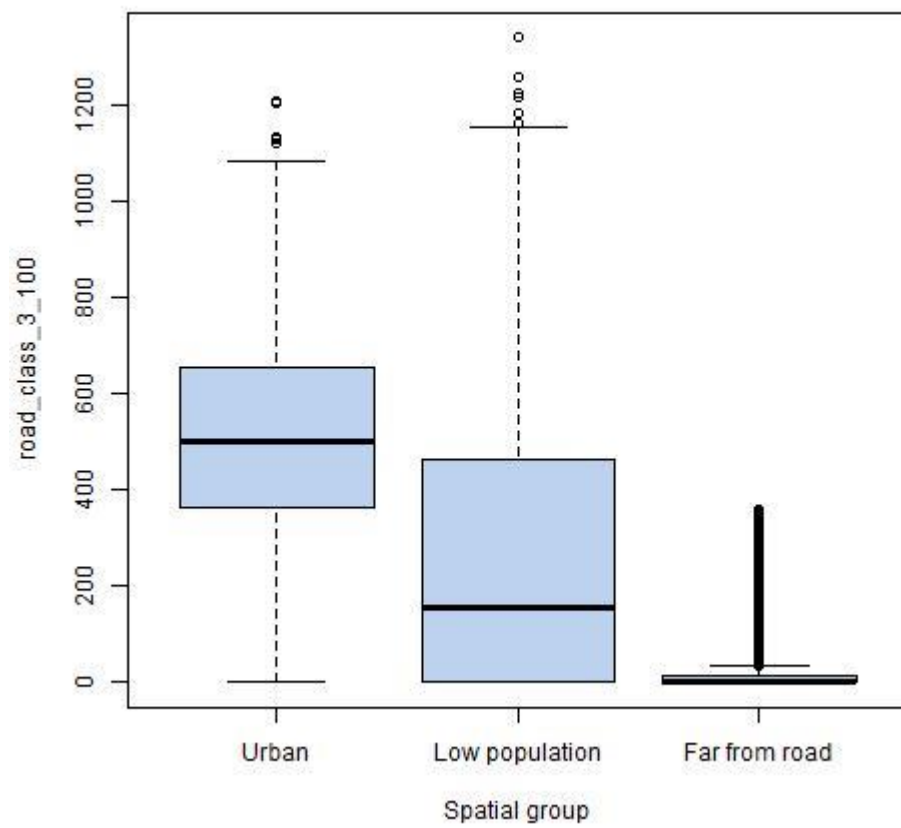

Figure S50 - Local data distribution per spatial group - road class 3 300

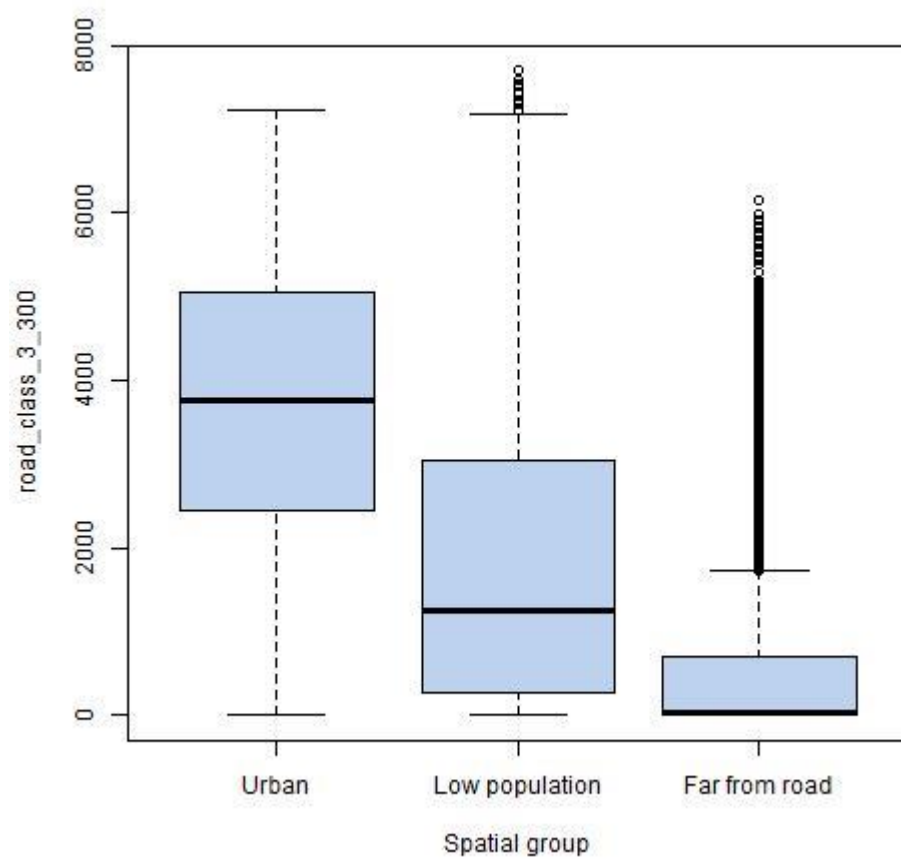

Figure S51 - Local data distribution per spatial group - trafbuf50

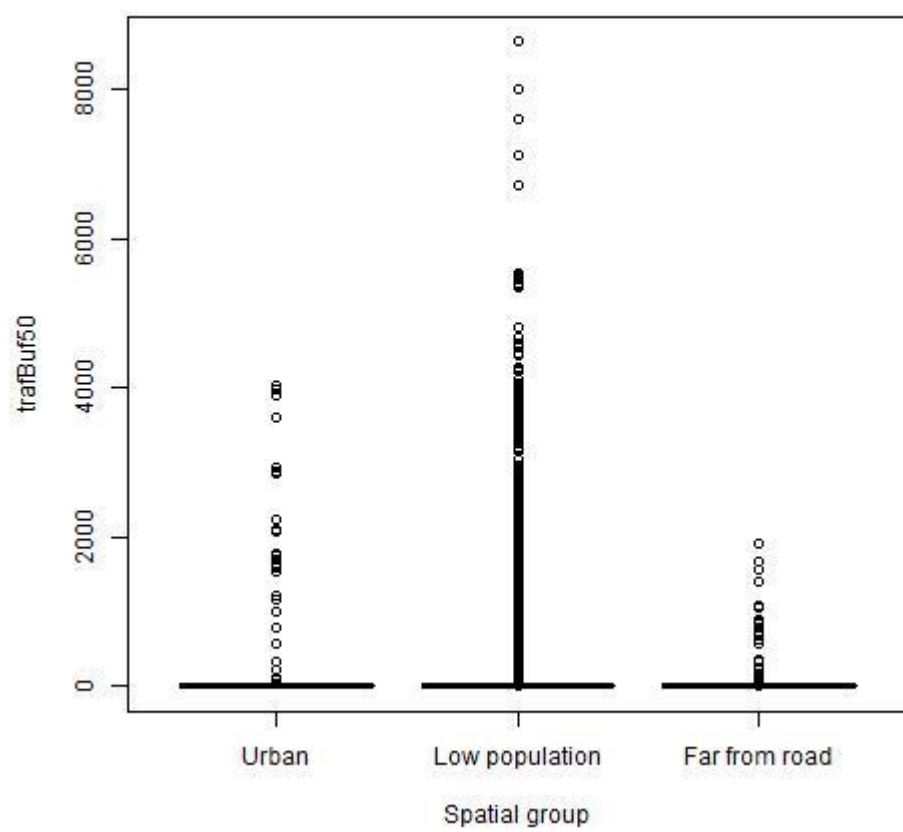

Figure S52 Predicted NO<sub>2</sub> values by local models no outliers

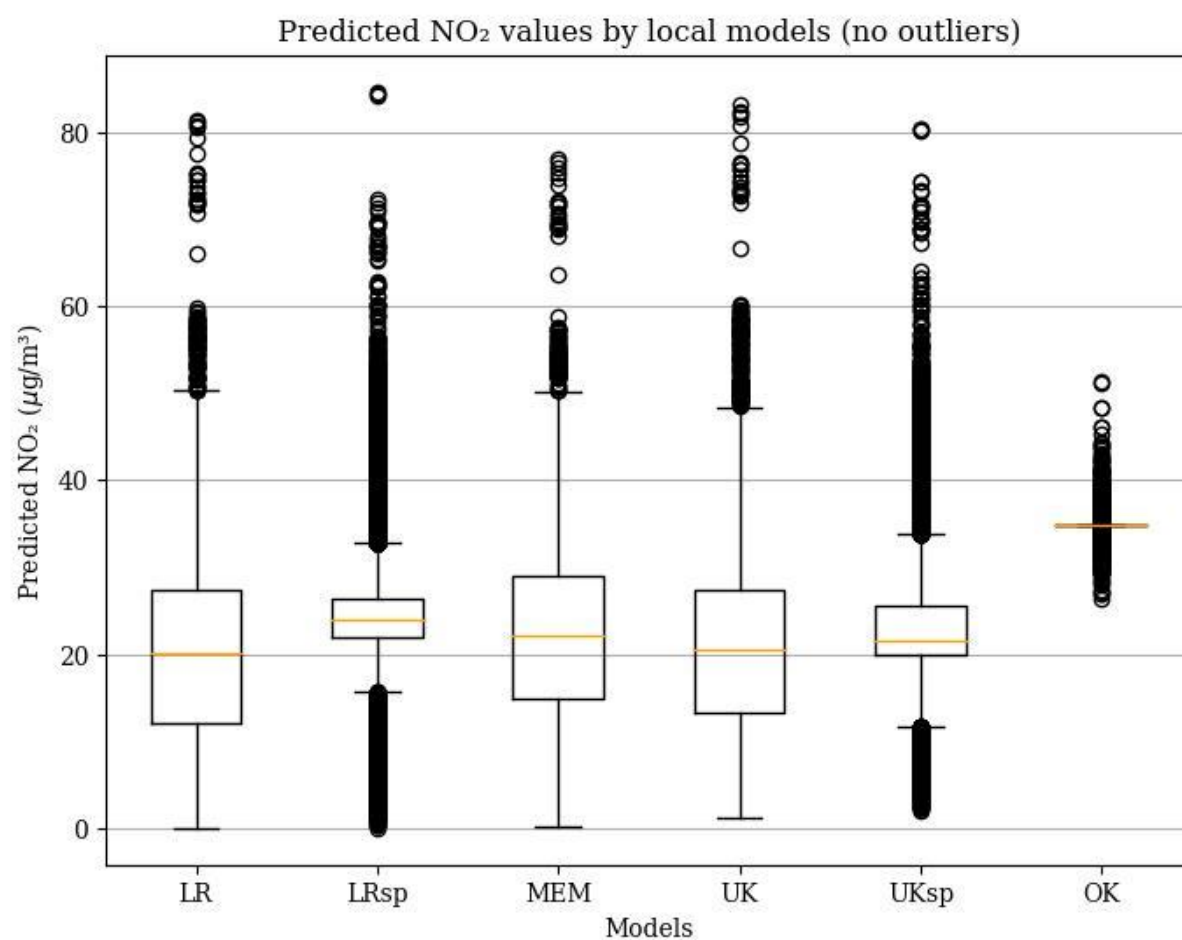

Figure S53 NO<sub>2</sub> map Kerckhoffs



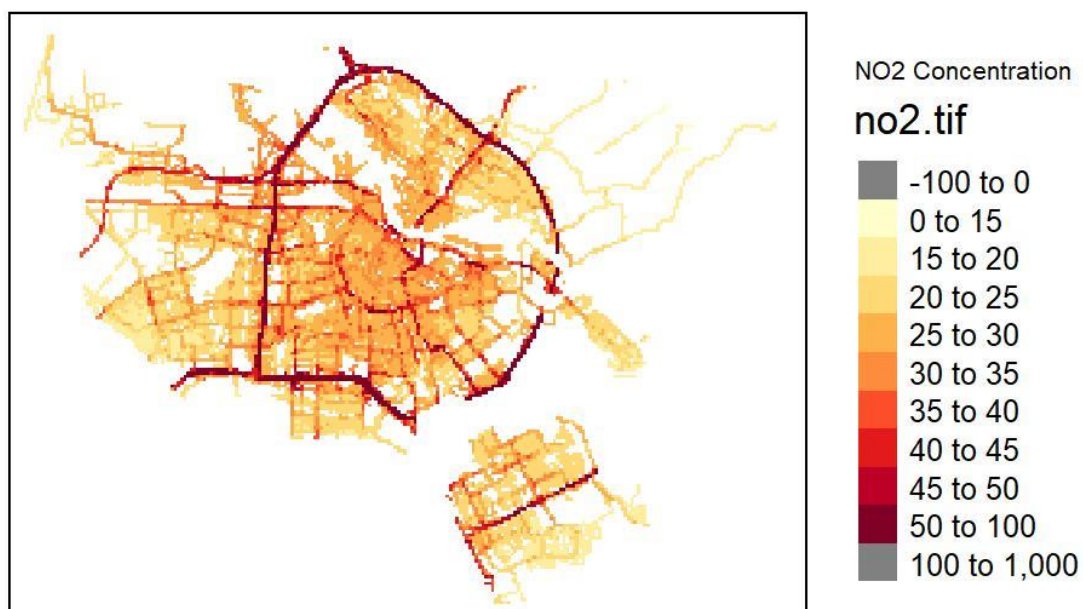

Figure S54. Comparing model predictions whereby the numbers equal the Pearson correlation coefficient. RF: Random Forest, XGB: XGBoost, LR: linear regression, LRsp: Linear Regression accounting for spatial groups, MEM: Mixed-Effects Model, UK: Universal Kriging,

UKsp: Universal Kriging accounting for spatial groups, OK: Ordinary Kriging, no2: mobile NO\$ {2}\$ map.

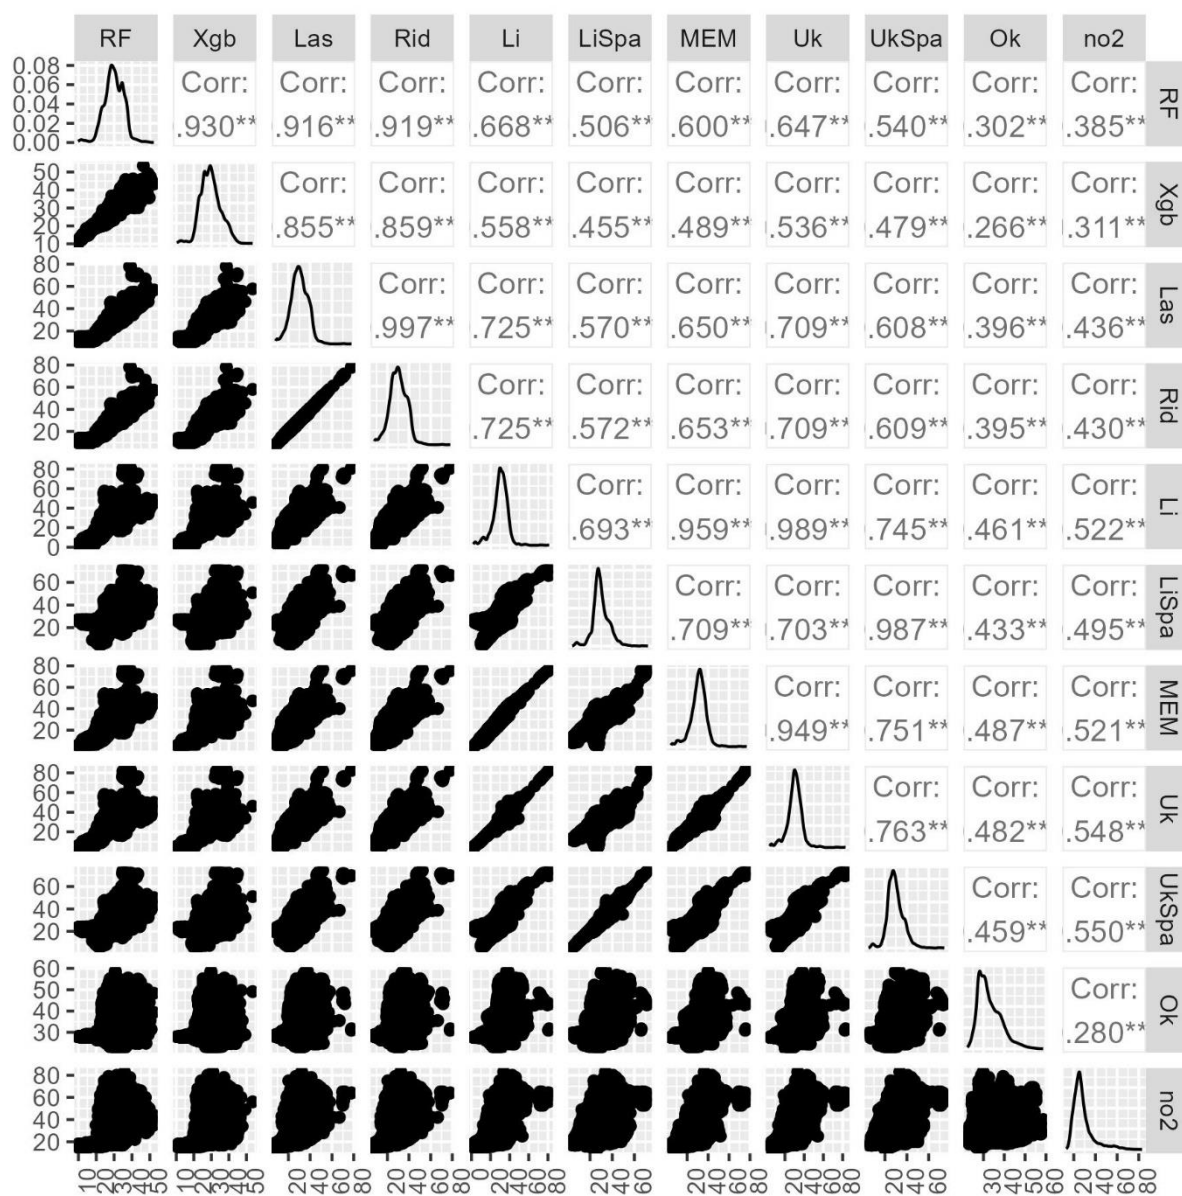

Figure S55 Spatial residual random forest (Predicted NO2 values by random forest - NO2 map Kerckhoffs)

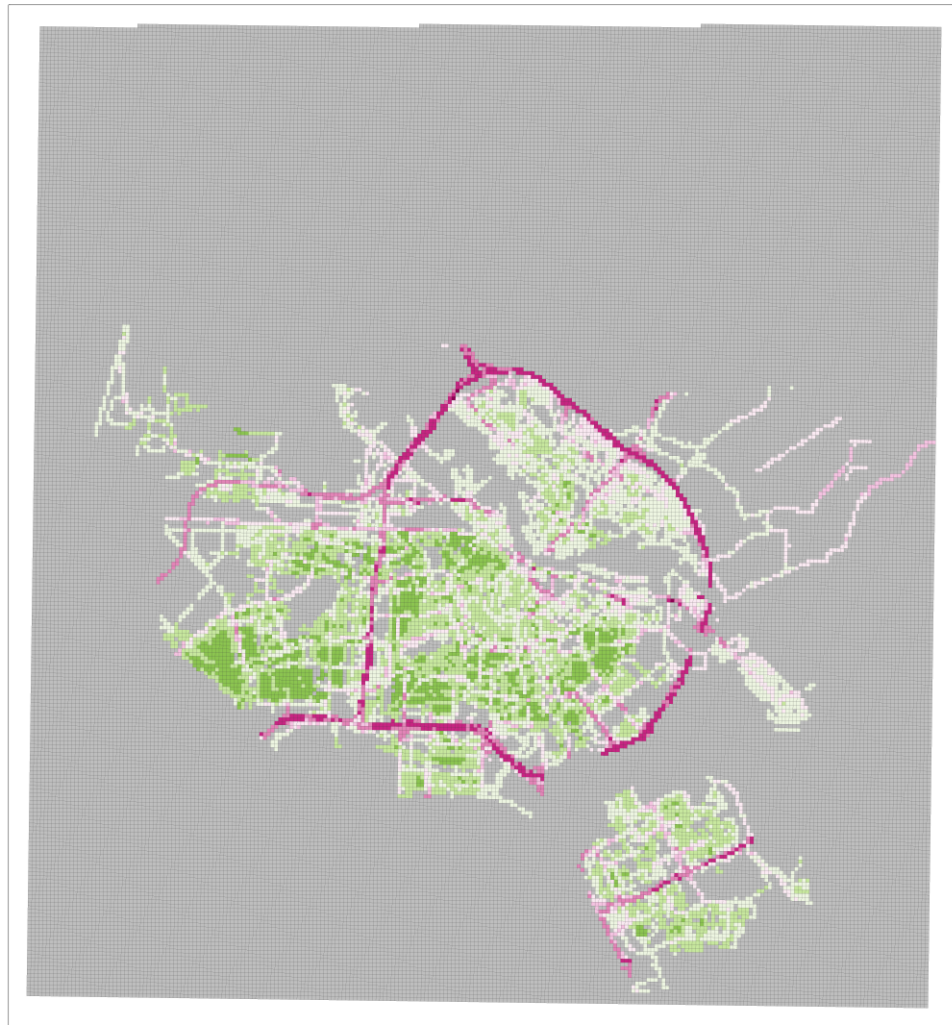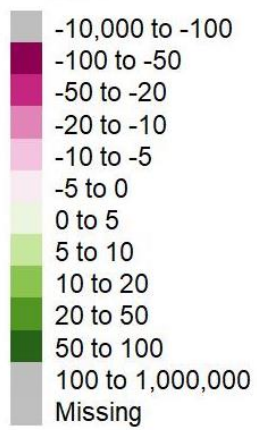

Figure S56 - Spatial residual LightGBM (Predicted NO2 values by LightGBM model - NO2 map Kerckhoffs)

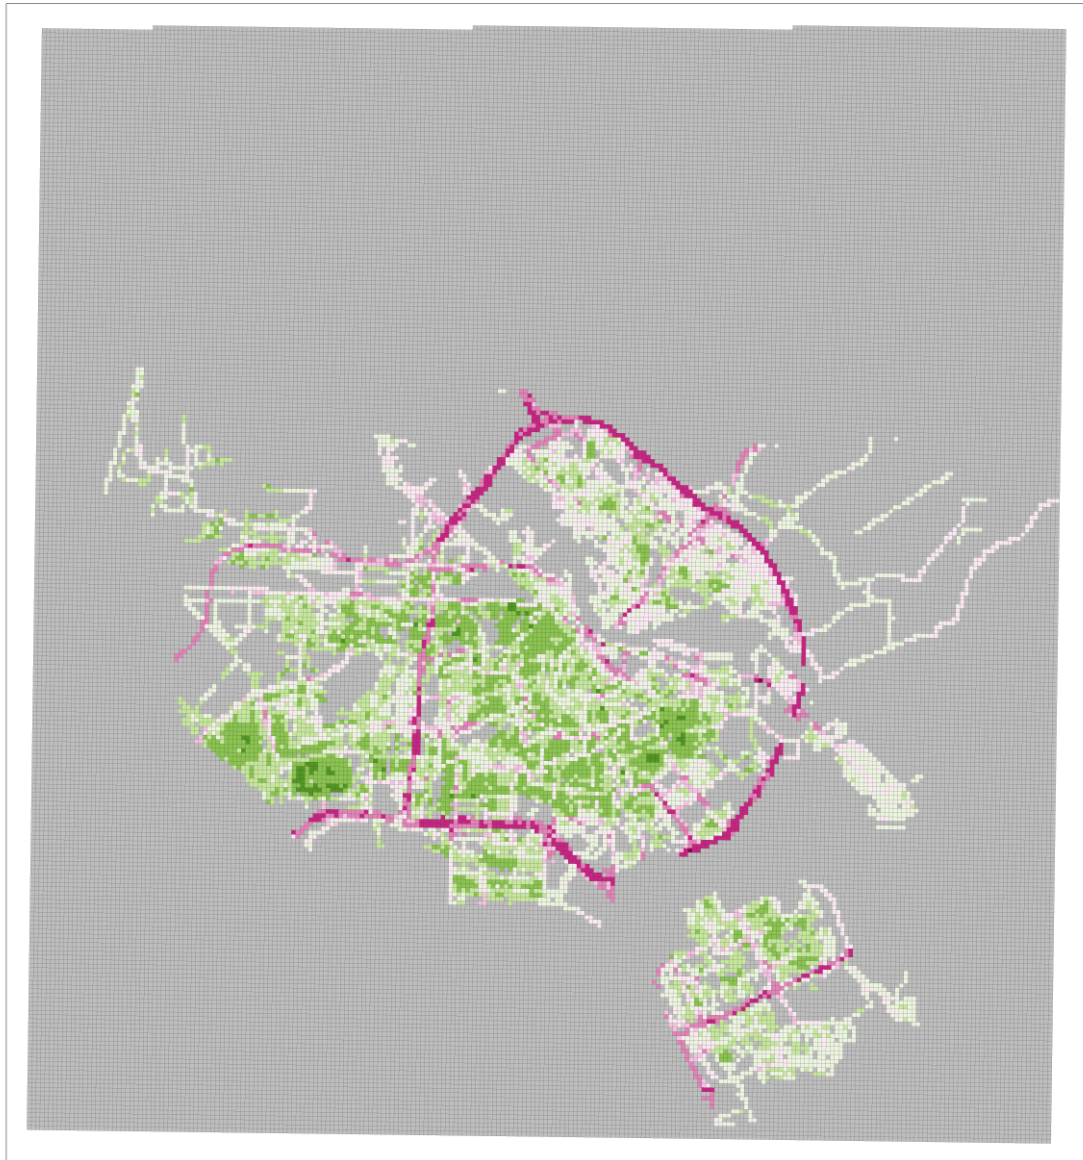

Figure S57 - Spatial residual Universal kriging – XGBoost kriging (Predicted NO2 values by XGBoost model - NO2 map Kerckhoffs)

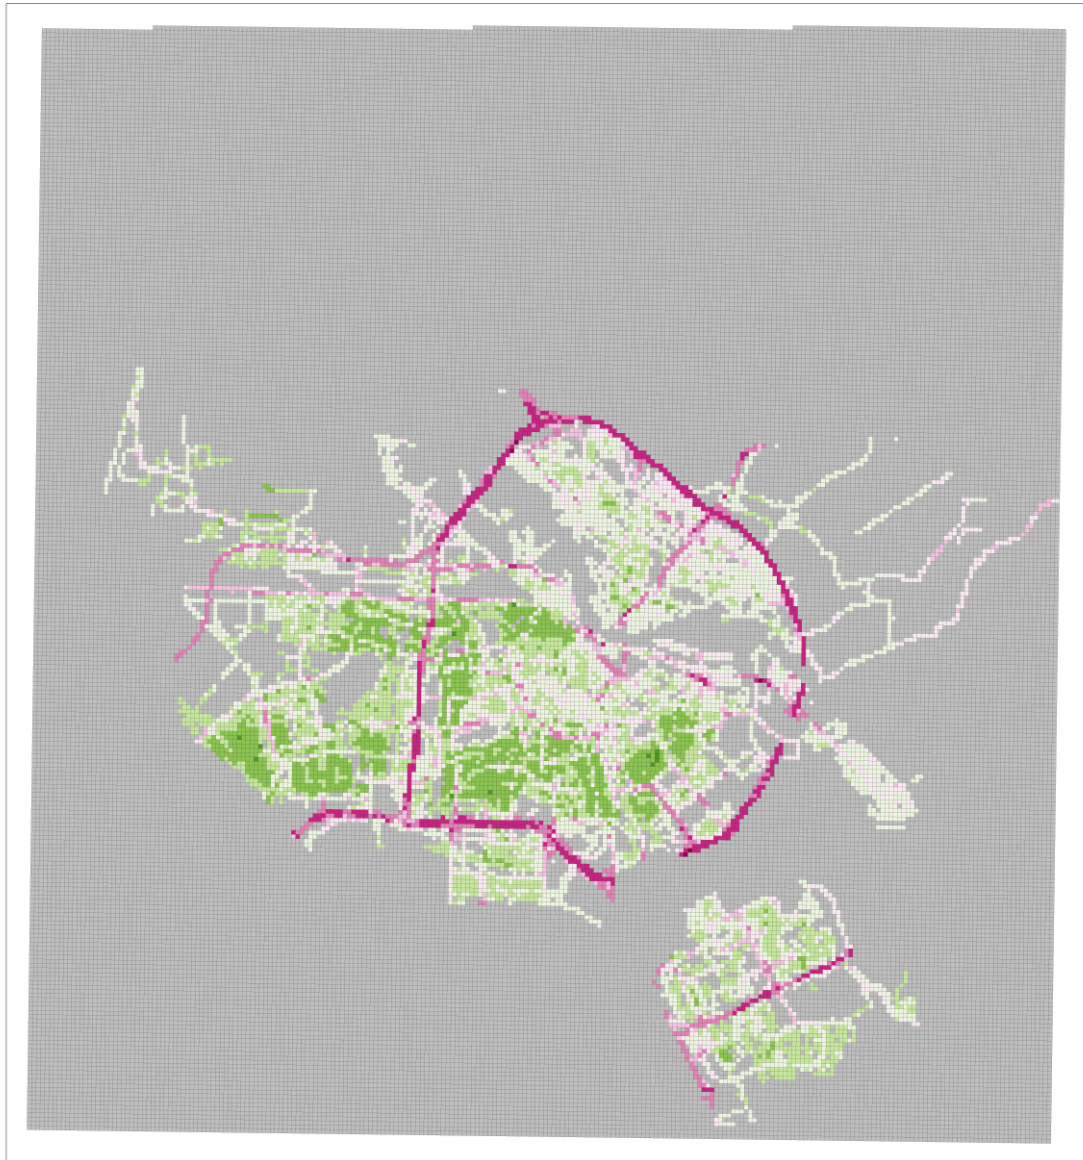

Figure S58 - Spatial residual LASSO (Predicted NO2 values by Lasso model - NO2 map Kerckhoffs)



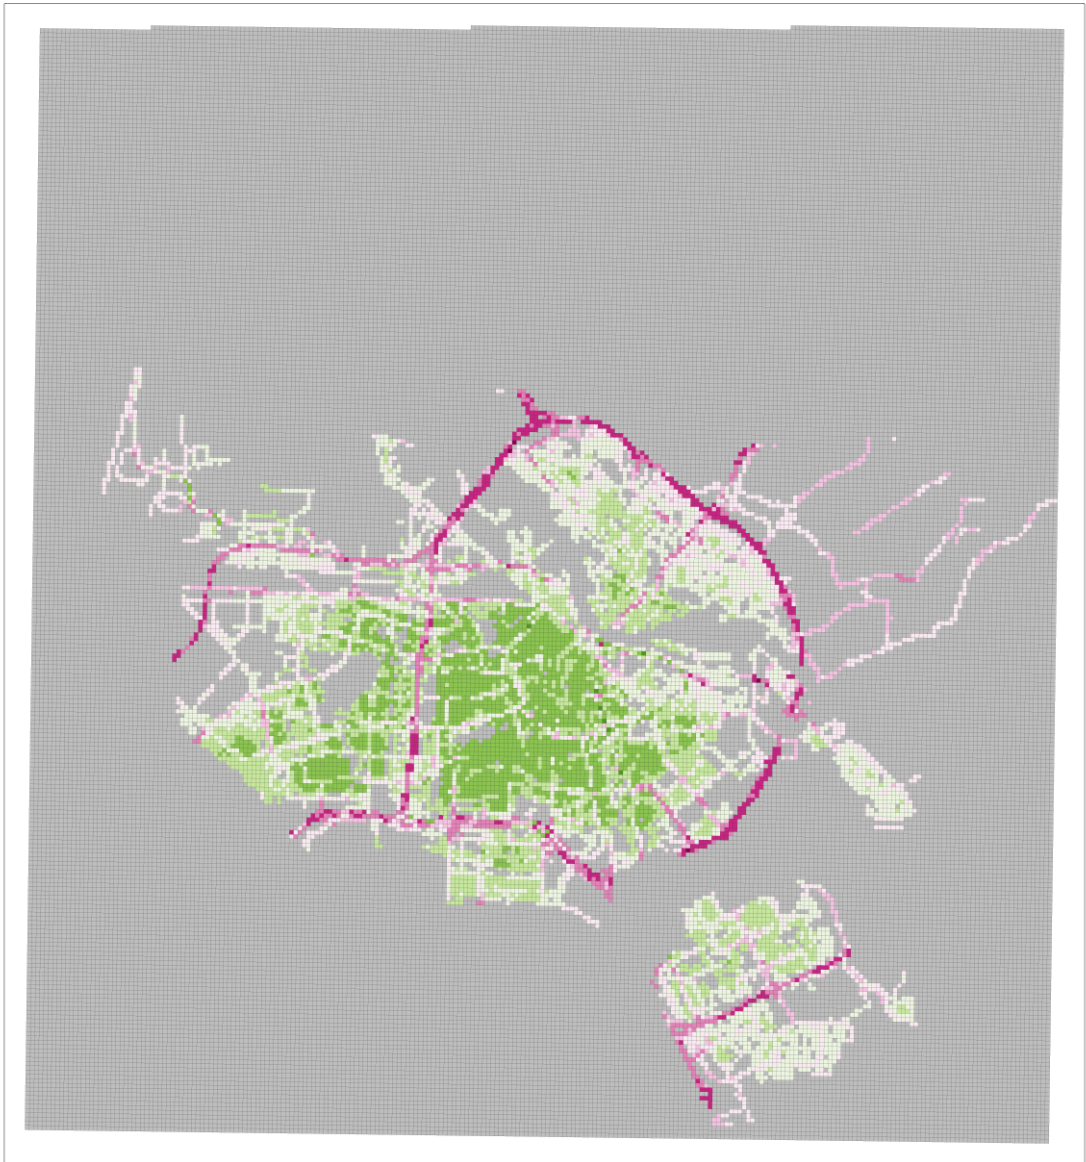

Figure S59 - Spatial residual Ridge (Predicted NO2 values by ridge model - NO2 map Kerckhoffs)

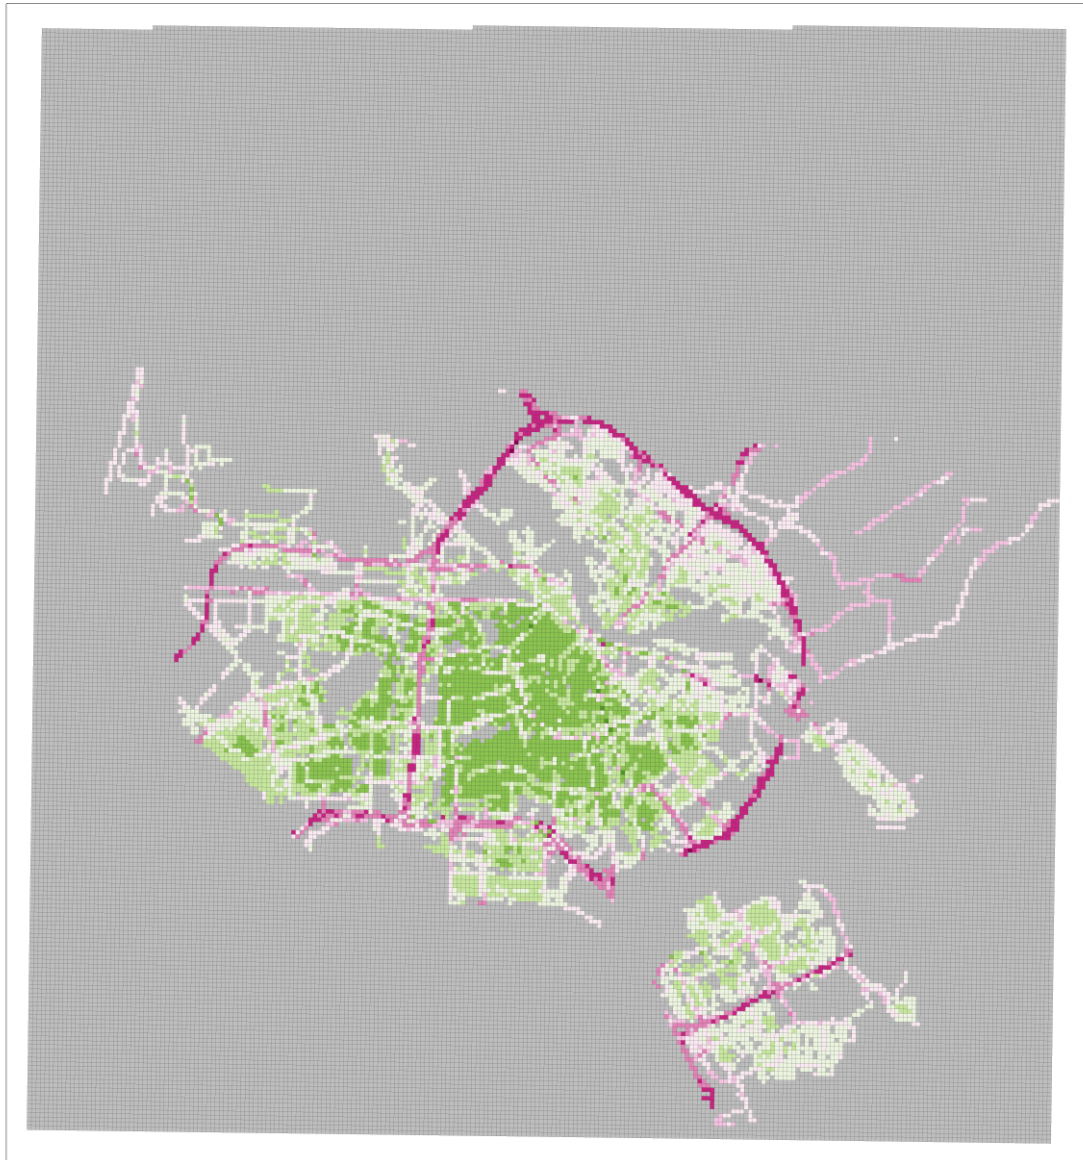

Figure S60 - Spatial residual Linear (Predicted NO2 values by Linear model - NO2 map Kerckhoffs)

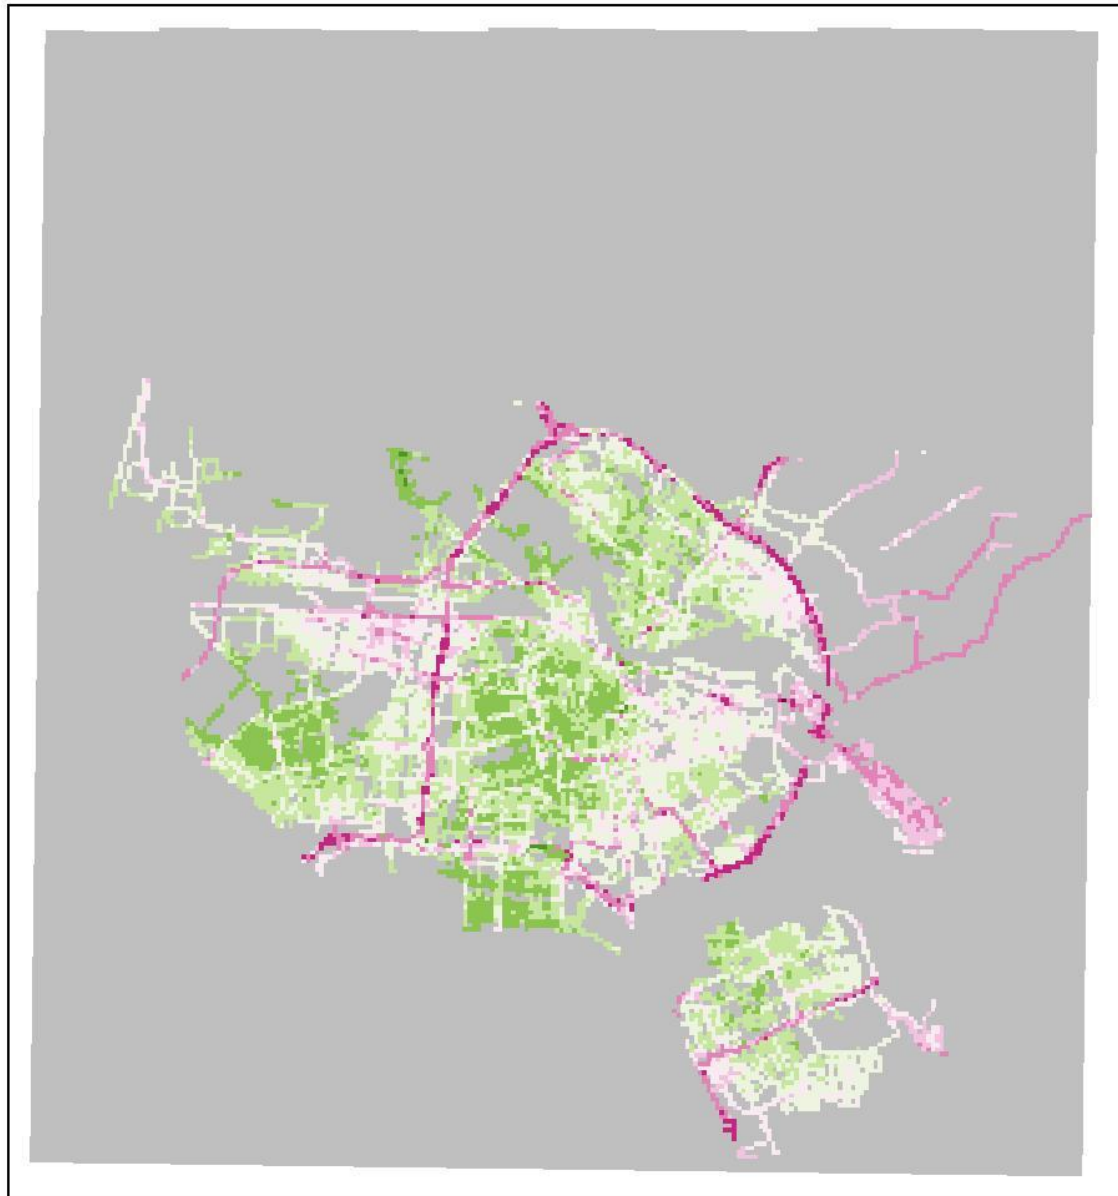

Figure S61 - Spatial residual Linear separated per spatial group (Predicted NO2 values by Linear model separated per spatial group - NO2 map Kerckhoffs)



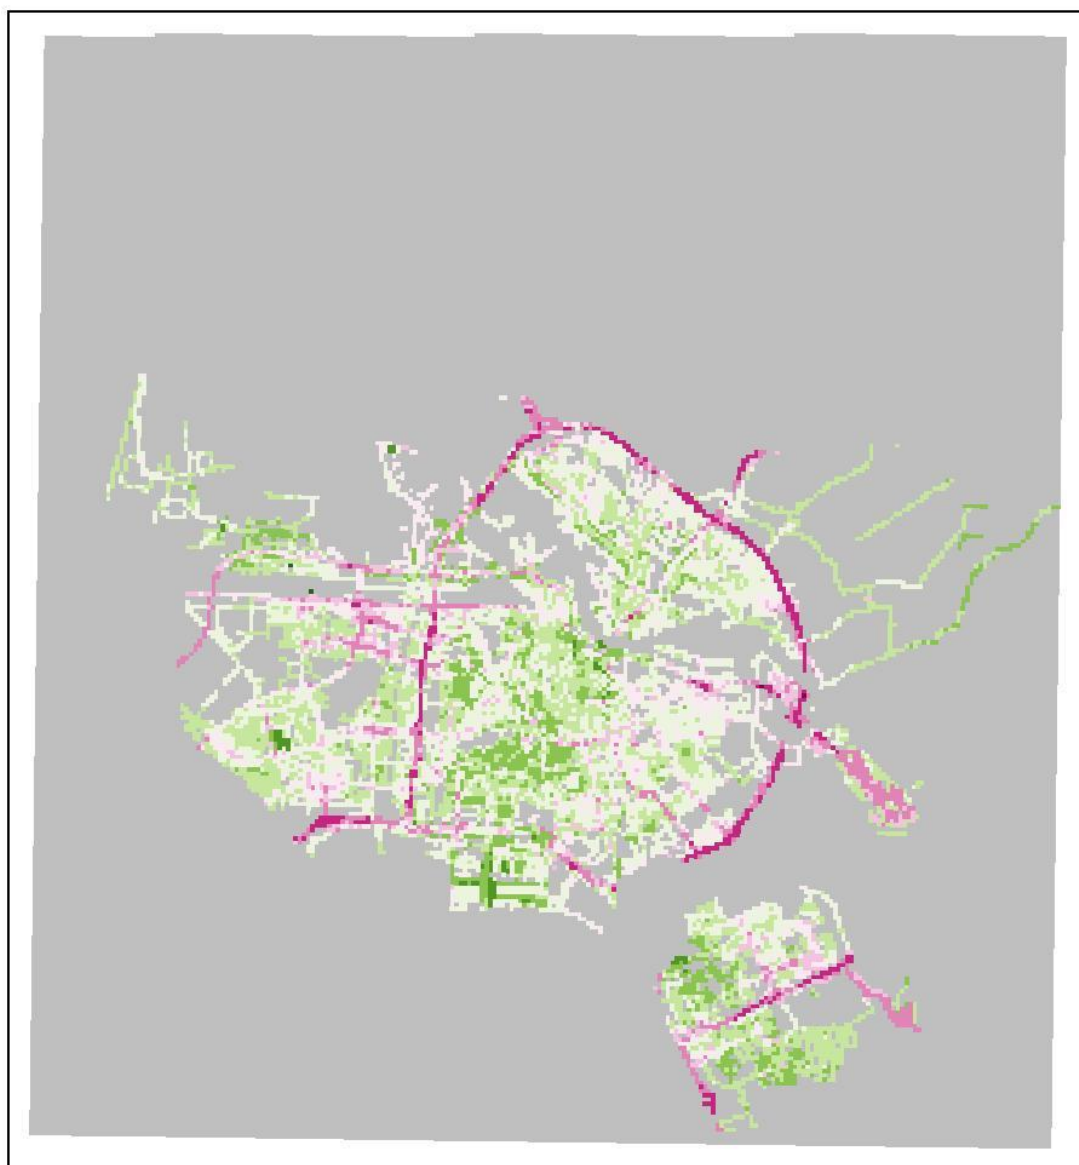

Figure S62 - Spatial residual Mixed effects model (Predicted NO2 values by mixed-effects model model - NO2 map Kerckhoffs)

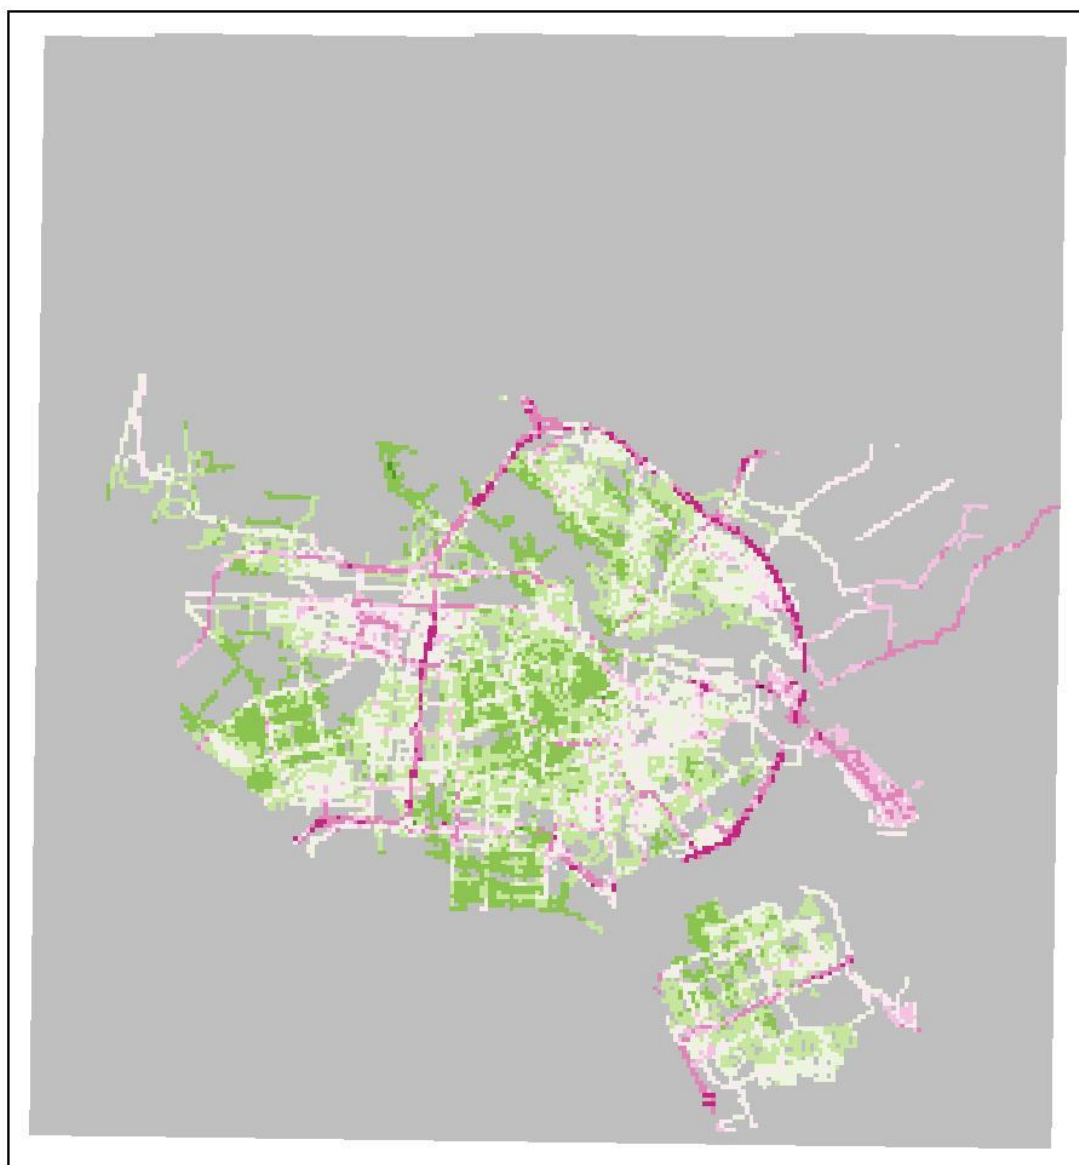

Figure S63 - Spatial residual ordinary kriging (Predicted NO2 values by ordinary kriging - NO2 map Kerckhoffs)

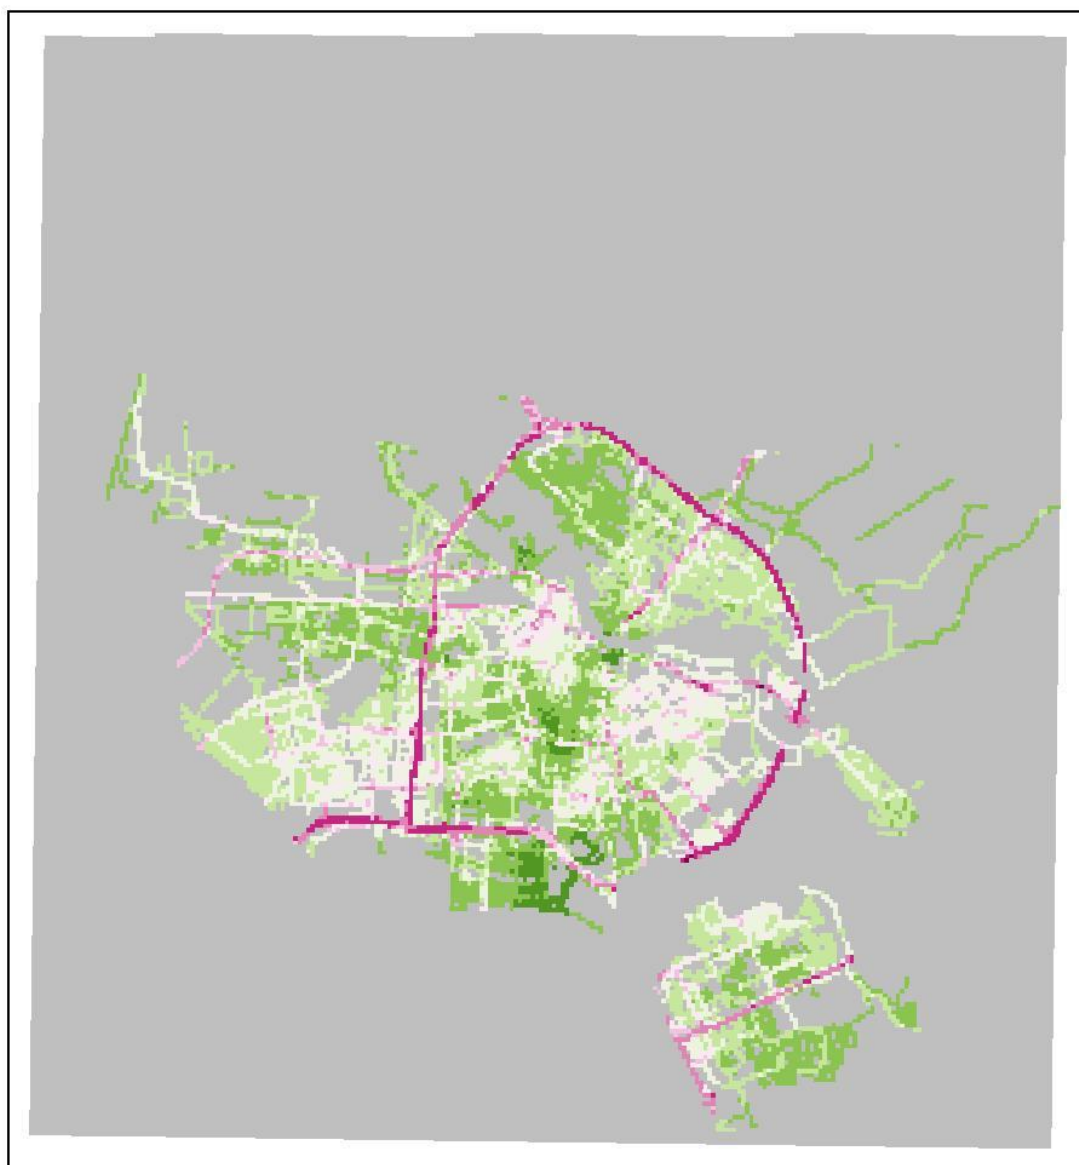

Figure S64 - Spatial residual universal kriging (Predicted NO2 values by universal kriging model - NO2 map Kerckhoffs)

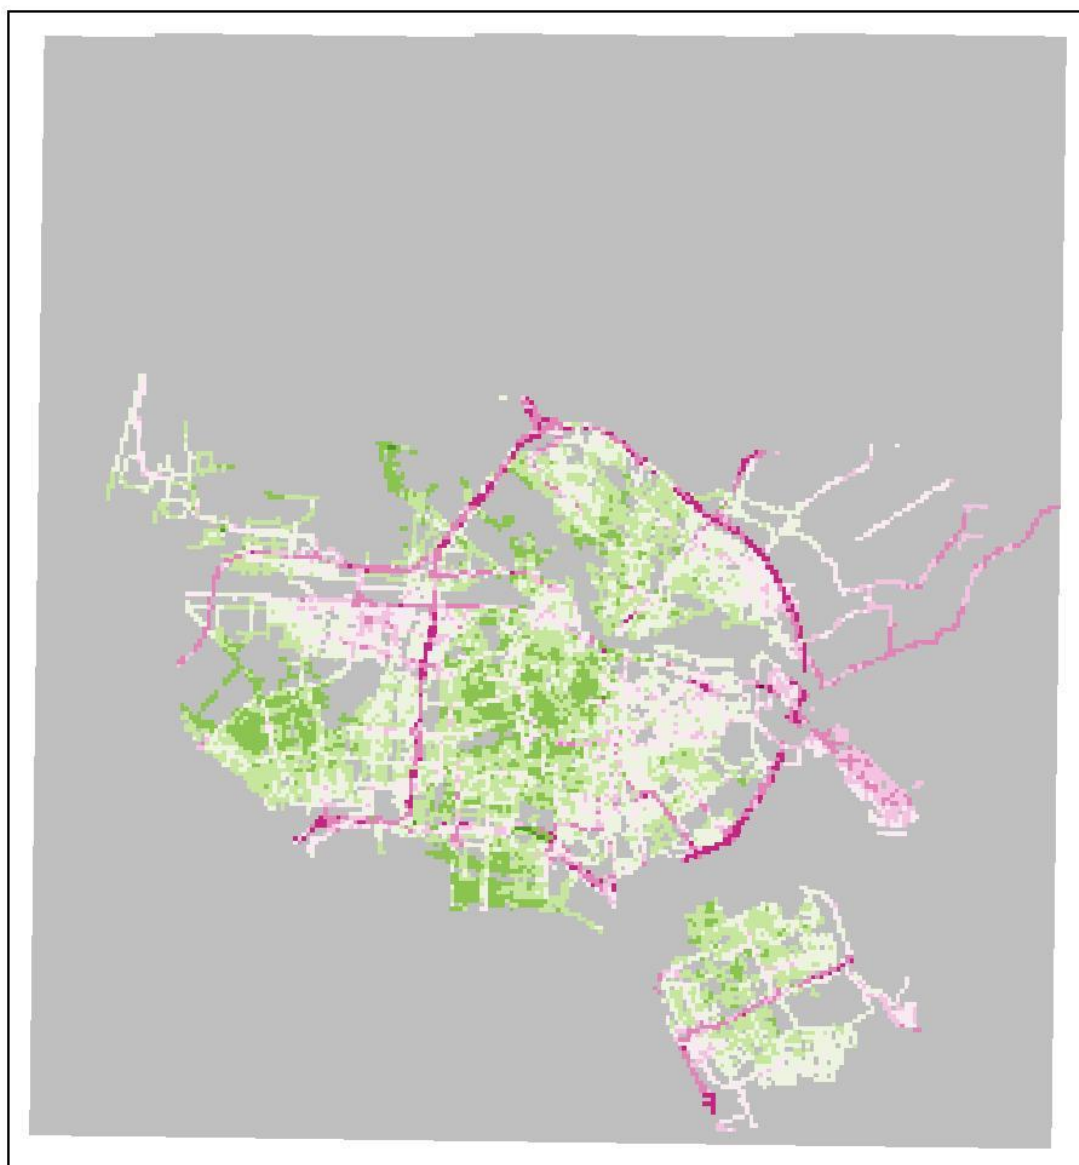

Figure S65 - Spatial residual Universal kriging – separated per spatial group (Predicted NO<sub>2</sub> values by universal kriging separated per spatial group model - NO<sub>2</sub> map Kerckhoffs)

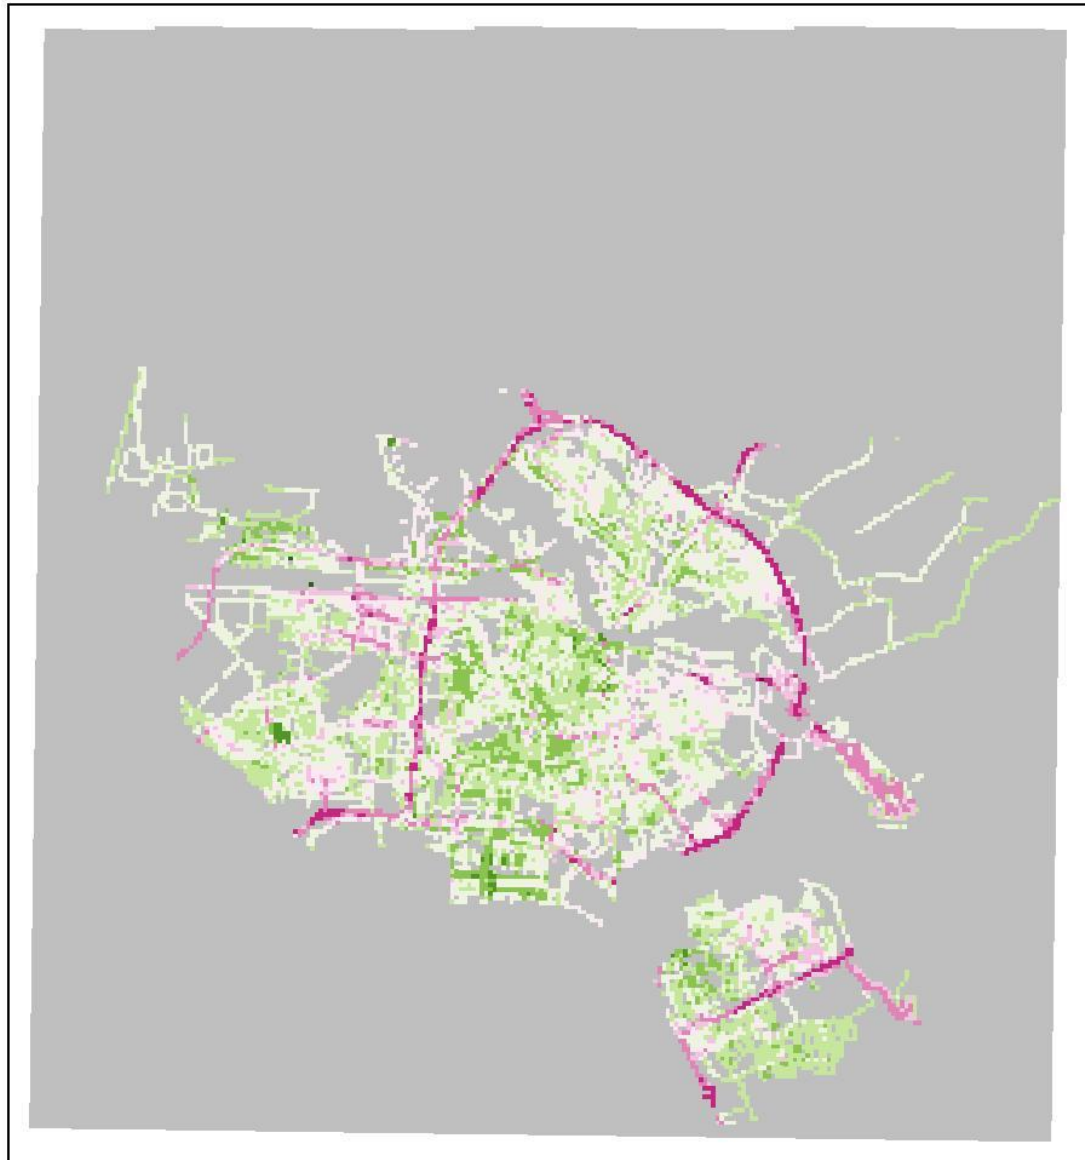

Figure S66 – Differences in model prediction vs ground measurement stations in Amsterdam random forest (global)

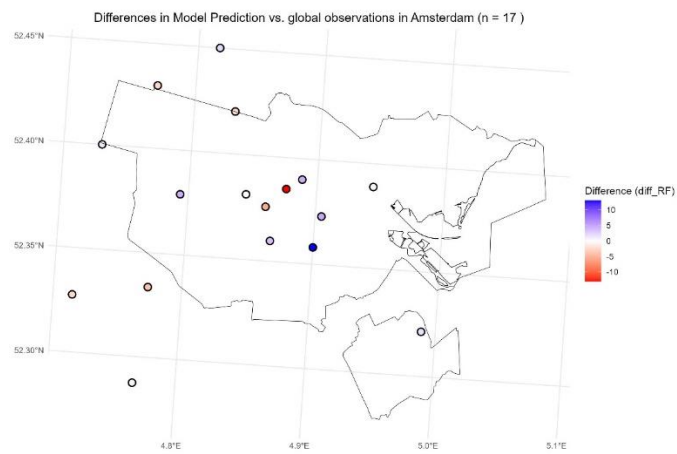

Figure S67 – Differences in model prediction vs ground measurement stations in Bayreuth random forest (global)

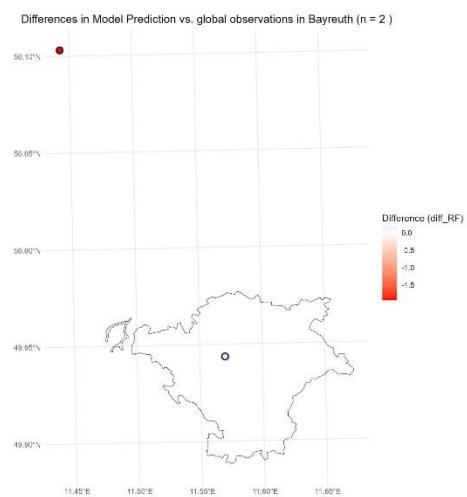

Figure S68 – Differences in model prediction vs ground measurement stations in Hamburg random forest (global)

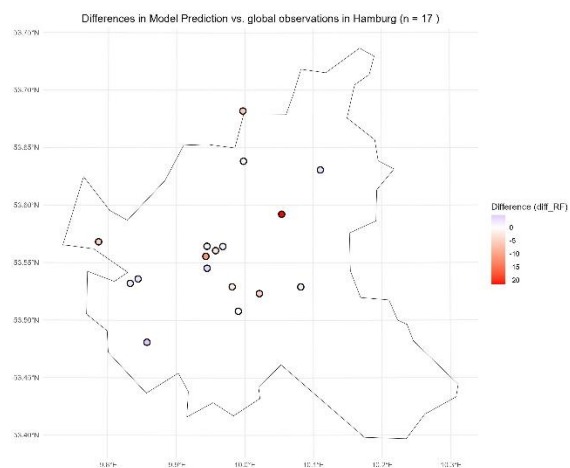

Figure S69 – Differences in model prediction vs ground measurement stations in Utrecht random forest (global)

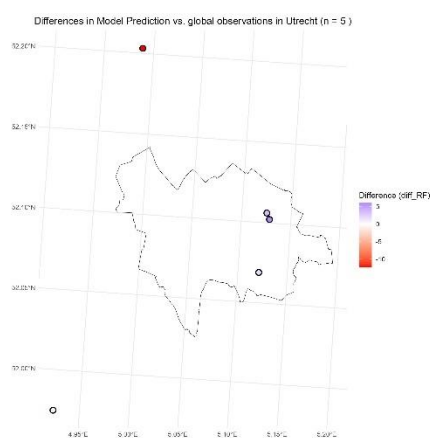

Figure S70 – Differences in model prediction vs ground measurement stations in Amsterdam XGBoost (global)

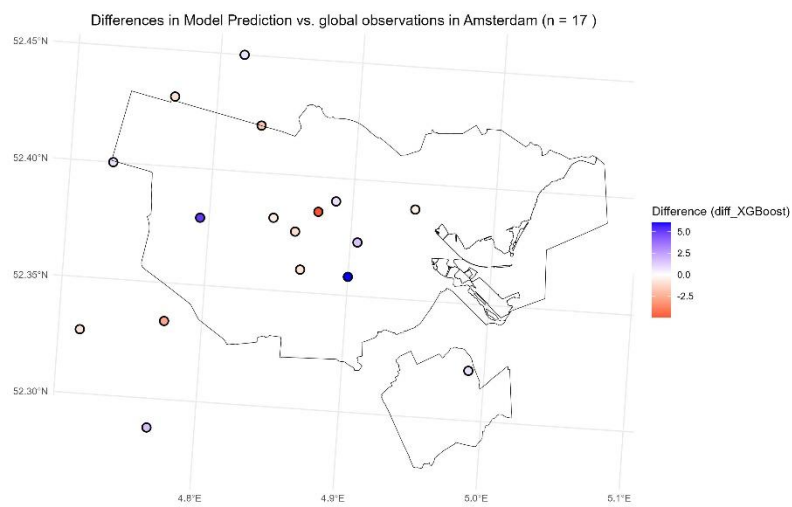

Figure S71 – Differences in model prediction vs ground measurement stations in Bayreuth XGBoost (global)

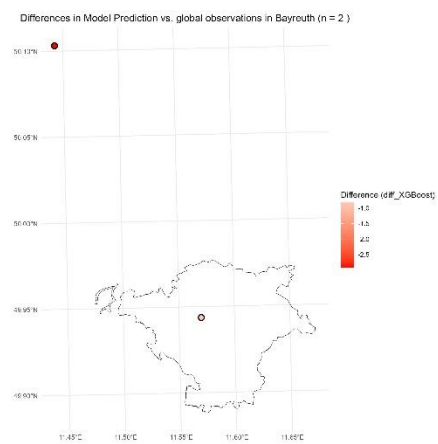

Figure S72 – Differences in model prediction vs ground measurement stations in Hamburg XGBoost (global)

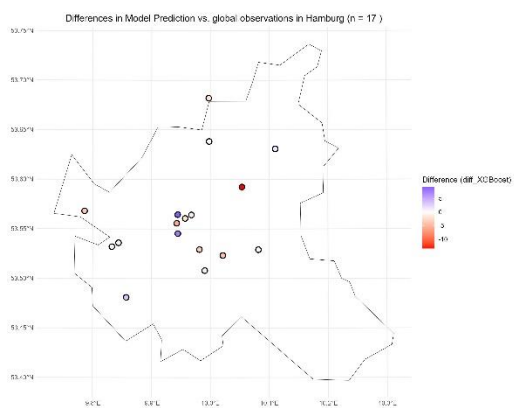



Figure S73 – Differences in model prediction vs ground measurement stations in Utrecht  
XGBoost (global)

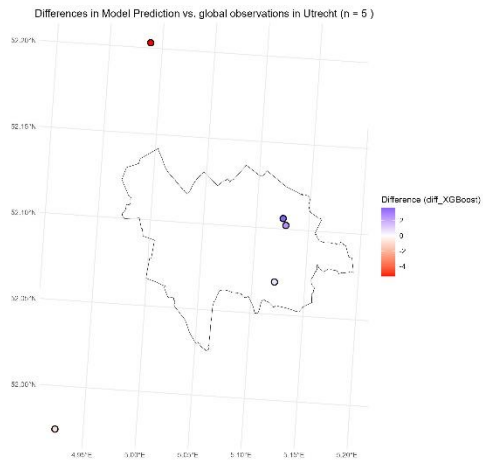

Figure S74 – Differences in model prediction vs ground measurement stations in Amsterdam  
LightGBM (global)

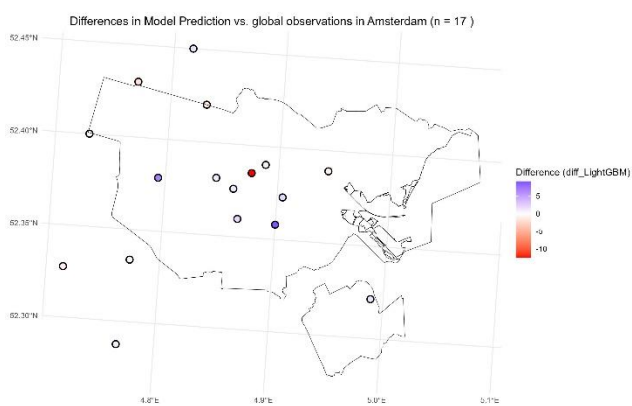

Figure S75 – Differences in model prediction vs ground measurement stations in Bayreuth  
LightGBM (global)

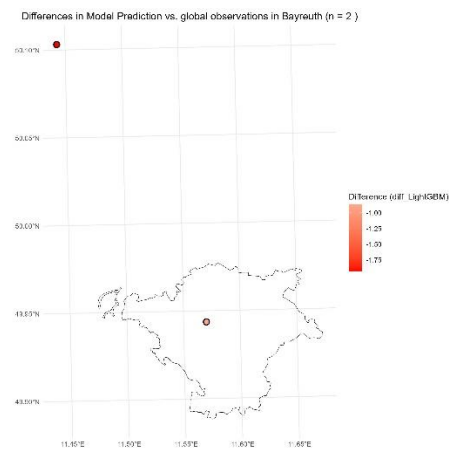

Figure S76 – Differences in model prediction vs ground measurement stations in Hamburg  
LightGBM (global)

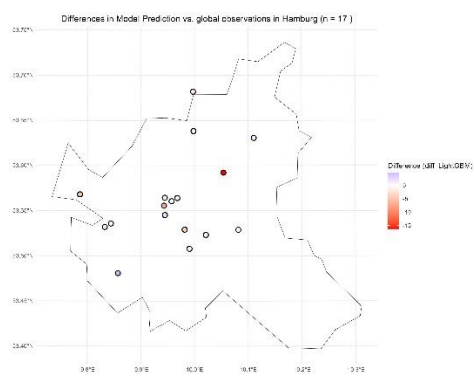

Figure S77 – Differences in model prediction vs ground measurement stations in Utrecht  
LightGBM (global)

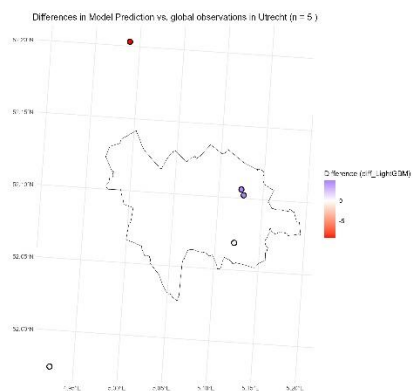

Figure S78 – Differences in model prediction vs ground measurement stations in Amsterdam LASSO (global)

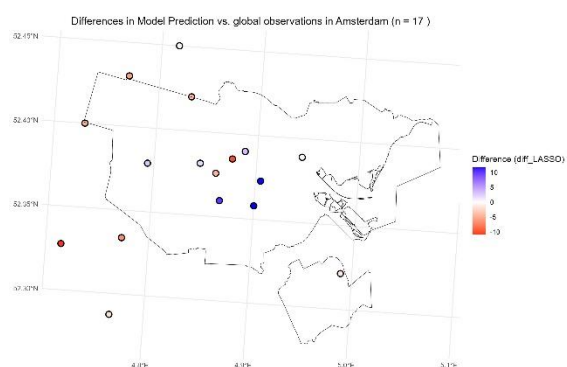

Figure S79 – Differences in model prediction vs ground measurement stations in Bayreuth LASSO (global)

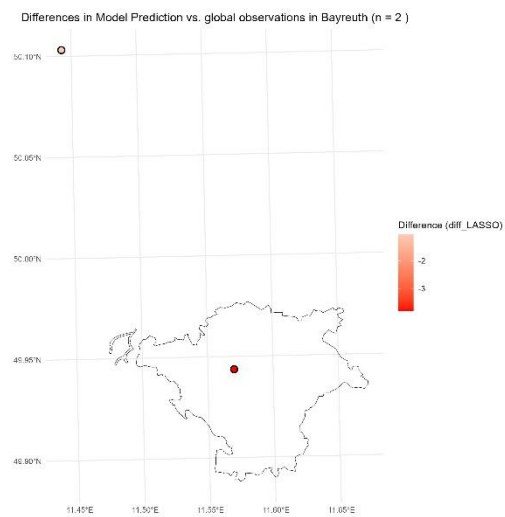

Figure S80 – Differences in model prediction vs ground measurement stations in Hamburg LASSO (global)

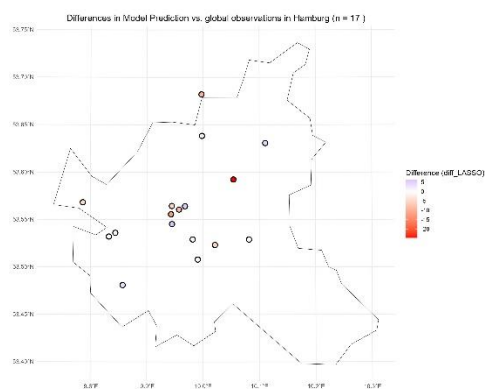

Figure S81 – Differences in model prediction vs ground measurement stations in Utrecht LASSO (global)

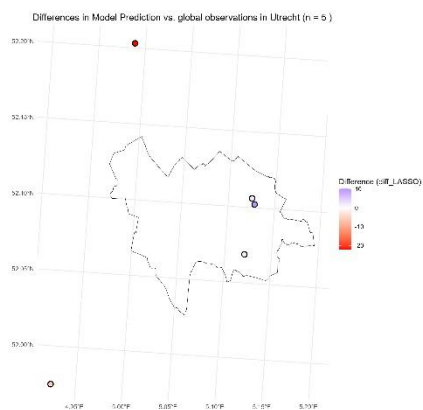

Figure S82 – Differences in model prediction vs ground measurement stations in Amsterdam Ridge (global)

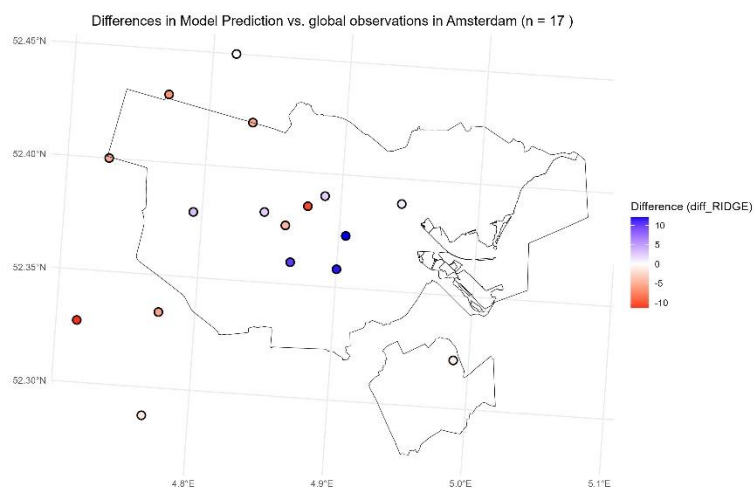

Figure S83 – Differences in model prediction vs ground measurement stations in Bayreuth Ridge (global)

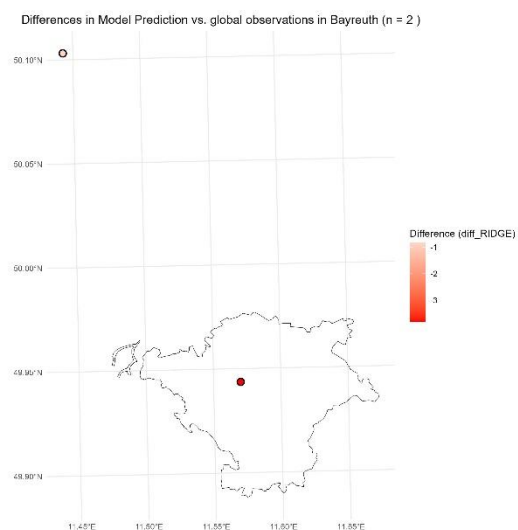

Figure S84 – Differences in model prediction vs ground measurement stations in Hamburg Ridge (global)

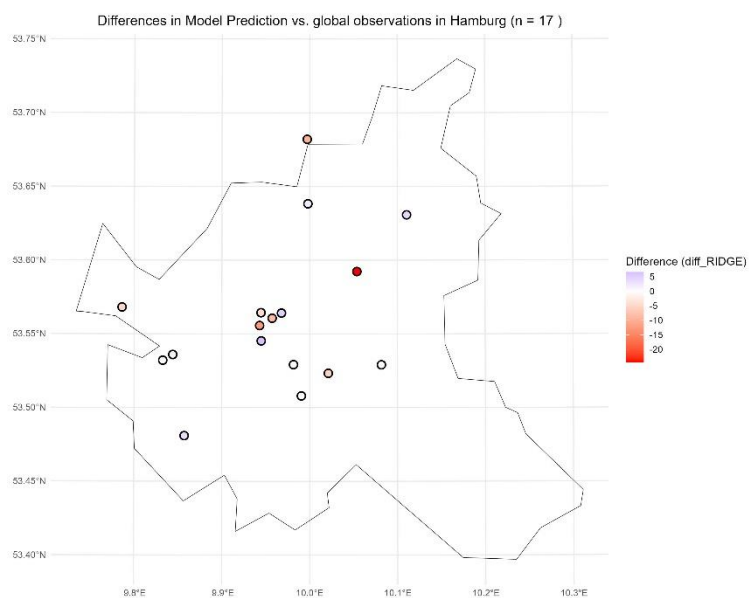

Figure S85 – Differences in model prediction vs ground measurement stations in Utrecht Ridge (global)

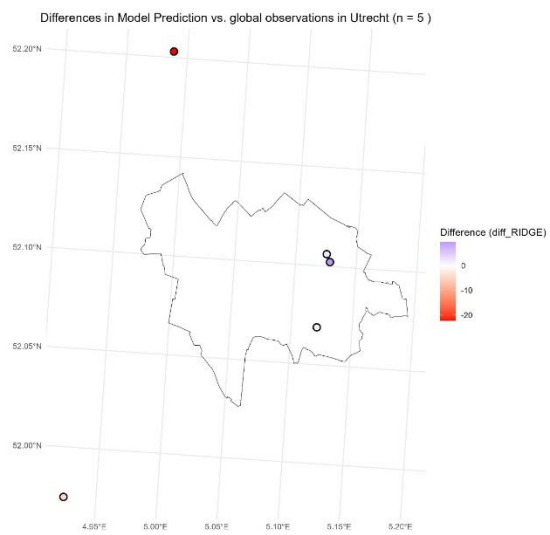

Figure S86 – Differences in model prediction vs ground measurement stations in Amsterdam linear (local)

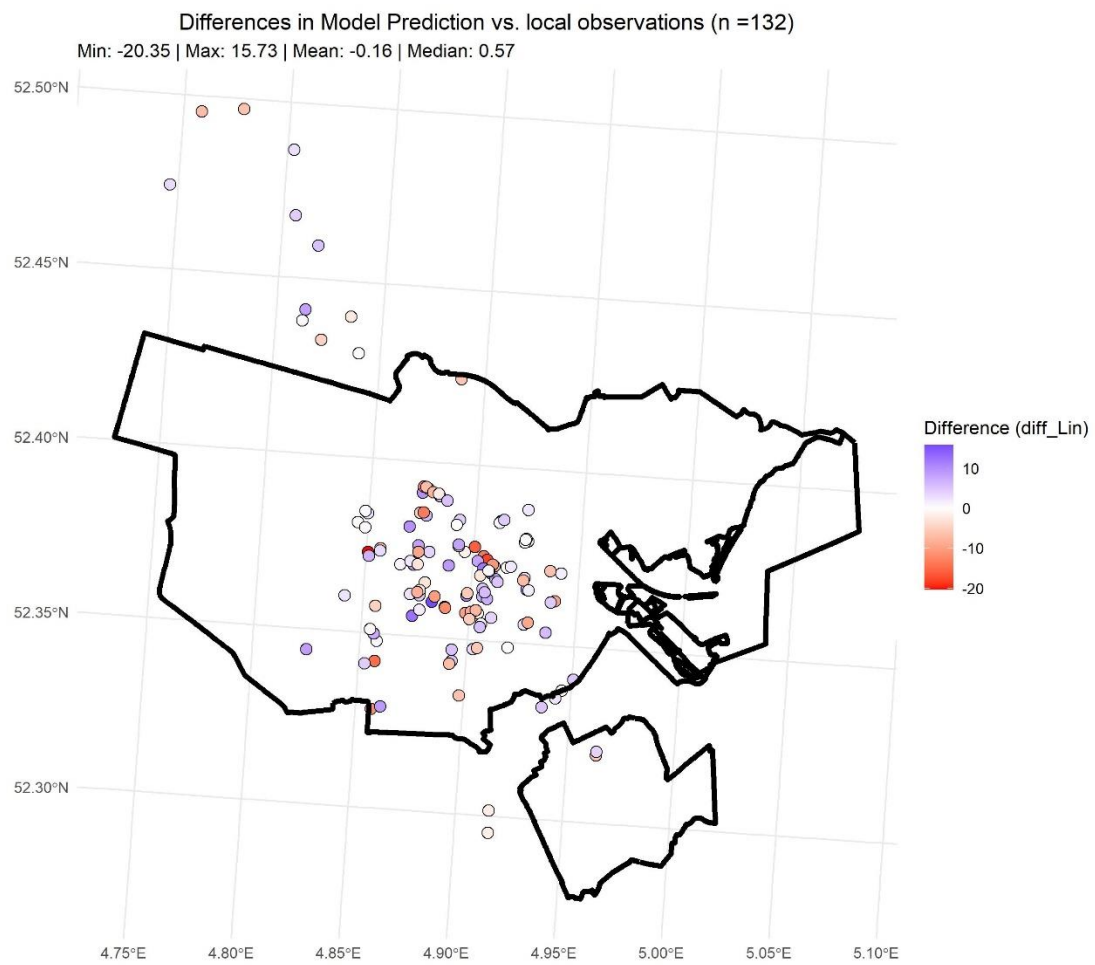

Figure S87 – Differences in model prediction vs ground measurement stations in Amsterdam linear separating for spatial groups (local)



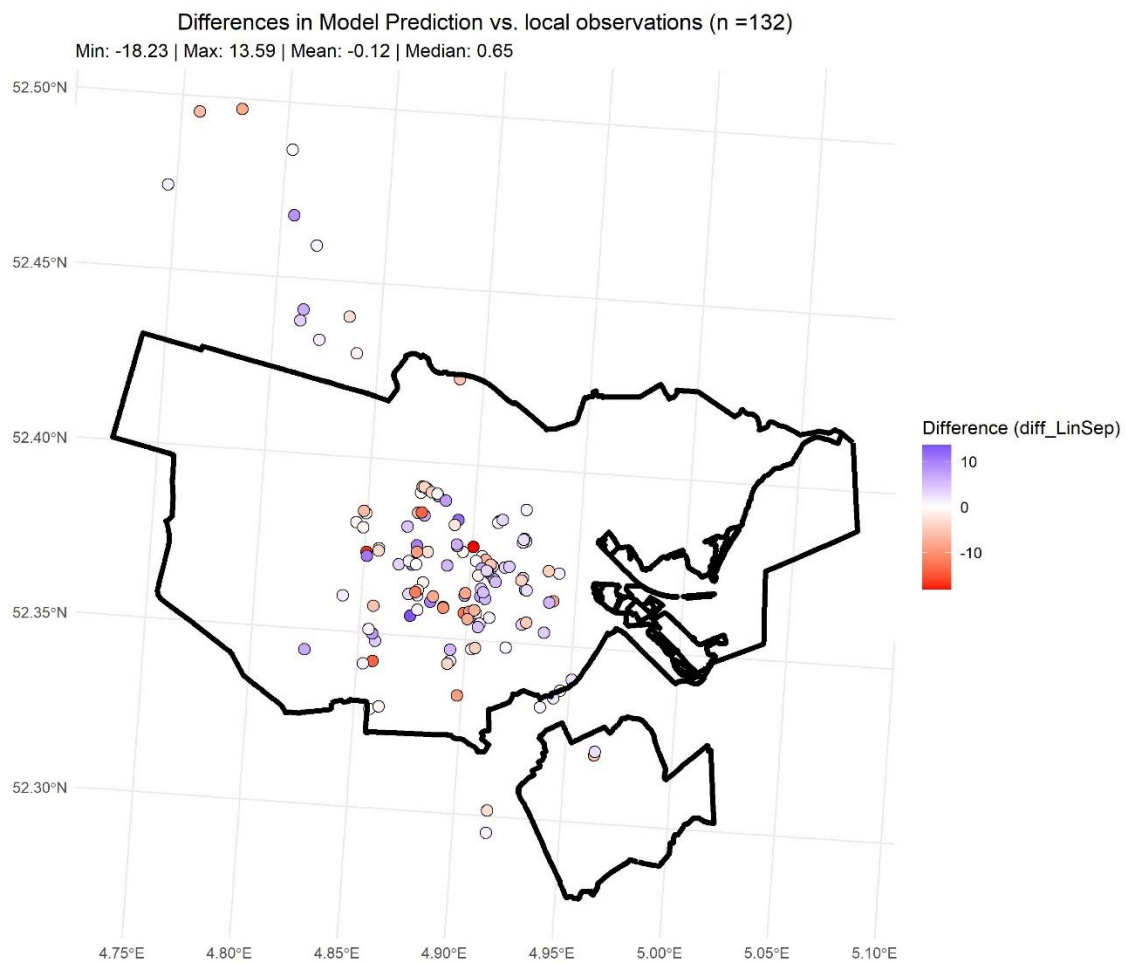

Figure S88 – Differences in model prediction vs ground measurement stations in Amsterdam mixed-effects model (local)

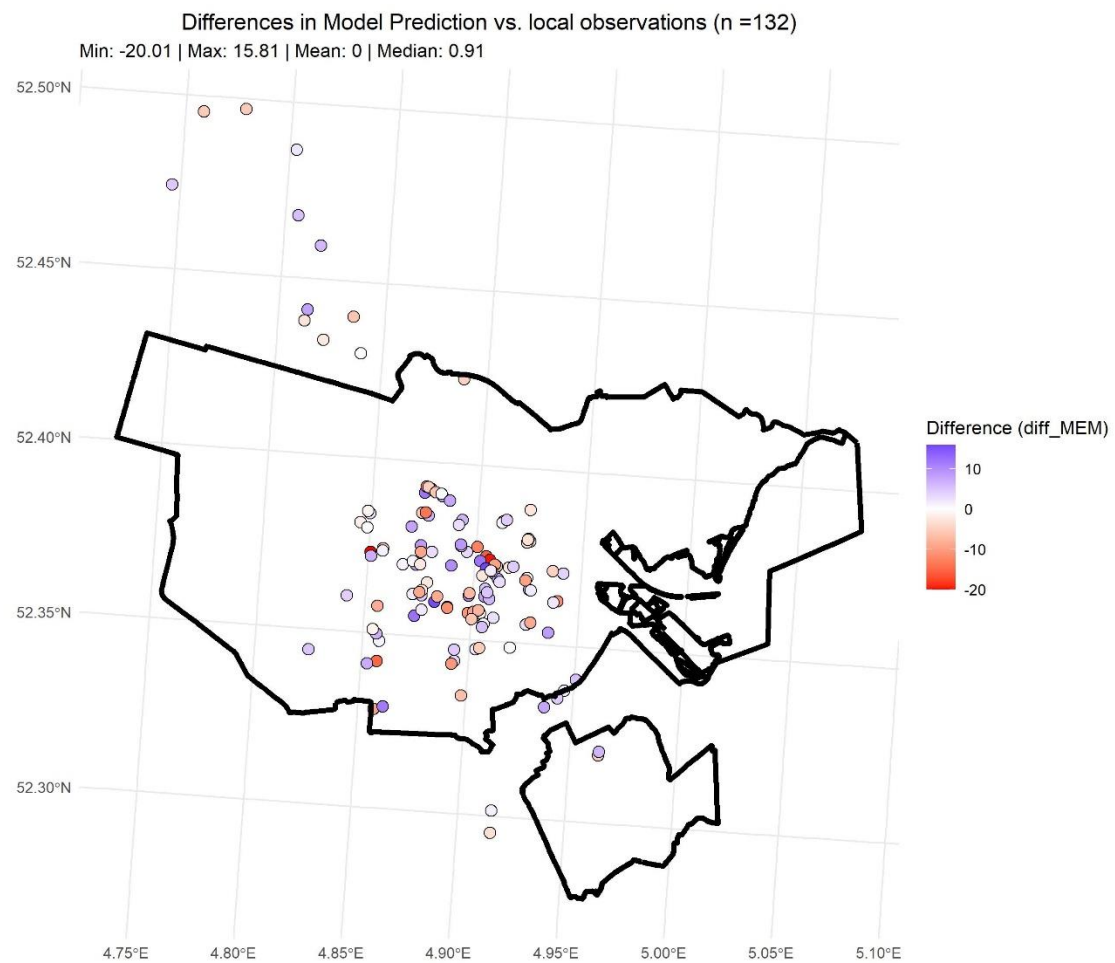

Figure S89 – Differences in model prediction vs ground measurement stations in Amsterdam universal kriging (local)

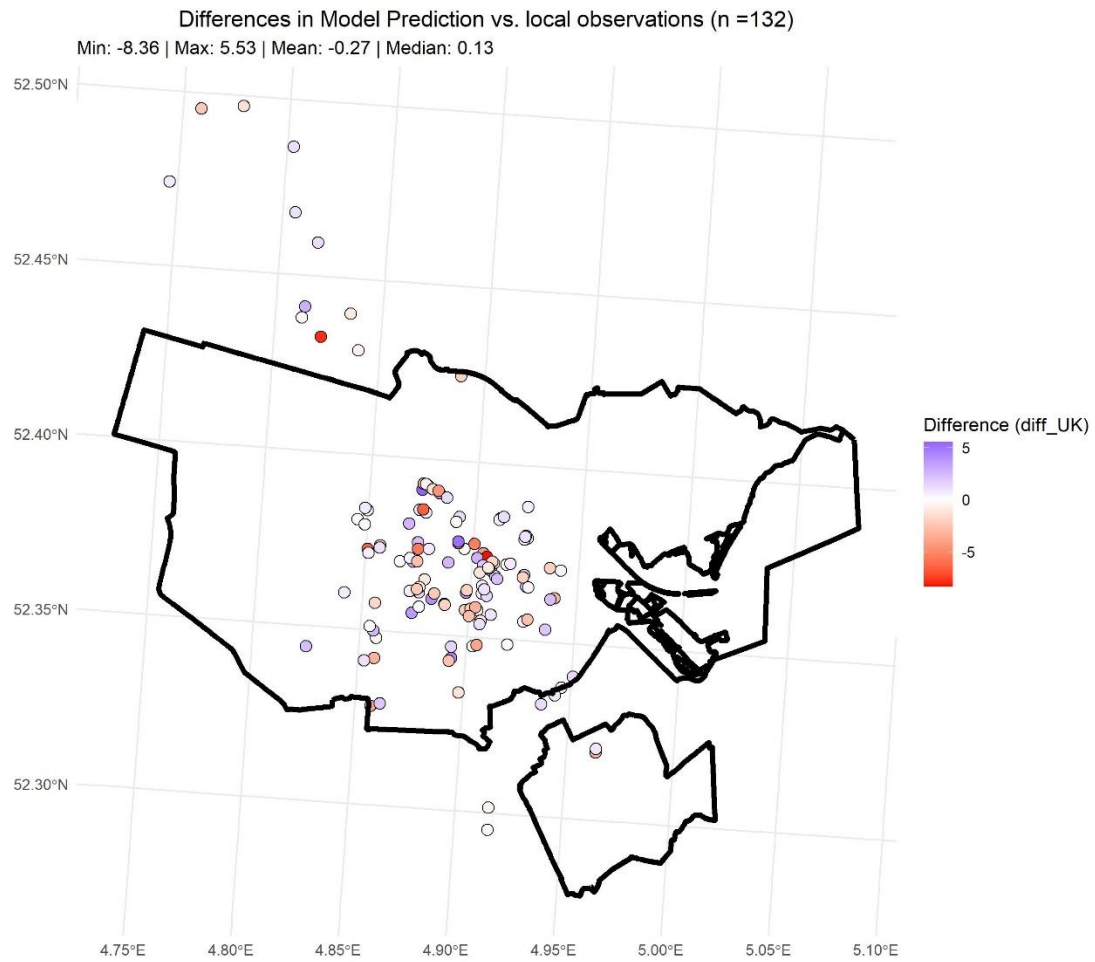

Figure S90 – Differences in model prediction vs ground measurement stations in Amsterdam universal kriging separating for spatial groups (local)

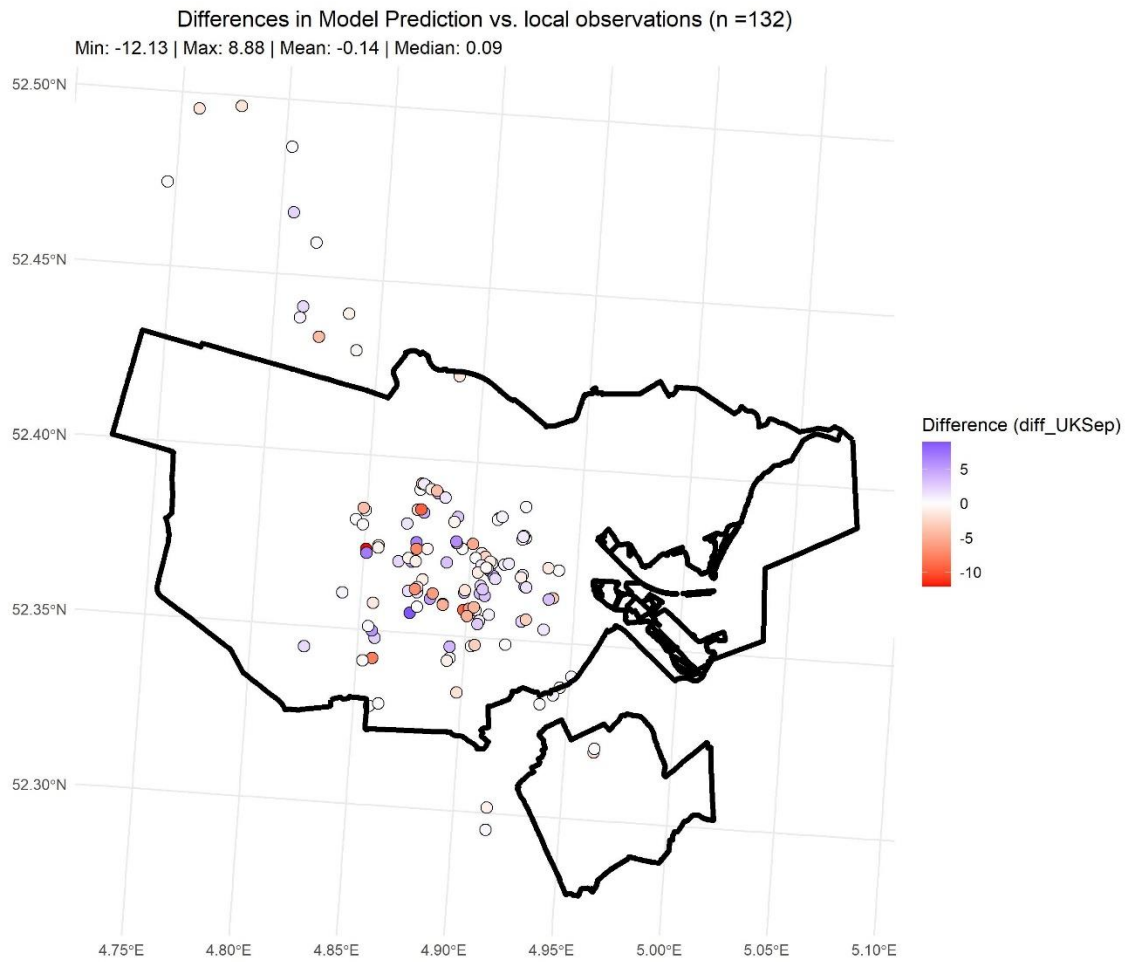

Figure S91 – Differences in model prediction vs ground measurement stations in Amsterdam ordinary kriging (local)

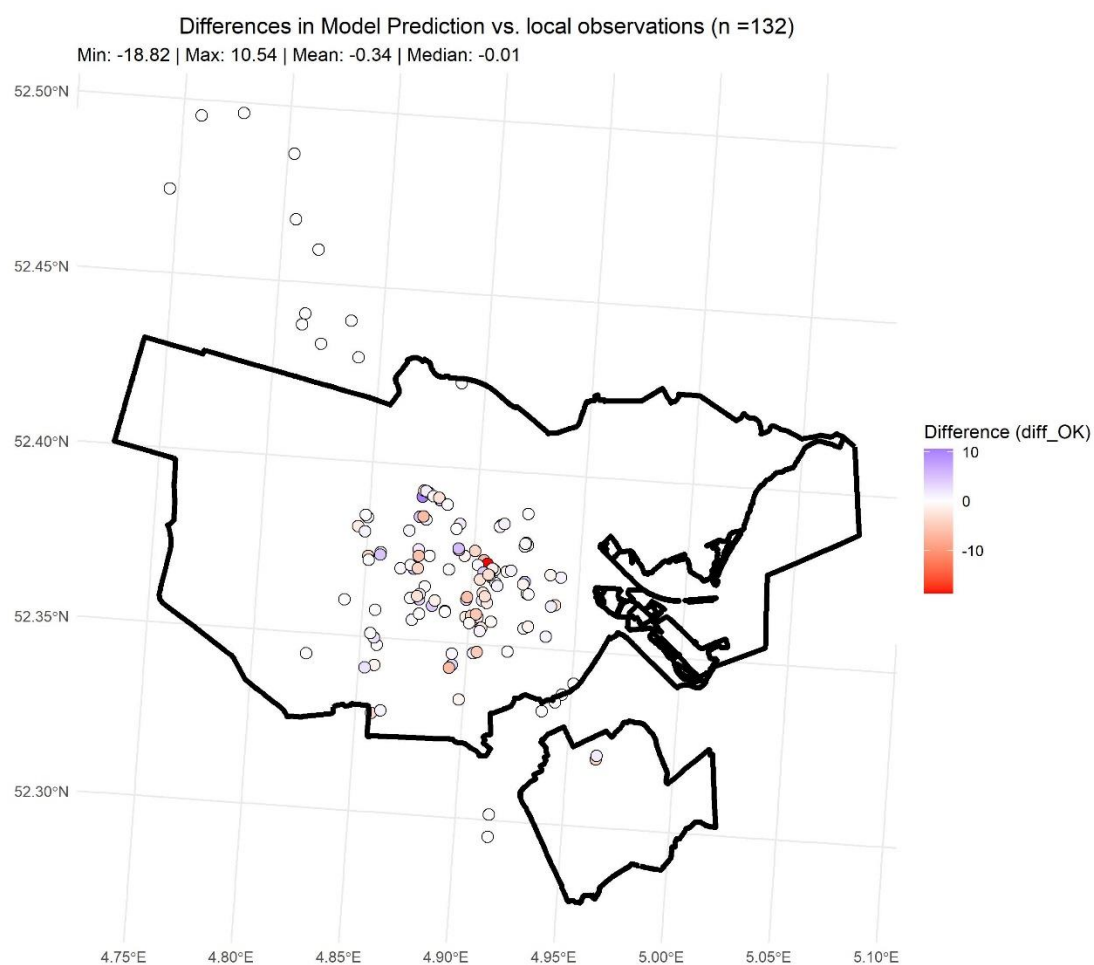

Table S1 initial dataset Lu et al. (2020)

Table 1: Description of variables used in the study.

| Variable      | Data                                                                                    | Unit                                                                     | Location                 | Time      | Source        |
|---------------|-----------------------------------------------------------------------------------------|--------------------------------------------------------------------------|--------------------------|-----------|---------------|
| road_class_1  | Total length of highway in various buffer sizes                                         | m (25m-, 50m-, 100m-, 300m-, 1000m-, 3000m-, 5000m-buffers)              | The Netherlands, Germany | 2017      | OpenStreetMap |
| road_class_2  | Total length of primary roads in various buffer sizes                                   | m (25m-, 50m-, 100m-, 300m-, 1000m-, 3000m-, 5000m-buffers)              | The Netherlands, Germany | 2017      | OpenStreetMap |
| road_class_3  | Total length of local roads in various buffer sizes                                     | m (25m-, 50m-, 100m-, 300m-, 1000m-, 3000m-, 5000m-buffers)              | The Netherlands, Germany | 2017      | OpenStreetMap |
| industry      | Area of industry in various buffer sizes                                                | m <sup>2</sup> (25m-, 50m-, 100m-, 300m-, 1000m-, 3000m-, 5000m-buffers) | The Netherlands, Germany | 2017      | OpenStreetMap |
| wind          | Monthly wind speed at 10 m altitude, for each month of the year                         | km/hr                                                                    | The Netherlands, Germany | 2017      | ERA-Interim   |
| temperature   | Monthly temperature at 2 m altitude, for each month of the year                         | Celsius                                                                  | The Netherlands, Germany | 2017      | ERA-Interim   |
| OMI_mean_filt | Annual mean vertical column density (level 3 product)                                   | mol/cm <sup>2</sup>                                                      | The Netherlands, Germany | 2017      | Earthdata     |
| TROPOMI       | Vertical column density (level 3 product), mean of monthly average from 2018/02-2019/01 | mol/cm <sup>2</sup>                                                      | The Netherlands, Germany | 2018-2019 | Tropomi       |
| RSP           | Remote sensing product from SCIAMACHY, GOME-2, global GEOS-Chem, 2011                   | g/m <sup>3</sup>                                                         | The Netherlands, Germany | 2011      | SCIAMACHY     |
| population    | Global Human Settlement Layer population grid                                           | count (absolute) (1000m-, 3000m-, 5000m-buffers)                         | The Netherlands, Germany | 2015      | -             |

Table S2: Model performance metrics for different spatial characteristics for local dataset. (nfold=20 repeated random sampling validation),

| Models        |      | Urban          |       |       | Suburban       |       |       | Rural          |       |       |
|---------------|------|----------------|-------|-------|----------------|-------|-------|----------------|-------|-------|
|               |      | R <sup>2</sup> | RMSE  | MAE   | R <sup>2</sup> | RMSE  | MAE   | R <sup>2</sup> | RMSE  | MAE   |
| Random Forest | Mean | -0.07          | 7.603 | 6.606 | 0.373          | 6.436 | 4.821 | -0.208         | 7.511 | 6.515 |
|               | SD   | 0.38           | 1.091 | 0.996 | 0.278          | 2.144 | 1.639 | 0.802          | 1.094 | 1.071 |
| LightGBM      | Mean | -0.134         | 7.802 | 6.627 | 0.337          | 6.448 | 5.25  | -0.251         | 7.743 | 6.518 |
|               | SD   | 0.425          | 1.043 | 0.941 | 0.336          | 1.788 | 1.38  | 0.726          | 1.462 | 1.279 |
| XGBoost       | Mean | -0.398         | 8.495 | 6.824 | 0.347          | 6.341 | 4.542 | -1.148         | 9.931 | 8.037 |
|               | SD   | 0.669          | 1.327 | 1.12  | 0.424          | 2.283 | 1.473 | 1.574          | 1.621 | 1.187 |
| Ridge         | Mean | -0.003         | 7.518 | 6.437 | 0.421          | 6.171 | 4.428 | -0.276         | 7.62  | 6.685 |
|               | SD   | 0.257          | 1.327 | 1.214 | 0.229          | 1.859 | 1.276 | 0.942          | 1.078 | 0.996 |
| Lasso         | Mean | -0.03          | 7.564 | 6.466 | 0.407          | 6.121 | 4.392 | -0.334         | 7.717 | 6.637 |
|               | SD   | 0.297          | 1.216 | 1.153 | 0.309          | 1.791 | 1.304 | 1.046          | 1.197 | 1.108 |

Table S3: Performance Metrics for Linear, LASSO and Ridge Regression Models (LOOCV)

| Local model | Metric | Total  | Urban  | Suburban | Rural  |
|-------------|--------|--------|--------|----------|--------|
| Linear      | RMSE   | 7.4121 | 7.8901 | 6.8003   | 7.3902 |
|             | R2     | 0.3073 | 0.1397 | 0.5087   | 0.1469 |
|             | MAE    | 5.9548 | 6.3598 | 5.3008   | 6.2019 |
| Lasso       | RMSE   | 7.4142 | 7.8774 | 6.8123   | 7.4080 |
|             | R2     | 0.3061 | 0.1400 | 0.5083   | 0.1460 |
|             | MAE    | 5.9603 | 6.3581 | 5.2977   | 6.2338 |
| Ridge       | RMSE   | 7.4420 | 7.8929 | 6.8174   | 7.4924 |
|             | R2     | 0.2968 | 0.1253 | 0.5197   | 0.1549 |
|             | MAE    | 6.0096 | 6.4493 | 5.2278   | 6.3877 |

Table S4 Variance Inflation Factor (VIF) for Features (global dataset)

| <b>Feature</b>      | <b>VIF</b> |
|---------------------|------------|
| nightlight_450      | 3.775581   |
| nightlight_3150     | 4.002998   |
| population_1000     | 15.366872  |
| population_3000     | 18.274317  |
| road_class_2_25     | 1.368278   |
| road_class_3_3000   | 6.047955   |
| road_class_3_300    | 3.052999   |
| trop_mean_filt_2019 | 1.552954   |
| BldDen100           | 2.993308   |
| NDVI                | 1.912893   |
| trafBuf25           | 10.976549  |
| trafBuf50           | 10.841305  |

Table S5: Variance Inflation Factor (VIF) for Features (local dataset)



| <b>Feature</b>    | <b>VIF</b> |
|-------------------|------------|
| nightlight_450    | 2.156364   |
| nightlight_4950   | 25.911217  |
| population_3000   | 20.571758  |
| road_class_1_5000 | 2.926517   |
| road_class_2_1000 | 1.538339   |
| road_class_2_5000 | 4.499247   |
| road_class_3_100  | 2.116426   |
| road_class_3_300  | 2.265685   |
| trafBuf50         | 1.168518   |

```
df['Urban']= np.where(df['population_1000'].gt(df['population_1000'].quantile(0.75)) &
(df['road_class_1_100'].gt(0) | df['road_class_2_100'].gt(0) |
df['road_class_3_100'].gt(df['road_class_3_100'].quantile(0.75))), 1, 0)

df['Suburban'] = np.where(df['population_1000'].lt(df['population_1000'].quantile(0.75)) &
(df['road_class_1_100'].gt(0) | df['road_class_2_100'].gt(0) |
df['road_class_3_100'].gt(df['road_class_3_100'].quantile(0.75))), 1, 0)

df['Rural'] = np.where(df['Urban'] | df['LowPop'] = 1, 0, 1)
```
