# Supplementary material for: A close look at using national ground stations for the statistical modeling of NO 2
Source: Copernicus journal article supplement (doi:10.5194/gmd-18-6717-2025), 2025-10-02
Supplement: Supplementary file 2 [file gmd-18-6717-2025-supplement.zip]

# Supplementary Equations

May 2025

## S1 Traffic Volume

The average hourly traffic  $T_x$  per buffer is calculated as:

$$T_x = \frac{\sum (l_{ix} \cdot T_{ix})}{\sum l_{ix}} \quad (\text{S1})$$

where  $l$  corresponds to the length of road segment  $i$  in buffer  $x$ .

## S2 Ensemble Trees

### S2.1 Random Forest

The model:

$$\hat{y} = \frac{1}{K} \sum_{k=1}^K T_k(x) \quad (\text{S2})$$

Node importance:

$$n_{ij} = w_j C_j - w_{\text{left}(j)} C_{\text{left}(j)} - w_{\text{right}(j)} C_{\text{right}(j)} \quad (\text{S3})$$

Feature importance:

$$fi_i = \frac{\sum_{j: \text{node } j \text{ splits on feature } i} n_{ij}}{\sum_{k \in \text{all nodes}} n_{ik}} \quad (\text{S4})$$

Normalized importance:

$$\text{norm } fi_i = \frac{fi_i}{\sum_{j \in \text{all features}} fi_j} \quad (\text{S5})$$

### S2.2 Gradient Boosting

#### S2.2.1 LightGBM

$$H_T(x) = \sum_{t=1}^T H_t(x), \quad H_t \in I \quad (\text{S6})$$

Learner optimization:

$$h_t(x) = \arg \min_{h \in H} L(y, H_{t-1}(x) + h(x)) \quad (\text{S7})$$

Negative gradient:

$$r_t = \frac{\partial L(y, H_{t-1}(x))}{\partial H_{t-1}(x)} \quad (\text{S8})$$

Fit approximation:

$$h_t(x) = \arg \min \sum (r_t - h_t(x))^2 \quad (\text{S9})$$

Strong learner:

$$H_t(x) = h_t(x) + H_{t-1}(x) \quad (\text{S10})$$

### S2.2.2 XGBoost

$$\hat{y}_i = \sum_{k=1}^K f_k(x_i), \quad f_k \in \mathcal{F} \quad (\text{S11})$$

$$\mathcal{F} = \{f(x) = w_{q(x)}\} \quad (\text{S12})$$

Objective function:

$$L(\phi) = \sum_i l(\hat{y}_i, y_i) + \sum_k \Omega(f_k) \quad (\text{S13})$$

$$\Omega(f) = \gamma T + \frac{1}{2} \lambda \|\omega\|^2 \quad (\text{S14})$$

After iteration:

$$L_t = \sum_i l(y, \hat{y}_{t-1}^i) + f_t(x_i) + \Omega(f_t) \quad (\text{S15})$$

Approximation:

$$L_t \approx \sum_{i=1}^n \left[ l(y, \hat{y}_{t-1}^i) + g_i f_t(x_i) + \frac{1}{2} h_i f_t^2(x_i) \right] + \Omega(f_t) \quad (\text{S16})$$

Optimal weight:

$$\omega_j^* = - \frac{\sum_{i \in I_j} g_i}{\sum_{i \in I_j} h_i + \lambda} \quad (\text{S17})$$

Minimum loss:

$$\tilde{L}_t = - \frac{1}{2} \sum_{j=1}^T \frac{(\sum_{i \in I_j} g_i)^2}{\sum_{i \in I_j} h_i + \lambda} \quad (\text{S18})$$

## S3 Multiple Linear Regression

$$y_i = \beta_0 + \beta_1 x_{i1} + \beta_2 x_{i2} + \cdots + \beta_j x_{ij} + \epsilon_i \quad (\text{S19})$$

$$\epsilon_i = y_i - \hat{y}_i \quad (\text{S20})$$

### S3.1 Ridge Regression

$$\min_{\beta} L_2 = (y - X\beta)^2 + \lambda \sum_{i=1}^p \beta_i^2 \quad (\text{S21})$$

### S3.2 LASSO Regression

$$\min_{\beta} L_1 = (y - X\beta)^2 + \lambda \sum_{i=1}^p |\beta_i| \quad (\text{S22})$$

### S4 Kriging

$$\gamma(h) = \frac{1}{2N(h)} \sum_{j=1}^{N(h)} [z(s_j + h) - z(s_j)]^2 \quad (\text{S23})$$

#### S4.1 Ordinary Kriging

$$Z \sim \mathcal{N}(\mu, \Sigma_Z) \quad (\text{S24})$$

$$\Sigma_Z = \delta^2 R(\alpha) + \tau^2 I \quad (\text{S25})$$

#### S4.2 Universal Kriging

$$\hat{z}(u) = \beta_0 + \beta_1 x_1(u) + \beta_2 x_2(u) + \cdots + \sum_{i=1}^n \lambda_i z(u_i) \quad (\text{S26})$$

### S5 Mixed Effects Model

$$y_{ij} = \beta_0 + \beta_1 x_{ij} + u_i + e_{ij} \quad (\text{S27})$$

### S6 Feature Selection with Shapley Values

$$\phi_j(val) = \sum_{S \subseteq N \setminus \{j\}} \frac{|S|!(|N| - |S| - 1)!}{|N|!} [val(S \cup \{j\}) - val(S)] \quad (\text{S28})$$

### References

- [1] Shapley, L. S. (1953). *Stochastic games*. Proceedings of the National Academy of Sciences, 39(10), 1095–1100.
- [2] Patelli, L., Cameletti, M., Golini, N., & Ignaccolo, R. (2023). A path in regression random forest looking for spatial dependence.
- [3] Yao, X., Fu, X., & Zong, C. (2022). Short-term load forecasting method based on feature preference strategy and LightGBM-XGBoost.
- [4] Khan, M. et al. (2023). Spatial interpolation of water quality index based on kriging.
- [5] Algaba, E., Fragnelli, V., & Sánchez-Soriano, J. (2019). *Handbook of the Shapley Value*. CRC Press.
