# Supplementary material for: A close look at using national ground stations for the statistical modeling of NO 2
Source: Copernicus journal article supplement (doi:10.5194/gmd-18-6717-2025), 2025-10-02
Supplement: Supplementary file 3 [file gmd-18-6717-2025-supplement.zip]

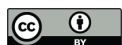

## *Supplement of*

# **A close look at using national ground stations for the statistical modeling of NO<sub>2</sub>**

**Foeke Boersma and Meng Lu**

*Correspondence to:* Foeke Boersma (foekeboersma@hotmail.com)

- [gmd-18-6717-2025-supplement-title-page.pdf](#)
- [supplementary - equations.pdf](#)
- [supplementary - figures.pdf](#)
- [supplementary - parameters.pdf](#)

The copyright of individual parts of the supplement might differ from the article licence.
